# Supplementary material for: Pd-Catalyzed cycloisomerization/nucleophilic addition/reduction: an efficient method for the synthesis of spiro-pseudoindoxyls containing N,N′-ketal
Source: Royal Society of Chemistry journal article supplement (doi:10.1039/c7qo00272f), 2017-01-01

**Pd-Catalyzed Cycloisomerization/Nucleophilic Addition/Reduction: An Efficient  
Method for the Synthesis of Spiro-pseudoindoxyls Containing *N, N'*-Ketal**

Lin-Wei Chen,<sup>1</sup> Jia-Lin Xie,<sup>1</sup> Hong-Jian Song,<sup>1\*</sup> Yu-Xiu Liu,<sup>1</sup> Yu-Cheng Gu,<sup>3</sup> and Qing-Min  
Wang<sup>1,2\*</sup>

<sup>1</sup>State Key Laboratory of Elemento-Organic Chemistry, Research Institute of Elemento-Organic  
Chemistry, Nankai University, Tianjin 300071, People's Republic of China

<sup>2</sup>Collaborative Innovation Center of Chemical Science and Engineering (Tianjin), Tianjin 300071,  
People's Republic of China

<sup>3</sup> Syngenta, Jealott's Hill International Research Centre, Bracknell, Berks, RG42 6EY, UK

\*To whom correspondence should be addressed. Tel: +86-(0)22-23503952; Fax: +86-(0)22-  
23503952; E-mail: songhongjian@nankai.edu.cn, wangqm@nankai.edu.cn.

## Table of content

|                                                 |         |
|-------------------------------------------------|---------|
| Detailed synthetic procedure.....               | S3-S30  |
| References.....                                 | S31     |
| The NMR spectra of substrates and products..... | S32-S93 |

## Detailed Synthetic Procedure

**General Information:** All reagents were used as received. 1,2-Dichloroethane (DCE) was distilled on phosphorus pentoxide; toluene and dioxane were dried by metallic sodium. N,N-dimethylformamide (DMF) was distilled from calcium hydride; CF<sub>3</sub>CH<sub>2</sub>OH and HFIP were purchased from purchased from duodian-chem Co. Ltd. Pd(OAc)<sub>2</sub> and tmphen were purchased from Boka Chem. Co. Ltd; PPh<sub>3</sub> was purchased from Sigma-Aldrich Co. LLC.; <sup>1</sup>H and <sup>13</sup>C Nuclear Magnetic Resonance (NMR) spectra were recorded on a Bruker Avance 400 Ultrashield NMR spectrometers. High-resolution mass spectrometry (HRMS) data were obtained on an FTICR-MS instrument (Ionspec 7.0 T). The melting points were determined on an X-4 binocular microscope melting point apparatus (Beijing Tech Instruments Co.) and are uncorrected.

**General procedure for the synthesis of the starting material E (4-methyl-N-(5-(2-nitrophenyl)pent-4-yn-1-yl)benzenesulfonamide)**

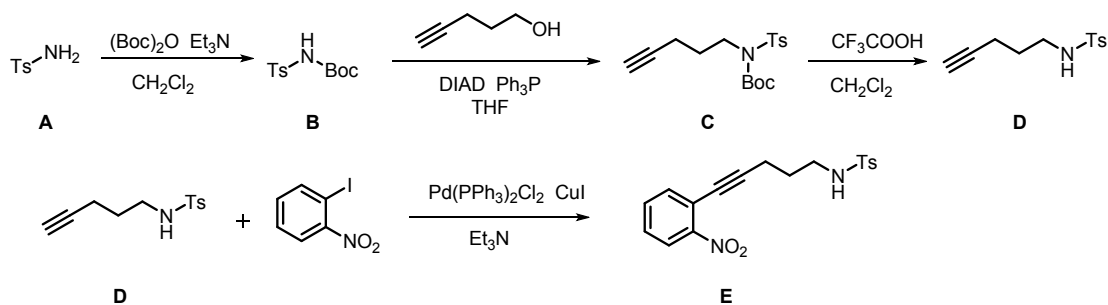

**The synthetic route of substrates B (*tert*-butyl tosylcarbamate)<sup>1</sup>**

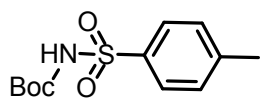

A solution of Boc<sub>2</sub>O (7.0 g, 32.1 mmol) in dichloromethane (10 mL) was added dropwise at room temperature to a solution of triethylamine (3.3 g, 32.1 mmol), DMAP (0.39 g, 3.21

mmol) and p-toluenesulfonamide (5.0 g, 29.2 mmol) in dichloromethane (100 mL). The colorless reaction mixture was stirred at room temperature for 5 h. After completion the solvent was removed under vacuum, the residue was diluted with ethyl acetate (100 mL) and 1N HCl (80 mL). An organic layer was washed with water, brine and then dried over MgSO<sub>4</sub> and concentrated on a rotary evaporator to give a white solid. Crystallization from hot hexane (50 mL) gave **B**. White solid, yield 7.32 g, 93%. Mp 121–122 °C. <sup>1</sup>H NMR (400 MHz, CDCl<sub>3</sub>) δ 7.92 (d, *J* = 8.3 Hz, 2H), 7.57 (br, 1H), 7.35 (d, *J* = 8.3 Hz, 2H), 2.47 (s, 3H), 1.40 (s, 9H). <sup>13</sup>C NMR (100 MHz, CDCl<sub>3</sub>) δ 149.2, 144.8, 135.9, 129.5, 128.2, 84.1, 27.9, 21.7.

**The synthetic route of substrates C (tert-butyl pent-4-yn-1-yl(tosyl)carbamate)<sup>2</sup>**

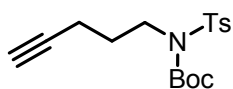

Under argon, a solution of N-(t-butoxycarbonyl)-N-p-toluenesulfonamide (2.5 g, 9.2 mmol), triphenylphosphine (2.9 g, 11.06 mmol) and pent-4-yn-1-ol (0.93 g, 11.06 mmol) in dry THF was chilled to 0 °C. Diisopropyl azodicarboxylate (2.24 g, 11.06 mmol) was then added dropwise. Then the reaction mixture was stirred at room temperature for 10 h. Concentrated in vacuo and purified by flash chromatography on silica gel (petroleum ether/ethyl acetate 10:1) to give tert-butyl pent-4-yn-1-yl(tosyl)carbamate **C** 2.44 g, yield 79%. Mp 90–91 °C. <sup>1</sup>H NMR (400 MHz, CDCl<sub>3</sub>) δ 7.81 (d, *J* = 8.3 Hz, 2H), 7.33 (d, *J* = 8.2 Hz, 2H), 3.94 (t, *J* = 7.1 Hz, 2H), 2.46 (s, 3H), 2.31 (td, *J* = 7.1, 2.5 Hz, 2H), 2.06–1.97 (m, 3H), 1.37 (s, 9H). <sup>13</sup>C NMR (100 MHz, CDCl<sub>3</sub>) δ 150.9, 144.2, 137.3, 129.3, 127.9, 84.3, 83.1, 69.0, 46.3, 28.9, 27.9, 21.6, 16.0.

**The synthetic route of substrates **D** (4-methyl-N-(5-(2-nitrophenyl)pent-4-yn-1-yl)benzenesulfonamide)**

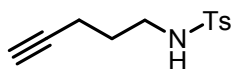

Trifluoroacetic acid (8.0 g, 72.3 mmol) was added dropwise to the solution of *t*-butyl pent-4-yn-1-yl(tosyl)carbamate (2.44 g, 7.23 mmol) in DCM at room temperature. The reaction mixture was stirred for 3 h and then added a saturated aqueous NaHCO<sub>3</sub> solution until the pH of water phase was 8~9. The crude product was extracted with DCM and the combined organic layer was dried over anhydrous Na<sub>2</sub>SO<sub>4</sub>, concentrated in vacuo to give **D** in 95% yield as a white solid. Mp 59–60 °C. <sup>1</sup>H NMR (400 MHz, CDCl<sub>3</sub>): δ 7.76 (d, *J* = 8.4 Hz, 2H), 7.31 (d, *J* = 8.0 Hz, 2H), 5.02–4.93 (m, 2H), 4.91 (t, *J* = 6.4 Hz, 1H), 3.07 (q, *J* = 6.8 Hz, 2H), 2.43 (s, 3H), 2.23 (dt, *J* = 6.8 Hz, 2.8 Hz, 2H), 1.95 (t, *J* = 2.8 Hz, 1H), 1.75–1.64 (m, 2H). <sup>13</sup>C NMR (100 MHz, CDCl<sub>3</sub>): δ 143.4, 136.9, 129.7, 127.1, 82.9, 69.5, 42.1, 28.1, 22.0, 15.7.

**The synthetic route of substrates **E** (4-methyl-N-(5-(2-nitrophenyl)pent-4-yn-1-yl)benzenesulfonamide)<sup>3</sup>**

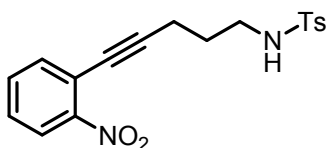

To a three-necked flask were added Pd(PPh<sub>3</sub>)<sub>2</sub>Cl<sub>2</sub> (141 mg, 0.201 mmol), CuI (38 mg, 0.201 mmol), 2-nitroiodobenzene (1.0 g, 4.02 mmol), Et<sub>3</sub>N (2.03 g, 20.1 mmol) and THF. After degassing with argon and four evacuation/backfill-cycles with argon, **D** (1.14 g, 4.82 mmol) in tetrahydrofuran was added dropwise. The reaction mixture was stirred at room temperature. When the reaction was complete as monitored by TLC, H<sub>2</sub>O was added to the resulting mixture. After separation of the organic layer, the water layer

was extracted with DCM. The combined organic layer was dried over anhydrous  $\text{Na}_2\text{SO}_4$ , filtered, concentrated in vacuo and purified by flash chromatography on silica gel (petroleum ether/ethyl acetate 5:1) to give **E** 1.27 g as a yellow oil, yield 88%.  $^1\text{H}$  NMR (400 MHz,  $\text{CDCl}_3$ )  $\delta$  7.99 (d,  $J = 8.2$  Hz, 1H), 7.77 (d,  $J = 8.2$  Hz, 2H), 7.56 – 7.53 (m, 2H), 7.42 (ddd,  $J = 8.7, 5.5, 3.5$  Hz, 1H), 7.29 (d,  $J = 8.2$  Hz, 2H), 4.80 (t,  $J = 6.2$  Hz, 1H), 3.17 (q,  $J = 6.6$  Hz, 2H), 2.55 (t,  $J = 6.7$  Hz, 2H), 2.41 (s, 3H), 1.82 (p,  $J = 6.7$  Hz, 2H).  $^{13}\text{C}$  NMR (100 MHz,  $\text{CDCl}_3$ )  $\delta$  149.7, 143.4, 136.8, 134.9, 132.9, 129.7, 128.3, 127.1, 124.4, 118.8, 97.5, 76.9, 42.1, 28.1, 21.5, 17.0. HRMS (ESI) calcd for  $\text{C}_{18}\text{H}_{19}\text{N}_2\text{O}_4\text{S}$  ( $\text{M}+\text{H}$ ) $^+$  359.1066, found 359.1056.

Similarly, the synthesis other substrate please refer to the procedure of **E**

**N-(5-(4-fluoro-2-nitrophenyl)pent-4-yn-1-yl)-4-methylbenzenesulfonamide**

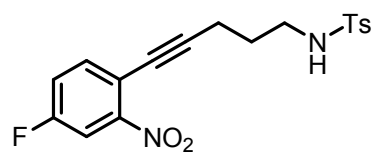

pale brown oil, yield 97%.  $^1\text{H}$  NMR (400 MHz,  $\text{CDCl}_3$ )  $\delta$  7.76 (d,  $J = 8.1$  Hz, 2H), 7.68 (dd,  $J = 8.2, 2.5$  Hz, 1H), 7.53 (dd,  $J = 8.6, 5.5$  Hz, 1H), 7.30 – 7.24 (m, 3H), 5.38 (t,  $J = 6.2$  Hz, 1H), 3.12 (q,  $J = 6.5$  Hz, 2H), 2.50 (t,  $J = 6.8$  Hz, 2H), 2.37 (s, 3H), 1.79 (p,  $J = 6.7$  Hz, 2H).  $^{13}\text{C}$  NMR (100 MHz,  $\text{CDCl}_3$ )  $\delta$  162.0, 159.5, 150.3 ( $J = 9.0$  Hz), 143.4, 136.8, 136.5 ( $J = 8.0$  Hz), 129.7, 127.1, 120.6 ( $J = 21.0$  Hz), 115.2 ( $J = 3.0$  Hz), 112.2 ( $J = 27.0$  Hz), 97.4, 76.0, 42.0, 28.0, 21.5, 16.9. HRMS (ESI) calcd for  $\text{C}_{18}\text{H}_{18}\text{FN}_2\text{O}_4\text{S}$  ( $\text{M}+\text{H}$ ) $^+$  377.0971, found 377.0968.

**N-(5-(4-chloro-2-nitrophenyl)pent-4-yn-1-yl)-4-methylbenzenesulfonamide**

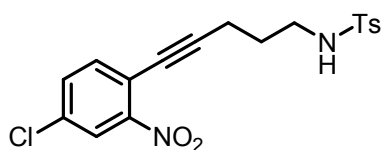

pale yellow powder, yield 90%. Mp 92–93 °C.  $^1\text{H}$  NMR (400 MHz,  $\text{CDCl}_3$ )  $\delta$  8.00 (s, 1H), 7.78 (d,  $J$

= 8.2 Hz, 2H), 7.54 – 7.48 (m, 2H), 7.31 (d,  $J = 8.1$  Hz, 2H), 4.99 (t,  $J = 5.2$  Hz, 1H), 3.16 (q,  $J = 6.6$  Hz, 2H), 2.55 (t,  $J = 6.8$  Hz, 2H), 2.42 (s, 3H), 1.83 (p,  $J = 6.7$  Hz, 2H).  $^{13}\text{C}$  NMR (100 MHz,  $\text{CDCl}_3$ )  $\delta$  150.1, 143.5, 136.8, 135.7, 134.0, 133.0, 129.8, 127.1, 124.7, 117.4, 98.6, 76.3, 42.0, 28.0, 21.5, 17.1. HRMS (ESI) calcd for  $\text{C}_{18}\text{H}_{18}\text{ClN}_2\text{O}_4\text{S}$  ( $\text{M}+\text{H}$ ) $^+$  393.0676, found 393.0677.

**N-(5-(4-bromo-2-nitrophenyl)pent-4-yn-1-yl)-4-methylbenzenesulfonamide**

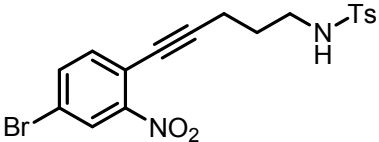 pale yellow oil, yield 73%.  $^1\text{H}$  NMR (400 MHz,  $\text{CDCl}_3$ )  $\delta$  8.15 (s, 1H), 7.78 (d,  $J = 8.2$  Hz, 2H), 7.67 (d,  $J = 8.3$  Hz, 1H), 7.43 (d,  $J = 8.3$  Hz, 1H), 7.31 (d,  $J = 8.2$  Hz, 2H), 4.88 (t,  $J = 6.3$  Hz, 1H), 3.16 (q,  $J = 6.7$  Hz, 2H), 2.55 (t,  $J = 6.7$  Hz, 2H), 2.43 (s, 3H), 1.83 (p,  $J = 6.7$  Hz, 2H).  $^{13}\text{C}$  NMR (100 MHz,  $\text{CDCl}_3$ )  $\delta$  150.1, 143.5, 136.8, 135.9, 135.8, 129.8, 127.6, 127.1, 121.4, 117.8, 98.8, 76.4, 42.0, 28.0, 21.6, 17.1. HRMS (ESI) calcd for  $\text{C}_{18}\text{H}_{18}\text{BrN}_2\text{O}_4\text{S}$  ( $\text{M}+\text{H}$ ) $^+$  437.0171, found 437.0163.

**methyl 4-(5-(4-methylphenylsulfonamido)pent-1-yn-1-yl)-3-nitrobenzoate**

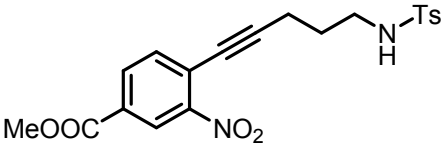 pale brown oil, yield 83%.  $^1\text{H}$  NMR (400 MHz,  $\text{CDCl}_3$ )  $\delta$  8.56 (s, 1H), 8.12 (d,  $J = 8.0$  Hz, 1H), 7.76 (d,  $J = 8.0$  Hz, 2H), 7.58 (d,  $J = 8.1$  Hz, 1H), 7.26 (d,  $J = 7.9$  Hz, 2H), 5.40 (t,  $J = 6.0$  Hz, 1H), 3.94 (s, 3H), 3.12 (q,  $J = 6.7$  Hz, 2H), 2.55 (t,  $J = 6.7$  Hz, 2H), 2.37 (s, 3H), 1.82 (p,  $J = 6.7$  Hz, 2H).  $^{13}\text{C}$  NMR (100 MHz,  $\text{CDCl}_3$ )  $\delta$  164.6, 149.7, 143.4, 136.8, 135.1, 133.0, 129.9, 129.7, 127.1, 125.5, 123.0, 101.4, 76.7, 52.9, 42.0, 28.0, 21.5, 17.2. HRMS (ESI) calcd for  $\text{C}_{20}\text{H}_{21}\text{N}_2\text{O}_6\text{S}$  ( $\text{M}+\text{H}$ ) $^+$  417.1120, found 417.1117.

**4-methyl-N-(5-(4-methyl-2-nitrophenyl)pent-4-yn-1-yl)benzenesulfonamide**

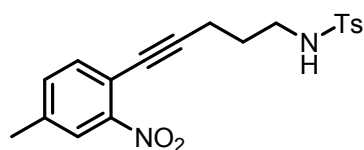

reddish brown oil, yield 81%. <sup>1</sup>H NMR (400 MHz,

CDCl<sub>3</sub>) δ 7.82 – 7.75 (m, 3H), 7.43 (d, *J* = 7.9 Hz, 1H),

7.35 (d, *J* = 8.1 Hz, 1H), 7.30 (d, *J* = 8.2 Hz, 2H), 5.00 (t, *J* = 5.8 Hz, 1H), 3.17 (q, *J* =

6.6 Hz, 2H), 2.53 (t, *J* = 6.7 Hz, 2H), 2.43 (s, 3H), 2.41 (s, 3H), 1.82 (p, *J* = 6.6 Hz,

2H). <sup>13</sup>C NMR (100 MHz, CDCl<sub>3</sub>) δ 149.7, 143.4, 139.1, 136.8, 134.5, 133.7, 129.7,

127.1, 124.8, 115.9, 96.1, 77.1, 42.1, 28.1, 21.5, 21.2, 17.0. HRMS (ESI) calcd for

C<sub>19</sub>H<sub>21</sub>N<sub>2</sub>O<sub>4</sub>S (M+H)<sup>+</sup> 373.1222, found 373.1221.

**N-(5-(4-methoxy-2-nitrophenyl)pent-4-yn-1-yl)-4-**

**methylbenzenesulfonamide**

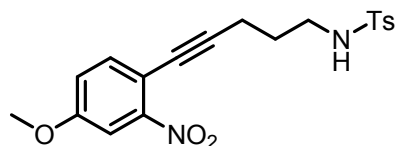

pale brown oil, yield 87%. <sup>1</sup>H NMR (400 MHz,

CDCl<sub>3</sub>) δ 7.77 (d, *J* = 7.8 Hz, 2H), 7.47 (s, 1H), 7.43

(d, *J* = 8.6 Hz, 1H), 7.28 (d, *J* = 7.7 Hz, 2H), 7.07 (d, *J* = 8.4 Hz, 1H), 5.28 (s, 1H),

3.86 (s, 3H), 3.14 (q, *J* = 6.2 Hz, 2H), 2.50 (t, *J* = 6.2 Hz, 2H), 2.39 (s, 3H), 1.79 (p, *J*

= 6.2 Hz, 2H). <sup>13</sup>C NMR (100 MHz, CDCl<sub>3</sub>) δ 159.0, 150.6, 143.4, 136.9, 135.7,

129.7, 127.1, 119.7, 111.0, 109.2, 95.2, 76.8, 56.0, 42.1, 28.1, 21.5, 17.0. HRMS (ESI)

calcd for C<sub>19</sub>H<sub>21</sub>N<sub>2</sub>O<sub>5</sub>S (M+H)<sup>+</sup> 389.1171, found 389.1173.

**4-methyl-N-(5-(5-methyl-2-nitrophenyl)pent-4-yn-1-yl)benzenesulfonamide**

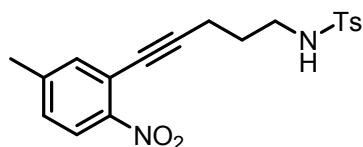

yellow oil, yield 91%. <sup>1</sup>H NMR (400 MHz, CDCl<sub>3</sub>)

δ 7.91 (d, *J* = 8.2 Hz, 1H), 7.78 (d, *J* = 7.5 Hz, 2H),

7.34 (s, 1H), 7.28 (d, *J* = 7.4 Hz, 2H), 7.19 (d, *J* = 8.0 Hz, 1H), 5.13 (s, 1H), 3.16 (q, *J*

= 6.2 Hz, 2H), 2.53 (t, *J* = 6.2 Hz, 2H), 2.39 (s, 6H), 1.81 (p, *J* = 6.2 Hz, 2H). <sup>13</sup>C



NMR (100 MHz, CDCl<sub>3</sub>)  $\delta$  147.5, 144.1, 143.4, 136.8, 135.2, 129.7, 129.0, 127.1, 124.7, 118.9, 96.8, 77.4, 42.1, 28.1, 21.5, 21.2, 17.0. HRMS (ESI) calcd for C<sub>19</sub>H<sub>21</sub>N<sub>2</sub>O<sub>4</sub>S (M+H)<sup>+</sup> 373.1222, found 373.1209.

**N-(5-(5-fluoro-2-nitrophenyl)pent-4-yn-1-yl)-4-methylbenzenesulfonamide**

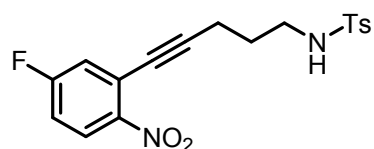

brown oil, yield 94%. <sup>1</sup>H NMR (400 MHz, CDCl<sub>3</sub>)

$\delta$  8.06 (dd, *J* = 9.0, 5.1 Hz, 1H), 7.78 (d, *J* = 7.9 Hz, 2H), 7.29 (d, *J* = 7.8 Hz, 2H), 7.20 (dd, *J* = 8.5, 2.4 Hz, 1H), 7.14 – 7.06 (m, 1H), 5.25 (t, *J* = 5.9 Hz, 1H), 3.14 (q, *J* = 6.5 Hz, 2H), 2.55 (t, *J* = 6.7 Hz, 2H), 2.40 (s, 3H), 1.82 (p, *J* = 6.7 Hz, 2H). <sup>13</sup>C NMR (100 MHz, CDCl<sub>3</sub>)  $\delta$  165.6, 163.0, 146.0, 143.5, 136.7, 129.8, 127.3 (*J* = 10.0 Hz), 127.1, 121.8 (*J* = 11.0 Hz), 121.4 (*J* = 25.0 Hz), 115.7 (*J* = 23.0 Hz), 99.2, 76.3, 42.0, 27.9, 21.5, 17.0. HRMS (ESI) calcd for C<sub>18</sub>H<sub>18</sub>FN<sub>2</sub>O<sub>4</sub>S (M+H)<sup>+</sup> 377.0971, found 377.0968.

**N-(5-(5-chloro-2-nitrophenyl)pent-4-yn-1-yl)-4-methylbenzenesulfonamide**

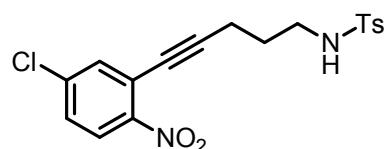

brown oil, yield 98%. <sup>1</sup>H NMR (400 MHz,

CDCl<sub>3</sub>)  $\delta$  7.85 (d, *J* = 8.8 Hz, 1H), 7.69 (d, *J* = 8.2 Hz, 2H), 7.39 (d, *J* = 2.2 Hz, 1H), 7.26 (dd, *J* = 8.8, 2.2 Hz, 1H), 7.19 (d, *J* = 7.8 Hz, 2H), 5.30 (t, *J* = 6.3 Hz, 1H), 3.03 (q, *J* = 6.6 Hz, 2H), 2.44 (t, *J* = 6.8 Hz, 2H), 2.29 (s, 3H), 1.72 (p, *J* = 6.7 Hz, 2H). <sup>13</sup>C NMR (100 MHz, CDCl<sub>3</sub>)  $\delta$  148.0, 143.4, 139.2, 136.8, 134.4, 129.7, 128.4, 127.1, 125.9, 120.6, 99.3, 76.1, 42.0, 28.0, 21.5, 17.0. HRMS (ESI) calcd for C<sub>18</sub>H<sub>18</sub>ClN<sub>2</sub>O<sub>4</sub>S (M+H)<sup>+</sup> 393.0676, found 393.0679.

**N-(5-(5-bromo-2-nitrophenyl)pent-4-yn-1-yl)-4-methylbenzenesulfonamide**

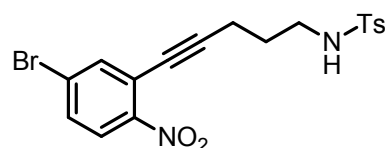

yellow oil, yield 88%. <sup>1</sup>H NMR (400 MHz,

CDCl<sub>3</sub>)  $\delta$  7.86 (d,  $J$  = 8.8 Hz, 1H), 7.78 (d,  $J$  = 8.1 Hz, 2H), 7.66 (d,  $J$  = 1.9 Hz, 1H), 7.52 (dd,  $J$  = 8.8, 2.0 Hz, 1H), 7.28 (d,  $J$  = 7.9 Hz, 2H), 5.33 (t,  $J$  = 6.1 Hz, 1H), 3.12 (q,  $J$  = 6.5 Hz, 2H), 2.53 (t,  $J$  = 6.8 Hz, 2H), 2.38 (s, 3H), 1.81 (p,  $J$  = 6.7 Hz, 2H). <sup>13</sup>C NMR (100 MHz, CDCl<sub>3</sub>)  $\delta$  148.5, 143.5, 137.4, 136.8, 131.4, 129.8, 127.6, 127.1, 125.9, 120.7, 99.3, 76.0, 42.0, 28.0, 21.5, 17.0. HRMS (ESI) calcd for C<sub>18</sub>H<sub>18</sub>BrN<sub>2</sub>O<sub>4</sub>S (M+H)<sup>+</sup> 437.0171, found 437.0163.

**N-(5-(2-chloro-6-nitrophenyl)pent-4-yn-1-yl)-4-methylbenzenesulfonamide**

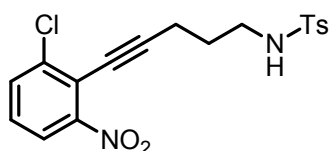

colourless oil, yield 45%. <sup>1</sup>H NMR (400 MHz, CDCl<sub>3</sub>)  $\delta$  7.82 (d,  $J$  = 8.3 Hz, 1H), 7.78 (d,  $J$  = 8.1 Hz, 2H), 7.64 (d,  $J$  = 8.1 Hz, 1H), 7.39 – 7.31 (m, 1H), 7.28 (d,  $J$  = 8.1 Hz, 2H), 5.25 (t,  $J$  = 5.3 Hz, 1H), 3.17 (q,  $J$  = 6.6 Hz, 2H), 2.59 (t,  $J$  = 6.7 Hz, 2H), 2.39 (s, 3H), 1.84 (p,  $J$  = 6.7 Hz, 2H). <sup>13</sup>C NMR (100 MHz, CDCl<sub>3</sub>)  $\delta$  150.5, 142.4, 137.5, 135.8, 132.4, 128.7, 127.0, 126.1, 121.5, 117.4, 102.9, 72.6, 41.0, 26.9, 20.5, 16.2. HRMS (ESI) calcd for C<sub>18</sub>H<sub>18</sub>ClN<sub>2</sub>O<sub>4</sub>S (M+H)<sup>+</sup> 393.0676, found 393.0665.

**4-methyl-N-(5-(3-methyl-2-nitrophenyl)pent-4-yn-1-yl)benzenesulfonamide**

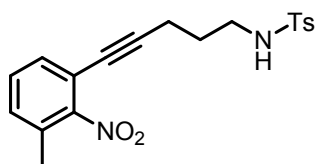

brown oil, yield 88%. <sup>1</sup>H NMR (400 MHz, CDCl<sub>3</sub>)  $\delta$  7.72 (d,  $J$  = 7.6 Hz, 2H), 7.27 – 7.20 (m, 4H), 7.17 – 7.12 (m, 1H), 5.14 (t,  $J$  = 5.3 Hz, 1H), 3.02 (q,  $J$  = 5.9 Hz, 2H), 2.41 – 2.32 (m, 5H), 2.25 (s, 3H), 1.68 (p,  $J$  = 6.6 Hz, 2H). <sup>13</sup>C NMR (100 MHz, CDCl<sub>3</sub>)  $\delta$  152.9, 143.4, 136.9, 130.7, 130.7, 129.9, 129.8, 127.1, 116.6, 95.4, 75.2, 42.0, 28.1, 21.5, 17.4, 16.7. HRMS (ESI) calcd for C<sub>19</sub>H<sub>21</sub>N<sub>2</sub>O<sub>4</sub>S (M+H)<sup>+</sup> 373.1222, found 373.1215.

**N-(5-(3-chloro-2-nitrophenyl)pent-4-yn-1-yl)-4-methylbenzenesulfonamide**

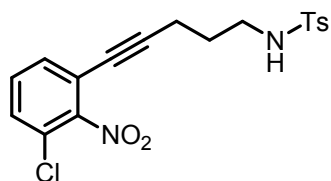

brown oil, yield 95%.  $^1\text{H}$  NMR (400 MHz,  $\text{CDCl}_3$ )  $\delta$

7.77 (d,  $J = 8.2$  Hz, 2H), 7.42 – 7.26 (m, 5H), 5.24 (t,  $J =$

5.6 Hz, 1H), 3.05 (q,  $J = 6.7$  Hz, 2H), 2.44 (t,  $J = 6.9$  Hz,

2H), 2.40 (s, 3H), 1.75 (p,  $J = 6.8$  Hz, 2H).  $^{13}\text{C}$  NMR (100 MHz,  $\text{CDCl}_3$ )  $\delta$  151.1,

143.5, 136.8, 131.5, 130.7, 129.8, 129.7, 127.1, 124.9, 118.5, 97.4, 74.0, 41.9, 28.0,

21.5, 16.7. HRMS (ESI) calcd for  $\text{C}_{18}\text{H}_{18}\text{ClN}_2\text{O}_4\text{S}$  ( $\text{M}+\text{H}$ ) $^+$  393.0676, found 393.0675.

**N-(5-(4-(tert-butyl)-2-nitrophenyl)pent-4-yn-1-yl)-4-**

**methylbenzenesulfonamide**

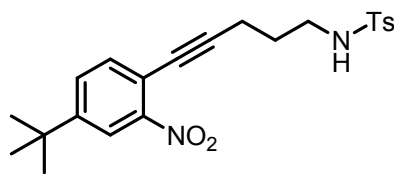

brown oil, yield 87%.  $^1\text{H}$  NMR (400 MHz,

$\text{CDCl}_3$ )  $\delta$  7.97 (s, 1H), 7.78 (d,  $J = 7.9$  Hz, 2H), 7.55

(d,  $J = 8.2$  Hz, 1H), 7.46 (d,  $J = 8.2$  Hz, 1H), 7.27 (d,

$J = 8.1$  Hz, 2H), 5.27 (t,  $J = 6.0$  Hz, 1H), 3.14 (q,  $J = 6.4$  Hz, 2H), 2.51 (t,  $J = 6.7$  Hz,

2H), 2.38 (s, 3H), 1.80 (p,  $J = 6.6$  Hz, 2H), 1.33 (s, 9H).  $^{13}\text{C}$  NMR (100 MHz,  $\text{CDCl}_3$ )

$\delta$  152.4, 149.7, 143.4, 136.8, 134.5, 130.1, 129.7, 127.1, 121.3, 116.0, 96.2, 77.1, 42.1,

35.1, 30.9, 28.1, 21.5, 17.0. HRMS (ESI) calcd for  $\text{C}_{22}\text{H}_{27}\text{N}_2\text{O}_4\text{S}$  ( $\text{M}+\text{H}$ ) $^+$  415.1692,

found 415.1684.

**4-methyl-N-(6-(2-nitrophenyl)hex-5-yn-1-yl)benzenesulfonamide**

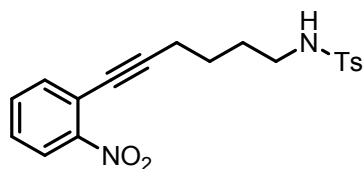

yellow oil, yield 87%.  $^1\text{H}$  NMR (400 MHz,  $\text{CDCl}_3$ )

$\delta$  7.95 (d,  $J = 8.1$  Hz, 1H), 7.76 (d,  $J = 8.2$  Hz, 2H),

7.56 – 7.49 (m, 2H), 7.40 (ddd,  $J = 8.5, 6.7, 2.2$  Hz, 1H),

7.28 (d,  $J = 8.1$  Hz, 2H), 5.15 (t,  $J = 6.1$  Hz, 1H), 2.99 (q,  $J = 6.3$  Hz, 2H), 2.44 (t,  $J =$

6.5 Hz, 2H), 2.39 (s, 3H), 1.77 – 1.58 (m, 4H). <sup>13</sup>C NMR (100 MHz, CDCl<sub>3</sub>) δ 149.9, 143.4, 136.8, 134.8, 132.8, 129.7, 128.1, 127.1, 124.4, 119.0, 98.4, 76.5, 42.7, 28.4, 25.1, 21.5, 19.2. HRMS (ESI) calcd for C<sub>19</sub>H<sub>21</sub>N<sub>2</sub>O<sub>4</sub>S (M+H)<sup>+</sup> 373.1222, found 373.1213.

**N-(5-(4,5-dimethyl-2-nitrophenyl)pent-4-yn-1-yl)-4-**

**methylbenzenesulfonamide**

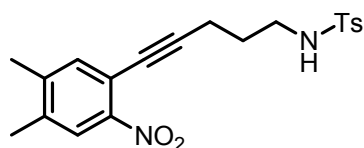

brown oil, yield 88%. <sup>1</sup>H NMR (400 MHz, CDCl<sub>3</sub>)

δ 7.80 – 7.74 (m, 3H), 7.29 – 7.23 (m, 3H), 5.33 (t, *J* = 5.9 Hz, 1H), 3.14 (q, *J* = 6.4 Hz, 2H), 2.50 (t, *J* = 6.7 Hz, 2H), 2.37 (s, 3H), 2.29 (s, 3H), 2.27 (s, 3H), 1.80 (p, *J* = 6.7 Hz, 2H). <sup>13</sup>C NMR (100 MHz, CDCl<sub>3</sub>) δ 147.3, 143.3, 143.0, 137.7, 136.9, 135.5, 129.7, 127.1, 125.3, 116.2, 95.9, 77.4, 42.1, 28.1, 21.5, 19.6, 19.6, 17.0. HRMS (ESI) calcd for C<sub>20</sub>H<sub>23</sub>N<sub>2</sub>O<sub>4</sub>S (M+H)<sup>+</sup> 387.1379, found 387.1379.

**N-(5-(4,5-dichloro-2-nitrophenyl)pent-4-yn-1-yl)-4-**

**methylbenzenesulfonamide**

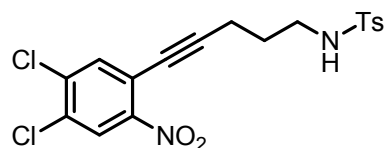

yellow oil, yield 89%. <sup>1</sup>H NMR (400 MHz,

CDCl<sub>3</sub>) δ 8.05 (s, 1H), 7.72 (d, *J* = 7.1 Hz, 2H), 7.56 (s, 1H), 7.23 (d, *J* = 6.8 Hz, 2H), 5.30 (s, 1H), 3.06 (q, *J* = 6.4 Hz, 2H), 2.48 (t, *J* = 6.4 Hz, 2H), 2.34 (s, 3H), 1.76 (p, *J* = 6.4 Hz, 2H). <sup>13</sup>C NMR (100 MHz, CDCl<sub>3</sub>) δ 147.8, 143.5, 137.8, 136.8, 135.8, 132.4, 129.7, 127.1, 126.4, 118.6, 100.1, 75.4, 41.9, 27.9, 21.5, 17.1. HRMS (ESI) calcd for C<sub>18</sub>H<sub>17</sub>Cl<sub>2</sub>N<sub>2</sub>O<sub>4</sub>S (M+H)<sup>+</sup> 427.0286, found 427.0282.

#### 4-methyl-N-(5-(2-nitro-4-(trifluoromethyl)phenyl)pent-4-yn-1-

#### yl)benzenesulfonamide

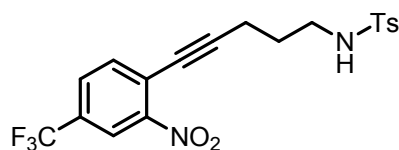

brown oil, yield 60%.  $^1\text{H}$  NMR (400 MHz,

$\text{CDCl}_3$ )  $\delta$  8.21 (s, 1H), 7.73 (d,  $J = 8.1$  Hz, 3H), 7.65

(d,  $J = 8.2$  Hz, 1H), 7.25 (d,  $J = 8.0$  Hz, 2H), 5.18 (t,  $J = 6.2$  Hz, 1H), 3.10 (q,  $J = 6.5$

Hz, 2H), 2.54 (t,  $J = 6.8$  Hz, 2H), 2.36 (s, 3H), 1.80 (p,  $J = 6.7$  Hz, 2H).  $^{13}\text{C}$  NMR

(100 MHz,  $\text{CDCl}_3$ )  $\delta$  149.7, 143.5, 136.8, 135.7, 130.2 ( $J = 34.3$  Hz), 129.7, 129.2 ( $J$

$= 3.3$  Hz), 127.1, 122.7 ( $J = 271.0$  Hz), 122.6, 121.8 ( $J = 3.9$  Hz), 101.2, 76.2, 42.0,

27.9, 21.5, 17.1. HRMS (ESI) calcd for  $\text{C}_{19}\text{H}_{18}\text{F}_3\text{N}_2\text{O}_4\text{S}$  ( $\text{M}+\text{H}$ ) $^+$  427.0939, found

427.3771.

#### 4-methyl-N-(6-(4-methyl-2-nitrophenyl)hex-5-yn-1-yl)benzenesulfonamide

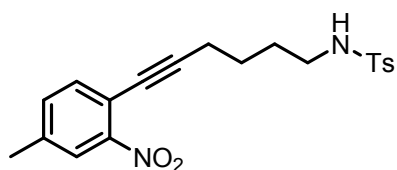

yellow oil, yield 83%.  $^1\text{H}$  NMR (400 MHz,

$\text{CDCl}_3$ )  $\delta$  7.80 – 7.73 (m, 3H), 7.42 (d,  $J = 7.9$  Hz,

1H), 7.34 – 7.25 (m, 3H), 5.16 (t,  $J = 5.6$  Hz, 1H),

2.98 (q,  $J = 6.4$  Hz, 2H), 2.46 – 2.36 (m, 8H), 1.73 – 1.57 (m, 4H).  $^{13}\text{C}$  NMR (100

MHz,  $\text{CDCl}_3$ )  $\delta$  149.7, 143.3, 138.9, 136.9, 134.5, 133.6, 129.7, 127.1, 124.7, 116.1,

97.2, 76.5, 42.7, 28.4, 25.2, 21.5, 21.1, 19.2. HRMS (ESI) calcd for  $\text{C}_{20}\text{H}_{23}\text{N}_2\text{O}_4\text{S}$

( $\text{M}+\text{H}$ ) $^+$  387.1379, found 387.1375.

#### N-(6-(4-bromo-2-nitrophenyl)hex-5-yn-1-yl)-4-methylbenzenesulfonamide

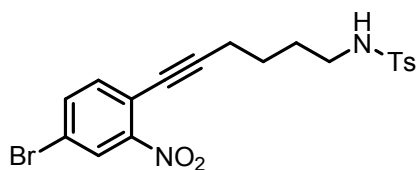

yellow oil, yield 73%.  $^1\text{H}$  NMR (400 MHz,

$\text{CDCl}_3$ )  $\delta$  8.10 (s, 1H), 7.76 (d,  $J = 8.1$  Hz, 2H),

7.63 (d,  $J = 8.2$  Hz, 1H), 7.41 (d,  $J = 8.3$  Hz, 1H),

7.29 (d,  $J = 8.0$  Hz, 2H), 5.13 (t,  $J = 6.0$  Hz, 1H), 2.98 (q,  $J = 6.1$  Hz, 2H), 2.48 – 2.37 (m, 5H), 1.72 – 1.59 (m, 4H).  $^{13}\text{C}$  NMR (100 MHz,  $\text{CDCl}_3$ )  $\delta$  150.1, 143.4, 136.8, 135.9, 135.8, 129.7, 127.4, 127.1, 121.2, 118.0, 99.9, 75.9, 42.6, 28.5, 25.0, 21.5, 19.3. HRMS (ESI) calcd for  $\text{C}_{19}\text{H}_{20}\text{BrN}_2\text{O}_4\text{S}$  ( $\text{M}+\text{H}$ ) $^+$  451.0327, found 451.0323.

#### 5-(2-nitrophenyl)pent-4-yn-1-ol

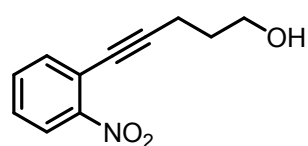

brown oil, yield 59%.  $^1\text{H}$  NMR (400 MHz,  $\text{CDCl}_3$ )  $\delta$  7.97 (d,  $J = 8.2$  Hz, 1H), 7.56 (t,  $J = 7.0$  Hz, 1H), 7.52 (d,  $J = 7.7$  Hz, 1H), 7.43 – 7.37 (t,  $J = 7.0$  Hz, 1H), 3.84 (t,  $J = 6.1$  Hz, 2H), 2.62 (t,  $J = 6.9$  Hz, 2H), 2.32 (br, 1H), 1.89 (p,  $J = 6.5$  Hz, 2H).  $^{13}\text{C}$  NMR (100 MHz,  $\text{CDCl}_3$ )  $\delta$  150.0, 135.0, 132.9, 128.2, 124.6, 119.2, 98.7, 76.5, 61.4, 31.1, 16.54. ESI-MS:  $m/z$  206.4 (100%,  $[\text{M}+\text{H}]^+$ ).

#### N-(5-(2-nitrophenyl)pent-4-yn-1-yl)benzenesulfonamide

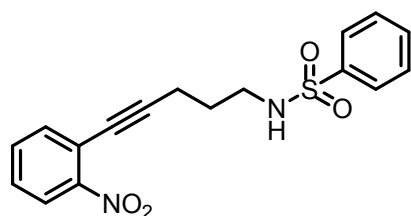

brown oil, yield 93%.  $^1\text{H}$  NMR (400 MHz,  $\text{CDCl}_3$ )  $\delta$  7.95 (d,  $J = 8.2$  Hz, 1H), 7.90 (d,  $J = 7.8$  Hz, 2H), 7.57 – 7.45 (m, 5H), 7.40 (dt,  $J = 8.4, 4.3$  Hz, 1H), 5.34 (s, 1H), 3.16 (q,  $J = 6.2$  Hz, 2H), 2.52 (t,  $J = 6.6$  Hz, 2H), 1.81 (p,  $J = 6.5$  Hz, 2H).  $^{13}\text{C}$  NMR (100 MHz,  $\text{CDCl}_3$ )  $\delta$  149.8, 139.8, 134.9, 132.9, 132.7, 129.2, 128.3, 127.1, 124.5, 118.8, 97.4, 77.0, 42.1, 28.1, 17.0. HRMS (ESI) calcd for  $\text{C}_{17}\text{H}_{17}\text{N}_2\text{O}_4\text{S}$  ( $\text{M}+\text{H}$ ) $^+$  345.0909, found 345.0909.

#### 4-methoxy-N-(5-(2-nitrophenyl)pent-4-yn-1-yl)benzenesulfonamide

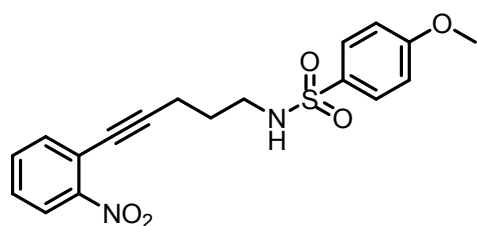

yellow oil, yield 98%.  $^1\text{H}$  NMR (400 MHz,  $\text{CDCl}_3$ )  $\delta$  7.95 (d,  $J = 8.2$  Hz, 1H), 7.82

(d,  $J = 8.8$  Hz, 2H), 7.53 – 7.49 (m, 2H), 7.39 (dt,  $J = 8.6, 4.4$  Hz, 1H), 6.93 (d,  $J = 8.8$  Hz, 2H), 5.23 (t,  $J = 6.2$  Hz, 1H), 3.81 (s, 3H), 3.13 (q,  $J = 6.5$  Hz, 2H), 2.51 (t,  $J = 6.7$  Hz, 2H), 1.80 (p,  $J = 6.7$  Hz, 2H).  $^{13}\text{C}$  NMR (100 MHz,  $\text{CDCl}_3$ )  $\delta$  162.8, 149.8, 134.8, 132.8, 131.3, 129.2, 128.2, 124.5, 118.8, 114.3, 97.4, 77.0, 55.6, 42.0, 28.0, 17.0. HRMS (ESI) calcd for  $\text{C}_{18}\text{H}_{19}\text{N}_2\text{O}_5\text{S}$  ( $\text{M}+\text{H}$ ) $^+$  375.1015, found 375.1016.

**4-(tert-butyl)-N-(5-(2-nitrophenyl)pent-4-yn-1-yl)benzenesulfonamide**

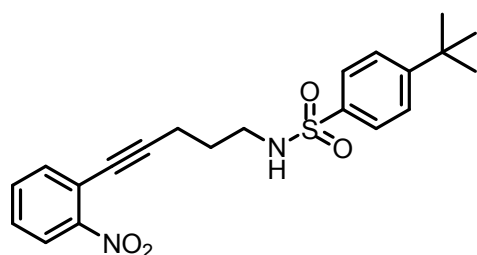

yellow oil, yield 98%.  $^1\text{H}$  NMR (400 MHz,  $\text{CDCl}_3$ )  $\delta$  7.91 (d,  $J = 8.2$  Hz, 1H), 7.81 (d,  $J = 8.4$  Hz, 2H), 7.52 – 7.44 (m, 4H), 7.39 – 7.32 (m, 1H), 5.50 (t,  $J = 6.1$  Hz, 1H), 3.13

(q,  $J = 6.5$  Hz, 2H), 2.50 (t,  $J = 6.8$  Hz, 2H), 1.80 (p,  $J = 6.7$  Hz, 2H), 1.27 (s, 9H).  $^{13}\text{C}$  NMR (100 MHz,  $\text{CDCl}_3$ )  $\delta$  156.3, 149.8, 136.9, 134.8, 132.8, 128.2, 127.0, 126.1, 124.4, 118.8, 97.5, 76.9, 42.1, 35.0, 31.0, 28.2, 17.0. HRMS (ESI) calcd for  $\text{C}_{21}\text{H}_{25}\text{N}_2\text{O}_4\text{S}$  ( $\text{M}+\text{H}$ ) $^+$  401.1535, found 401.1531.

**4-chloro-N-(5-(2-nitrophenyl)pent-4-yn-1-yl)benzenesulfonamide**

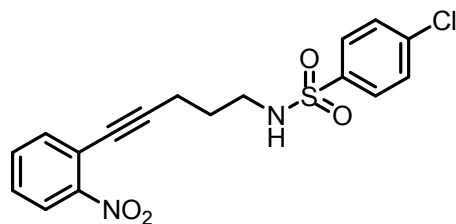

white powder, yield 96%. Mp 88–89 °C.  $^1\text{H}$  NMR (400 MHz,  $\text{CDCl}_3$ )  $\delta$  8.01 (d,  $J = 8.3$  Hz, 1H), 7.85 (d,  $J = 8.6$  Hz, 2H), 7.58 – 7.53 (m,

2H), 7.48 (d,  $J = 8.6$  Hz, 2H), 7.46 – 7.40 (m, 1H), 5.10 (t,  $J = 5.7$  Hz, 1H), 3.21 (q,  $J = 6.6$  Hz, 2H), 2.57 (t,  $J = 6.7$  Hz, 2H), 1.85 (p,  $J = 6.7$  Hz, 2H).  $^{13}\text{C}$  NMR (100 MHz,  $\text{CDCl}_3$ )  $\delta$  149.9, 139.1, 138.4, 134.7, 132.9, 129.4, 128.6, 128.3, 124.6, 118.8, 97.1, 77.3, 42.1, 28.0, 17.0. HRMS (ESI) calcd for  $\text{C}_{17}\text{H}_{16}\text{ClN}_2\text{O}_4\text{S}$  ( $\text{M}+\text{H}$ ) $^+$  379.0519,

found 379.0522.

**4-bromo-N-(5-(2-nitrophenyl)pent-4-yn-1-yl)benzenesulfonamide**

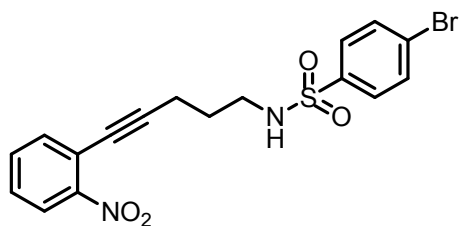

white powder, yield 95%. Mp 76–77 °C.

$^1\text{H}$  NMR (400 MHz,  $\text{CDCl}_3$ )  $\delta$  7.99 (d,  $J = 8.2$  Hz, 1H), 7.77 (d,  $J = 8.5$  Hz, 2H), 7.62 (d,  $J = 8.5$  Hz, 2H), 7.58 – 7.51 (m, 2H), 7.47 – 7.38 (m, 1H), 5.18 (t,  $J = 6.1$  Hz, 1H), 3.19 (q,  $J = 6.5$  Hz, 2H), 2.55 (t,  $J = 6.6$  Hz, 2H), 1.83 (p,  $J = 6.7$  Hz, 2H).  $^{13}\text{C}$  NMR (100 MHz,  $\text{CDCl}_3$ )  $\delta$  149.8, 138.9, 134.8, 132.9, 132.4, 128.7, 128.3, 127.6, 124.6, 118.8, 97.1, 77.2, 42.1, 28.0, 17.0. HRMS (ESI) calcd for  $\text{C}_{17}\text{H}_{16}\text{BrN}_2\text{O}_4\text{S}$  ( $\text{M}+\text{H}$ ) $^+$  423.0014, found 423.0015.

**N-(5-(2-nitrophenyl)pent-4-yn-1-yl)thiophene-2-sulfonamide**

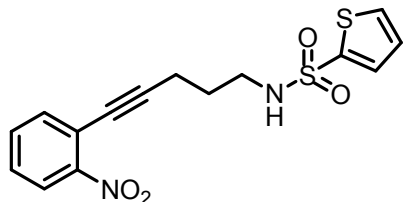

brown oil, yield 94%.  $^1\text{H}$  NMR (400 MHz,

$\text{CDCl}_3$ )  $\delta$  7.92 (d,  $J = 8.2$  Hz, 1H), 7.61 (dd,  $J = 3.7$ , 1.1 Hz, 1H), 7.54 (dd,  $J = 5.0$ , 1.1 Hz, 1H), 7.52 – 7.47 (m, 2H), 7.37 (ddd,  $J = 8.6$ , 6.0, 3.0 Hz, 1H), 7.03 (dd,  $J = 4.9$ , 3.8 Hz, 1H), 5.40 (t,  $J = 6.0$  Hz, 1H), 3.22 (q,  $J = 6.5$  Hz, 2H), 2.52 (t,  $J = 6.8$  Hz, 2H), 1.82 (p,  $J = 6.7$  Hz, 2H).  $^{13}\text{C}$  NMR (100 MHz,  $\text{CDCl}_3$ )  $\delta$  149.8, 140.7, 134.9, 132.9, 132.2, 132.0, 128.3, 127.6, 124.5, 118.8, 97.4, 77.1, 42.4, 28.0, 17.1. HRMS (ESI) calcd for  $\text{C}_{15}\text{H}_{15}\text{N}_2\text{O}_4\text{S}_2$  ( $\text{M}+\text{H}$ ) $^+$  351.0473, found 351.0470.

**N-(5-(2-nitrophenyl)pent-4-yn-1-yl)cyclopropanesulfonamide**

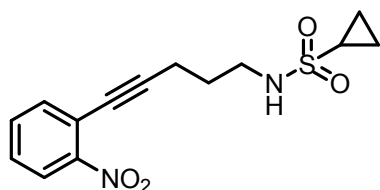

brown oil, yield 82%.  $^1\text{H}$  NMR (400 MHz,

$\text{CDCl}_3$ )  $\delta$  7.90 (d,  $J = 8.2$  Hz, 1H), 7.55 – 7.45 (m,



2H), 7.36 (t,  $J = 7.9$  Hz, 1H), 5.10 (t,  $J = 5.2$  Hz, 1H), 3.32 (q,  $J = 6.3$  Hz, 2H), 2.55 (t,  $J = 6.7$  Hz, 2H), 2.47 (ddd,  $J = 12.6, 8.1, 4.9$  Hz, 1H), 1.86 (p,  $J = 6.6$  Hz, 2H), 1.15 – 1.07 (m, 2H), 1.00 – 0.92 (m, 2H).  $^{13}\text{C}$  NMR (100 MHz,  $\text{CDCl}_3$ )  $\delta$  149.8, 134.8, 132.9, 128.3, 124.4, 118.7, 97.5, 76.9, 42.2, 29.8, 28.7, 17.0, 5.3. HRMS (ESI) calcd for  $\text{C}_{14}\text{H}_{17}\text{N}_2\text{O}_4\text{S}$  ( $\text{M}+\text{H}$ ) $^+$  309.0909, found 309.0907.

#### **N-(5-(2-nitrophenyl)pent-4-yn-1-yl)methanesulfonamide**

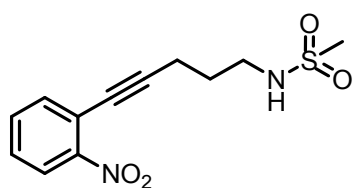

brown oil, yield 37%.  $^1\text{H}$  NMR (400 MHz,  $\text{CDCl}_3$ )  $\delta$  7.99 (d,  $J = 8.2$  Hz, 1H), 7.62 – 7.52 (m, 2H), 7.43 (t,  $J = 7.5$  Hz, 1H), 4.90 (t,  $J = 5.6$  Hz, 1H), 3.38 (q,  $J = 6.6$  Hz, 2H), 3.02 (s, 3H), 2.62 (t,  $J = 6.6$  Hz, 2H), 1.92 (p,  $J = 6.7$  Hz, 2H).  $^{13}\text{C}$  NMR (100 MHz,  $\text{CDCl}_3$ )  $\delta$  149.9, 134.8, 132.9, 128.3, 124.5, 118.8, 97.2, 77.2, 42.1, 40.1, 28.4, 17.0. HRMS (ESI) calcd for  $\text{C}_{12}\text{H}_{18}\text{N}_3\text{O}_4\text{S}$  ( $\text{M}+\text{NH}_4$ ) $^+$  300.1018, found 300.1020.

#### **N-(5-(2-nitrophenyl)pent-4-yn-1-yl)benzamide**

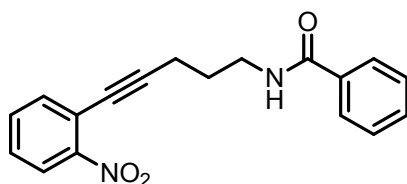

brown oil, yield 80%.  $^1\text{H}$  NMR (400 MHz,  $\text{CDCl}_3$ )  $\delta$  7.98 (d,  $J = 8.0$  Hz, 1H), 7.78 (d,  $J = 7.2$  Hz, 2H), 7.57 – 7.49 (m, 2H), 7.47 – 7.32 (m, 4H), 6.84 (t,  $J = 6.1$  Hz, 1H), 3.65 (q,  $J = 6.5$  Hz, 2H), 2.59 (t,  $J = 6.8$  Hz, 2H), 1.98 (p,  $J = 6.7$  Hz, 2H).  $^{13}\text{C}$  NMR (100 MHz,  $\text{CDCl}_3$ )  $\delta$  167.9, 149.9, 134.8, 134.5, 132.8, 131.4, 128.5, 128.2, 127.0, 124.5, 118.9, 98.1, 77.0, 39.3, 27.7, 17.5. HRMS (ESI) calcd for  $\text{C}_{18}\text{H}_{17}\text{N}_2\text{O}_3$  ( $\text{M}+\text{H}$ ) $^+$  309.1239, found 309.1239.

#### **General procedure for spiro-pseudoindoxyl from *o*-alkynylnitrobenzene<sup>4,5</sup>**

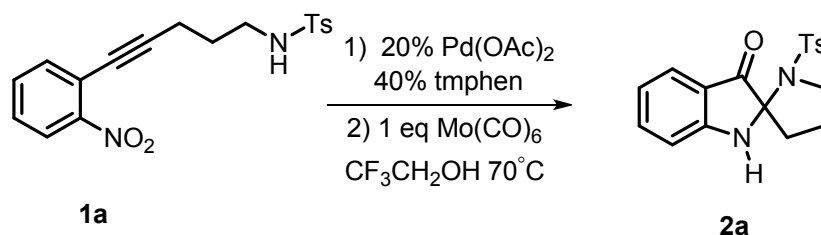

In a 10 mL Schlenk tube, under a argon atmosphere, was added *o*-alkynylnitrobenzene (50 mg, 0.14 mmol) followed by Pd(OAc)<sub>2</sub> (6.26 mg, 0.028 mmol), tetramethylphenanthroline (13 mg, 0.056 mmol), Mo(CO)<sub>6</sub> (37 mg, 0.14 mmol) in 2.0 mL of TFE. The Schlenk tube was sealed and heated at 70 °C for either 24 h. The reaction mixture was then cooled down to room temperature and filtered through a pad of celite. The filtrate was then evaporated and purified by flash chromatography on silica gel (petroleum ether/ethyl acetate 3:1) to give **2a** as a yellow powder, yield 84%. Mp 201–202 °C. <sup>1</sup>H NMR (400 MHz, CDCl<sub>3</sub>) δ 7.74 (d, *J* = 7.9 Hz, 2H), 7.64 (d, *J* = 7.6 Hz, 1H), 7.47 (t, *J* = 7.5 Hz, 1H), 7.28 (d, *J* = 8.0 Hz, 2H), 6.88 (t, *J* = 7.5 Hz, 1H), 6.79 (d, *J* = 7.7 Hz, 1H), 4.97 (s, 1H), 3.65 (t, *J* = 8.1 Hz, 1H), 3.33 (dd, *J* = 15.9, 7.9 Hz, 1H), 2.42 (s, 3H), 2.30 – 1.89 (m, 4H). <sup>13</sup>C NMR (100 MHz, CDCl<sub>3</sub>) δ 198.9, 158.4, 143.6, 137.7, 136.3, 129.4, 128.0, 124.9, 120.0, 119.8, 112.3, 83.2, 48.4, 39.9, 23.7, 21.6. HRMS (ESI) calcd for C<sub>18</sub>H<sub>19</sub>N<sub>2</sub>O<sub>3</sub>S (M+H)<sup>+</sup> 343.1116, found 343.1116.

**6-methoxy-1'-tosylspiro[indoline-2,2'-pyrrolidin]-3-one**

yellow powder, yield 83%. Mp 173–174 °C. <sup>1</sup>H NMR (400 MHz, CDCl<sub>3</sub>) δ 7.81 (d, *J* = 8.1 Hz, 2H), 7.53 (d, *J* = 8.6 Hz, 1H), 7.30 (d, *J* = 8.1 Hz, 2H), 6.39 (d, *J* = 8.6 Hz, 1H), 6.20 (s, 1H), 5.56 (s, 1H), 3.70 (s, 3H), 3.69 – 3.62 (m, 1H), 3.22 (dd, *J* = 16.2, 8.2 Hz, 1H), 2.42 (s, 3H),

2.30 – 2.08 (m, 3H), 2.00 – 1.91 (m, 1H). <sup>13</sup>C NMR (100 MHz, CDCl<sub>3</sub>) δ 196.3, 168.1, 161.0, 143.6, 136.2, 129.4, 128.1, 126.2, 113.0, 109.1, 95.1, 84.0, 55.6, 48.4, 39.9, 23.6, 21.6. HRMS (ESI) calcd for C<sub>19</sub>H<sub>21</sub>N<sub>2</sub>O<sub>4</sub>S (M+H)<sup>+</sup> 373.1222, found 373.1222.

**6-bromo-1'-tosylspiro[indoline-2,2'-pyrrolidin]-3-one**

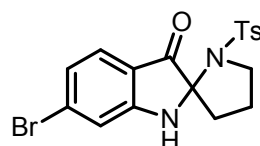

yellow powder, yield 74%. Mp 184–185 °C. <sup>1</sup>H NMR (400 MHz, DMSO-*d*<sub>6</sub>) δ 7.93 (s, 1H), 7.65 (d, *J* = 8.1 Hz, 2H), 7.42 (d, *J* = 8.1 Hz, 2H), 6.99 (s, 1H), 6.93 (d, *J* = 8.1 Hz, 1H), 5.76 (s, 1H), 3.42 – 3.36 (m, 1H), 3.32 – 3.25 (m, 1H), 2.41 (s, 3H), 2.08 – 1.96 (m, 3H), 1.90 – 1.80 (m, 1H). <sup>13</sup>C NMR (100 MHz, DMSO-*d*<sub>6</sub>) δ 198.3, 159.9, 143.7, 136.8, 132.2, 130.0, 127.9, 126.4, 121.5, 118.1, 114.6, 83.2, 48.6, 39.0, 23.7, 21.5. HRMS (ESI) calcd for C<sub>18</sub>H<sub>18</sub>BrN<sub>2</sub>O<sub>3</sub>S (M+H)<sup>+</sup> 421.0222, found 421.0213.

**6-methyl-1'-tosylspiro[indoline-2,2'-pyrrolidin]-3-one**

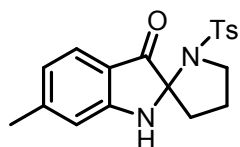

yellow powder, yield 84%. Mp 166–167 °C. <sup>1</sup>H NMR (400 MHz, DMSO-*d*<sub>6</sub>) δ 7.67 (d, *J* = 8.1 Hz, 2H), 7.52 (s, 1H), 7.41 (d, *J* = 8.1 Hz, 2H), 7.37 (d, *J* = 7.8 Hz, 1H), 6.63 (s, 1H), 6.61 (s, 1H), 3.41 – 3.36 (m, 1H), 3.30 (dd, *J* = 16.0 Hz, 8.0 Hz, 1H), 2.41 (s, 3H), 2.34 (s, 3H), 2.06 – 1.99 (m, 3H), 1.84 – 1.78 (m, 1H). <sup>13</sup>C NMR (100 MHz, DMSO-*d*<sub>6</sub>) δ 198.3, 160.0, 149.0, 143.5, 137.1, 129.8, 128.0, 124.5, 120.1, 116.9, 112.2, 83.3, 48.7, 39.2, 23.6, 22.5, 21.5. HRMS (ESI) calcd for C<sub>19</sub>H<sub>21</sub>N<sub>2</sub>O<sub>3</sub>S (M+H)<sup>+</sup> 357.1273, found 357.1273.

**6-chloro-1'-tosylspiro[indoline-2,2'-pyrrolidin]-3-one**

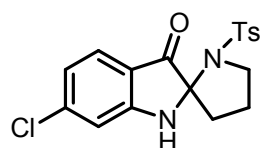

yellow powder, yield 81%. Mp 185–186 °C. <sup>1</sup>H NMR (400 MHz, DMSO-*d*<sub>6</sub>) δ 7.94 (s, 1H), 7.65 (d, *J* = 8.1 Hz, 2H), 7.50

(d,  $J = 8.2$  Hz, 1H), 7.42 (d,  $J = 8.1$  Hz, 2H), 6.83 (s, 1H), 6.80 (d,  $J = 8.2$  Hz, 1H), 3.41 – 3.35 (m, 1H), 3.32 – 3.25 (m, 1H), 2.41 (s, 3H), 2.08 – 1.96 (m, 3H), 1.90 – 1.82 (m, 1H).  $^{13}\text{C}$  NMR (100 MHz,  $\text{DMSO-}d_6$ )  $\delta$  197.7, 159.4, 143.2, 142.3, 136.4, 129.5, 127.4, 125.9, 118.2, 117.3, 111.1, 82.8, 48.1, 38.5, 23.2, 21.0. HRMS (ESI) calcd for  $\text{C}_{18}\text{H}_{18}\text{ClN}_2\text{O}_3\text{S}$  ( $\text{M}+\text{H}$ ) $^+$  377.0727, found 377.0722.

**methyl 3-oxo-1'-tosylspiro[indoline-2,2'-pyrrolidine]-6-carboxylate**

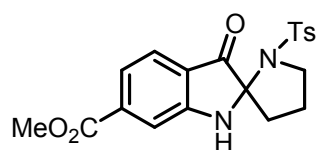

yellow powder, yield 46%. Mp 170–171 °C.  $^1\text{H}$  NMR (400 MHz,  $\text{CDCl}_3$ )  $\delta$  7.74 – 7.64 (m, 3H), 7.49 (d,  $J = 7.7$  Hz, 1H), 7.43 (s, 1H), 7.25 (d,  $J = 8.0$  Hz, 2H), 5.16 (s, 1H), 3.91 (s, 3H), 3.61 (t,  $J = 7.7$  Hz, 1H), 3.32 (dd,  $J = 15.8, 8.2$  Hz, 1H), 2.40 (s, 3H), 2.30 – 2.01 (m, 3H), 1.98 – 1.86 (m, 1H).  $^{13}\text{C}$  NMR (100 MHz,  $\text{CDCl}_3$ )  $\delta$  198.9, 166.4, 157.7, 143.8, 138.0, 136.2, 129.5, 127.9, 124.8, 122.9, 120.5, 113.4, 83.5, 52.6, 48.4, 39.9, 23.7, 21.5. HRMS (ESI) calcd for  $\text{C}_{20}\text{H}_{21}\text{N}_2\text{O}_5\text{S}$  ( $\text{M}+\text{H}$ ) $^+$  401.1171, found 401.1174.

**6-fluoro-1'-tosylspiro[indoline-2,2'-pyrrolidin]-3-one**

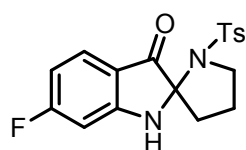

pale yellow powder, yield 70%. Mp 200–201 °C.  $^1\text{H}$  NMR (400 MHz,  $\text{CDCl}_3$ )  $\delta$  7.75 (d,  $J = 7.8$  Hz, 2H), 7.67 – 7.60 (m, 1H), 7.30 (d,  $J = 7.8$  Hz, 2H), 6.56 (t,  $J = 8.7$  Hz, 1H), 6.43 (d,  $J = 9.2$  Hz, 1H), 5.27 (s, 1H), 3.65 (t,  $J = 6.5$  Hz, 1H), 3.29 (dd,  $J = 15.8, 8.2$  Hz, 1H), 2.43 (s, 3H), 2.30 – 1.91 (m, 4H).  $^{13}\text{C}$  NMR (100 MHz,  $\text{CDCl}_3$ )  $\delta$  196.9, 170.9, 168.3, 159.9 ( $J = 14$  Hz), 143.8, 136.2, 129.5, 127.9, 116.4, 108.1 ( $J = 24$  Hz), 98.9 ( $J = 26$  Hz), 83.7, 48.41, 39.9, 23.6, 21.5. HRMS (ESI) calcd for  $\text{C}_{18}\text{H}_{18}\text{FN}_2\text{O}_3\text{S}$  ( $\text{M}+\text{H}$ ) $^+$  361.1022, found 361.1024.

### 5-methyl-1'-tosylspiro[indoline-2,2'-pyrrolidin]-3-one

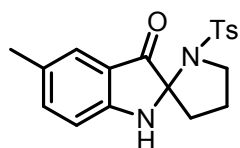

yellow powder, yield 64%. Mp 195–196 °C. <sup>1</sup>H NMR (400 MHz, CDCl<sub>3</sub>) δ 7.74 (d, *J* = 7.9 Hz, 2H), 7.45 (s, 1H), 7.34 – 7.25 (m, 3H), 6.74 (d, *J* = 8.2 Hz, 1H), 4.82 (s, 1H), 3.64 (t, *J* = 6.9 Hz, 1H), 3.32 (dd, *J* = 15.7, 8.6 Hz, 1H), 2.42 (s, 3H), 2.30 (s, 3H), 2.28 – 2.19 (m, 1H), 2.18 – 2.00 (m, 2H), 1.96 – 1.87 (m, 1H). <sup>13</sup>C NMR (100 MHz, CDCl<sub>3</sub>) δ 199.1, 156.7, 143.5, 139.0, 136.4, 129.4, 129.4, 128.0, 124.4, 120.3, 112.4, 83.7, 48.4, 40.0, 23.7, 21.6, 20.6. HRMS (ESI) calcd for C<sub>19</sub>H<sub>21</sub>N<sub>2</sub>O<sub>3</sub>S (M+H)<sup>+</sup> 357.1273, found 357.1273.

### 5-bromo-1'-tosylspiro[indoline-2,2'-pyrrolidin]-3-one

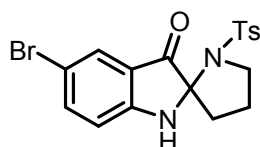

yellow powder, yield 67%. Mp 187–188 °C. <sup>1</sup>H NMR (400 MHz, CDCl<sub>3</sub>) δ 7.85 – 7.65 (m, 3H), 7.48 (d, *J* = 7.6 Hz, 1H), 7.30 (d, *J* = 8.1 Hz, 2H), 6.66 (d, *J* = 7.7 Hz, 1H), 5.31 (s, 1H), 3.65 (t, *J* = 8.0 Hz, 1H), 3.26 (dd, *J* = 16.0, 8.0 Hz, 1H), 2.43 (s, 3H), 2.29 – 1.87 (m, 4H). <sup>13</sup>C NMR (100 MHz, CDCl<sub>3</sub>) δ 197.8, 156.9, 143.8, 140.1, 136.1, 129.5, 127.9, 127.3, 121.3, 114.0, 111.8, 83.7, 48.3, 39.9, 23.7, 21.6. HRMS (ESI) calcd for C<sub>18</sub>H<sub>18</sub>BrN<sub>2</sub>O<sub>3</sub>S (M+H)<sup>+</sup> 421.0222, found 421.0218.

### 5-chloro-1'-tosylspiro[indoline-2,2'-pyrrolidin]-3-one

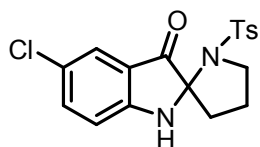

yellow powder, yield 71%. Mp 183–184 °C. <sup>1</sup>H NMR (400 MHz, CDCl<sub>3</sub>) δ 7.73 (d, *J* = 7.5 Hz, 2H), 7.59 (s, 1H), 7.38 (d, *J* = 8.4 Hz, 1H), 7.30 (d, *J* = 7.5 Hz, 2H), 6.73 (d, *J* = 8.5 Hz, 1H), 5.19 (s, 1H), 3.66 (t, *J* = 7.6 Hz, 1H), 3.28 (dd, *J* = 15.6, 7.7 Hz, 1H), 2.43 (s, 3H), 2.30 – 1.89 (m, 4H). <sup>13</sup>C NMR (100 MHz, CDCl<sub>3</sub>) δ 198.0, 156.6, 143.8, 137.5, 136.1, 129.5, 127.9, 124.9,

124.2, 120.8, 113.6, 83.8, 48.3, 39.9, 23.7, 21.6. HRMS (ESI) calcd for  $C_{18}H_{18}ClN_2O_3S$  (M+H)<sup>+</sup> 377.0727, found 377.0724.

**5-fluoro-1'-tosylspiro[indoline-2,2'-pyrrolidin]-3-one**

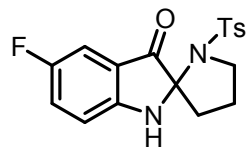

yellow powder, yield 58%. Mp 185–186 °C. <sup>1</sup>H NMR (400 MHz, CDCl<sub>3</sub>) δ 7.76 (d, *J* = 7.8 Hz, 2H), 7.37 – 7.21 (m, 4H), 6.80 (d, *J* = 6.0 Hz, 1H), 4.94 (s, 1H), 3.67 (t, *J* = 7.1 Hz, 1H), 3.32 (dd, *J* = 15.6, 8.1 Hz, 1H), 2.45 (s, 3H), 2.32 – 1.92 (m, 4H). <sup>13</sup>C NMR (100 MHz, CDCl<sub>3</sub>) δ 198.9, 157.0 (*J* = 239.0 Hz), 154.9, 143.8, 136.1, 129.5, 127.9, 125.4 (*J* = 25.1 Hz), 120.5 (*J* = 7.3 Hz), 113.7 (*J* = 7.3 Hz), 110.0 (*J* = 22.8 Hz), 84.3, 48.4, 40.1, 23.8, 21.6. HRMS (ESI) calcd for  $C_{18}H_{18}FN_2O_3S$  (M+H)<sup>+</sup> 361.1022, found 361.1020.

**4,5-dihydro-3H-spiro[furan-2,2'-indolin]-3'-one**

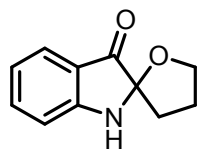

yellow oil. yield 63%. <sup>1</sup>H NMR (400 MHz, CDCl<sub>3</sub>) δ 7.58 (d, *J* = 7.6 Hz, 1H), 7.44 (t, *J* = 7.6 Hz, 1H), 6.83 (t, *J* = 7.4 Hz, 1H), 6.77 (d, *J* = 8.1 Hz, 1H), 4.92 (s, 1H), 4.19 – 4.06 (m, 2H), 2.36 – 2.23 (m, 2H), 2.17 – 1.95 (m, 2H). <sup>13</sup>C NMR (100 MHz, CDCl<sub>3</sub>) δ 201.1, 159.8, 137.9, 125.1, 119.7, 119.1, 112.2, 95.1, 69.3, 34.1, 25.8. HRMS (ESI) calcd for  $C_{11}H_{12}NO_2$  (M+H)<sup>+</sup> 190.0868, found 190.0863.

**6-(tert-butyl)-1'-tosylspiro[indoline-2,2'-pyrrolidin]-3-one**

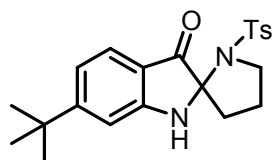

yellow powder, yield 48%. Mp 179–180 °C. <sup>1</sup>H NMR (400 MHz, CDCl<sub>3</sub>) δ 7.76 (d, *J* = 8.1 Hz, 2H), 7.57 (d, *J* = 8.2 Hz, 1H), 7.28 (d, *J* = 8.1 Hz, 2H), 6.95 (d, *J* = 8.2 Hz, 1H), 6.81 (s, 1H), 4.96 (s, 1H), 3.65 (td, *J* = 8.2, 2.8 Hz, 1H), 3.29 (dd, *J* = 15.7, 8.8 Hz,

1H), 2.42 (s, 3H), 2.30 – 2.20 (m, 1H), 2.18 – 2.01 (m, 2H), 1.98 – 1.86 (m, 1H), 1.32 (s, 9H). <sup>13</sup>C NMR (100 MHz, CDCl<sub>3</sub>) δ 198.2, 162.3, 158.9, 143.5, 136.3, 129.4, 128.0, 124.4, 118.2, 117.7, 109.1, 83.7, 48.4, 40.1, 35.7, 31.0, 23.7, 21.6. HRMS (ESI) calcd for C<sub>22</sub>H<sub>27</sub>N<sub>2</sub>O<sub>3</sub>S (M+H)<sup>+</sup> 399.1742, found 399.1742.

#### 4-chloro-1'-tosylspiro[indoline-2,2'-pyrrolidin]-3-one

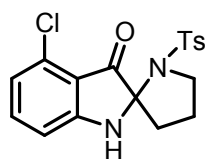

yellow powder, yield 45%. Mp 200–201 °C. <sup>1</sup>H NMR (400 MHz, CDCl<sub>3</sub>) δ 7.70 (d, *J* = 7.3 Hz, 2H), 7.31 (t, *J* = 8.3 Hz, 1H), 7.25 (d, *J* = 7.3 Hz, 2H), 6.76 (d, *J* = 7.5 Hz, 1H), 6.65 (d, *J* = 8.1 Hz, 1H), 5.17 (s, 1H), 3.66 (t, *J* = 8.0 Hz, 1H), 3.27 (dd, *J* = 15.7, 7.5 Hz, 1H), 2.40 (s, 3H), 2.29 – 1.89 (m, 4H). <sup>13</sup>C NMR (100 MHz, CDCl<sub>3</sub>) δ 196.0, 159.6, 143.8, 137.8, 135.9, 132.6, 129.5, 128.0, 120.6, 116.6, 110.5, 83.4, 48.4, 39.9, 23.5, 21.6. HRMS (ESI) calcd for C<sub>18</sub>H<sub>18</sub>ClN<sub>2</sub>O<sub>3</sub>S (M+H)<sup>+</sup> 377.0727, found 377.0725.

#### 7-chloro-1'-tosylspiro[indoline-2,2'-pyrrolidin]-3-one

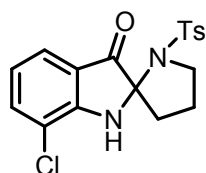

yellow powder, yield 27%. Mp 178–179 °C. <sup>1</sup>H NMR (400 MHz, CDCl<sub>3</sub>) δ 7.69 (d, *J* = 7.5 Hz, 2H), 7.54 (d, *J* = 7.2 Hz, 1H), 7.46 (d, *J* = 7.4 Hz, 1H), 7.25 (d, *J* = 7.3 Hz, 2H), 6.80 (t, *J* = 7.5 Hz, 1H), 5.06 (s, 1H), 3.56 (t, *J* = 7.8 Hz, 1H), 3.41 (dd, *J* = 15.2, 7.6 Hz, 1H), 2.38 (s, 3H), 2.30 – 1.87 (m, 4H). <sup>13</sup>C NMR (100 MHz, CDCl<sub>3</sub>) δ 198.3, 154.5, 143.7, 136.4, 136.3, 129.5, 127.9, 123.4, 121.4, 120.2, 117.3, 83.2, 48.5, 39.8, 23.7, 21.6. HRMS (ESI) calcd for C<sub>18</sub>H<sub>18</sub>ClN<sub>2</sub>O<sub>3</sub>S (M+H)<sup>+</sup> 377.0727, found 377.0727.

#### 7-methyl-1'-tosylspiro[indoline-2,2'-pyrrolidin]-3-one

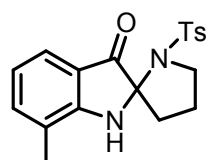

yellow powder, yield 38%. Mp 178–179 °C. <sup>1</sup>H NMR (400

MHz, CDCl<sub>3</sub>)  $\delta$  7.72 (d,  $J$  = 7.6 Hz, 2H), 7.50 (d,  $J$  = 7.5 Hz, 1H), 7.31 (d,  $J$  = 7.1 Hz, 1H), 7.27 (d,  $J$  = 7.6 Hz, 2H), 6.82 (t,  $J$  = 7.2 Hz, 1H), 4.74 (s, 1H), 3.65 (t,  $J$  = 7.6 Hz, 1H), 3.40 (dd,  $J$  = 15.7, 7.9 Hz, 1H), 2.42 (s, 3H), 2.34 – 1.88 (m, 7H). <sup>13</sup>C NMR (100 MHz, CDCl<sub>3</sub>)  $\delta$  199.3, 157.6, 143.5, 137.8, 136.5, 129.4, 128.0, 122.3, 121.3, 119.9, 119.6, 83.3, 48.6, 40.1, 23.6, 21.6, 15.8. HRMS (ESI) calcd for C<sub>19</sub>H<sub>21</sub>N<sub>2</sub>O<sub>3</sub>S (M+H)<sup>+</sup> 357.1273, found 357.1275.

**5,6-dimethyl-1'-tosylspiro[indoline-2,2'-pyrrolidin]-3-one**

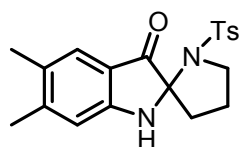

yellow powder, yield 48%. Mp 171–172 °C. <sup>1</sup>H NMR (400 MHz, CDCl<sub>3</sub>)  $\delta$  7.72 (d,  $J$  = 7.8 Hz, 2H), 7.38 (s, 1H), 7.25 (d,  $J$  = 7.8 Hz, 2H), 6.60 (s, 1H), 4.81 (s, 1H), 3.60 (t,  $J$  = 7.7 Hz, 1H), 3.28 (dd,  $J$  = 15.5, 7.6 Hz, 1H), 2.39 (s, 3H), 2.24 (s, 3H), 2.18 (s, 3H), 2.14 – 1.80 (m, 4H). <sup>13</sup>C NMR (100 MHz, CDCl<sub>3</sub>)  $\delta$  198.4, 157.5, 148.6, 143.5, 136.4, 129.4, 128.8, 128.0, 124.7, 118.2, 113.4, 83.7, 48.4, 40.0, 23.7, 21.6, 21.3, 19.3. HRMS (ESI) calcd for C<sub>20</sub>H<sub>23</sub>N<sub>2</sub>O<sub>3</sub>S (M+H)<sup>+</sup> 371.1429, found 371.1427.

**5,6-dichloro-1'-tosylspiro[indoline-2,2'-pyrrolidin]-3-one**

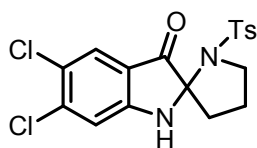

yellow powder, yield 53%. Mp 188–189 °C. <sup>1</sup>H NMR (400 MHz, CDCl<sub>3</sub>)  $\delta$  7.76 – 7.68 (m, 3H), 7.31 (d,  $J$  = 8.0 Hz, 2H), 6.93 (s, 1H), 5.20 (s, 1H), 3.64 (t,  $J$  = 7.7 Hz, 1H), 3.27 (dd,  $J$  = 16.0, 7.9 Hz, 1H), 2.44 (s, 3H), 2.30 – 1.90 (m, 4H). <sup>13</sup>C NMR (100 MHz, CDCl<sub>3</sub>)  $\delta$  197.0, 156.2, 144.0, 141.9, 135.9, 129.6, 127.9, 125.9, 123.7, 119.4, 113.8, 83.8, 48.3, 39.9, 23.7, 21.6. HRMS (ESI) calcd for C<sub>18</sub>H<sub>17</sub>Cl<sub>2</sub>N<sub>2</sub>O<sub>3</sub>S (M+H)<sup>+</sup> 411.0337, found 411.0324.

**1'-tosyl-6-(trifluoromethyl)spiro[indoline-2,2'-pyrrolidin]-3-one**



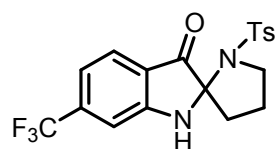

yellow powder, yield 60%. Mp 185–186 °C. <sup>1</sup>H NMR (400 MHz, CDCl<sub>3</sub>) δ 7.81 – 7.71 (m, *J* = 8.0 Hz, 3H), 7.34 (d, *J* = 8.0 Hz, 2H), 7.12 (d, *J* = 7.8 Hz, 1H), 7.05 (s, 1H), 5.34 (s, 1H), 3.68 (t, *J* = 8.0 Hz, 1H), 3.33 (dd, *J* = 15.7, 8.4 Hz, 1H), 2.46 (s, 3H), 2.34 – 1.94 (m, 4H). <sup>13</sup>C NMR (100 MHz, CDCl<sub>3</sub>) δ 198.5, 157.5, 144.0, 138.5 (*J* = 32.3 Hz), 136.0, 129.6, 127.9, 125.5, 123.5 (*J* = 272.0 Hz), 122.0, 116.1, 109.2, 83.6, 48.3, 39.9, 23.8, 21.6. HRMS (ESI) calcd for C<sub>19</sub>H<sub>18</sub>F<sub>3</sub>N<sub>2</sub>O<sub>3</sub>S (M+H)<sup>+</sup> 411.0990, found 411.0985.

### 1'-tosylspiro[indoline-2,2'-piperidin]-3-one

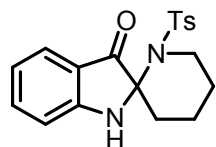

yellow powder, yield 59%. Mp 135–136 °C. <sup>1</sup>H NMR (400 MHz, CDCl<sub>3</sub>) δ 7.80 (d, *J* = 7.2 Hz, 2H), 7.74 (d, *J* = 7.6 Hz, 1H), 7.46 (t, *J* = 6.6 Hz, 1H), 7.29 (d, *J* = 7.2 Hz, 2H), 6.92 (t, *J* = 7.0 Hz, 1H), 6.84 (d, *J* = 7.8 Hz, 1H), 5.39 (s, 1H), 3.45 (d, *J* = 11.5 Hz, 1H), 3.18 (t, *J* = 10.8 Hz, 1H), 2.44 (s, 3H), 2.01 – 1.50 (m, 6H). <sup>13</sup>C NMR (100 MHz, CDCl<sub>3</sub>) δ 198.1, 157.1, 143.7, 137.0, 135.8, 129.3, 128.4, 125.2, 120.3, 119.8, 112.8, 76.7, 44.5, 36.1, 24.3, 21.6, 19.9. HRMS (ESI) calcd for C<sub>19</sub>H<sub>21</sub>N<sub>2</sub>O<sub>3</sub>S (M+H)<sup>+</sup> 357.1273, found 357.1267.

### 6-methyl-1'-tosylspiro[indoline-2,2'-piperidin]-3-one

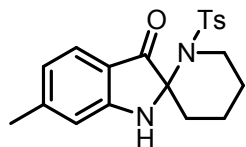

yellow powder, yield 59%. Mp 186–187 °C. <sup>1</sup>H NMR (400 MHz, CD<sub>3</sub>OD-CDCl<sub>3</sub>) δ 7.73 (d, *J* = 8.0 Hz, 2H), 7.56 (d, *J* = 7.9 Hz, 1H), 7.29 (d, *J* = 7.9 Hz, 2H), 6.69 (d, *J* = 7.9 Hz, 1H), 6.63 (s, 1H), 3.42 (d, *J* = 11.6 Hz, 1H), 3.04 (t, *J* = 10.7 Hz, 1H), 2.43 (s, 3H), 2.36 (s, 3H), 1.94 – 1.78 (m, 3H), 1.67 – 1.50 (m, 3H). <sup>13</sup>C NMR (100 MHz, CD<sub>3</sub>OD-CDCl<sub>3</sub>) δ 198.8, 158.4, 149.1, 143.9, 135.4, 129.2, 128.4, 124.7, 121.0, 117.2, 112.5, 77.0, 44.6, 36.2, 24.3, 22.3,

21.3, 19.6. HRMS (ESI) calcd for C<sub>20</sub>H<sub>23</sub>N<sub>2</sub>O<sub>3</sub>S (M+H)<sup>+</sup> 371.1429, found 371.1432.

**6-bromo-1'-tosylspiro[indoline-2,2'-piperidin]-3-one**

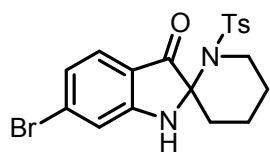

yellow powder, yield 63%. Mp 200–201 °C. <sup>1</sup>H NMR (400 MHz, DMSO-*d*<sub>6</sub>) δ 7.59 (d, *J* = 8.1 Hz, 2H), 7.47 (d, *J* = 8.1 Hz, 1H), 7.40 (d, *J* = 8.1 Hz, 2H), 6.99 – 6.92 (m, 2H), 3.34 – 3.29 (m, 1H), 2.84 (t, *J* = 11.4 Hz, 1H), 2.40 (s, 3H), 1.80 – 1.37 (m, 6H). <sup>13</sup>C NMR (100 MHz, DMSO-*d*<sub>6</sub>) δ 196.3, 158.2, 143.6, 135.2, 130.9, 129.3, 128.0, 126.2, 121.0, 117.9, 114.2, 76.4, 44.4, 35.8, 23.9, 21.0, 18.8. HRMS (ESI) calcd for C<sub>19</sub>H<sub>20</sub>BrN<sub>2</sub>O<sub>3</sub>S (M+H)<sup>+</sup> 435.0378, found 435.0365.

**1'-(phenylsulfonyl)spiro[indoline-2,2'-pyrrolidin]-3-one**

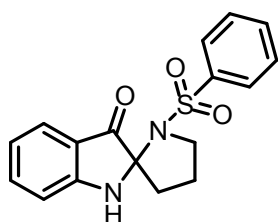

yellow powder, yield 73%. Mp 189–190 °C. <sup>1</sup>H NMR (400 MHz, CDCl<sub>3</sub>) δ 7.89 (d, *J* = 7.5 Hz, 2H), 7.66 (d, *J* = 7.6 Hz, 1H), 7.58 (d, *J* = 7.3 Hz, 1H), 7.54 – 7.44 (m, 3H), 6.89 (t, *J* = 7.4 Hz, 1H), 6.80 (d, *J* = 8.2 Hz, 1H), 5.12 (s, 1H), 3.67 (td, *J* = 8.3, 3.1 Hz, 1H), 3.36 (dd, *J* = 15.7, 8.7 Hz, 1H), 2.33 – 2.23 (m, 1H), 2.22 – 2.04 (m, 2H), 1.96 (ddd, *J* = 11.9, 6.1, 3.3 Hz, 1H). <sup>13</sup>C NMR (100 MHz, CDCl<sub>3</sub>) δ 198.9, 158.4, 139.3, 137.7, 132.8, 128.8, 127.9, 124.9, 119.9, 119.8, 112.3, 83.3, 48.5, 39.8, 23.7. HRMS (ESI) calcd for C<sub>17</sub>H<sub>17</sub>N<sub>2</sub>O<sub>3</sub>S (M+H)<sup>+</sup> 329.0960, found 329.0954.

**1'-((4-chlorophenyl)sulfonyl)spiro[indoline-2,2'-pyrrolidin]-3-one**

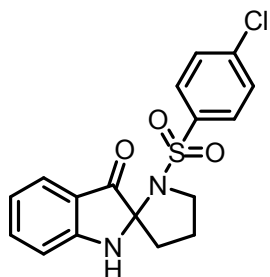

yellow powder, yield 78%. Mp 182–183 °C. <sup>1</sup>H NMR (400 MHz, CDCl<sub>3</sub>-CD<sub>3</sub>OD) δ 7.81 (d, *J* = 7.9 Hz, 2H), 7.62 (d, *J* = 7.5 Hz, 1H), 7.54 – 7.45 (m, 3H), 6.86 (t, *J* = 7.5 Hz, 1H), 6.82

(d,  $J = 8.1$  Hz, 1H), 3.56 (t,  $J = 7.2$  Hz, 1H), 3.42 (dd,  $J = 15.4, 7.9$  Hz, 1H), 2.30 – 2.05 (m, 3H), 2.00 – 1.89 (m, 1H).  $^{13}\text{C}$  NMR (100 MHz,  $\text{CDCl}_3\text{-CD}_3\text{OD}$ )  $\delta$  199.9, 159.1, 139.3, 138.0, 137.8, 129.3, 129.0, 124.8, 119.3, 119.2, 112.1, 83.2, 48.5, 39.3, 23.5. HRMS (ESI) calcd for  $\text{C}_{17}\text{H}_{15}\text{ClN}_2\text{O}_3\text{S}$  ( $\text{M}+\text{H}$ ) $^+$  363.0570, found 363.0561.

**1'-((4-(tert-butyl)phenyl)sulfonyl)spiro[indoline-2,2'-pyrrolidin]-3-one**

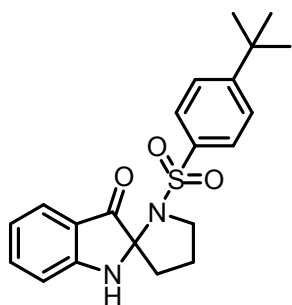

yellow powder, yield 83%. Mp 175–176 °C.  $^1\text{H}$  NMR (400 MHz,  $\text{CDCl}_3$ )  $\delta$  7.79 (d,  $J = 8.5$  Hz, 2H), 7.64 (d,  $J = 7.6$  Hz, 1H), 7.49 (d,  $J = 8.4$  Hz, 2H), 7.46 (d,  $J = 7.6$  Hz, 1H), 6.87 (t,  $J = 7.4$  Hz, 1H), 6.80 (d,  $J = 8.1$  Hz, 1H), 5.05 (s, 1H), 3.65 (td,  $J = 8.3, 3.0$  Hz, 1H), 3.34 (dd,  $J = 15.8, 8.7$  Hz, 1H), 2.32 – 2.03 (m, 3H), 1.94 (ddd,  $J = 11.9, 6.0, 3.1$  Hz, 1H), 1.34 (s, 9H).  $^{13}\text{C}$  NMR (100 MHz,  $\text{CDCl}_3\text{-CD}_3\text{OD}$ )  $\delta$  200.3, 159.2, 156.6, 138.0, 136.1, 127.7, 126.0, 125.8, 124.8, 119.1, 112.1, 83.2, 48.3, 39.3, 35.0, 30.9, 23.6. HRMS (ESI) calcd for  $\text{C}_{21}\text{H}_{25}\text{N}_2\text{O}_3\text{S}$  ( $\text{M}+\text{H}$ ) $^+$  385.1586, found 385.1588.

**1'-((4-methoxyphenyl)sulfonyl)spiro[indoline-2,2'-pyrrolidin]-3-one**

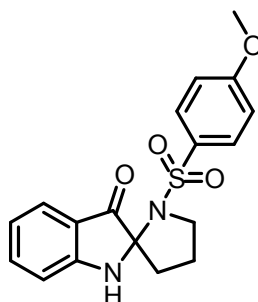

yellow powder, yield 68%. Mp 167–168 °C.  $^1\text{H}$  NMR (400 MHz,  $\text{CDCl}_3$ )  $\delta$  7.8 (d,  $J = 8.9$  Hz, 2H), 7.64 (d,  $J = 7.7$  Hz, 1H), 7.50 – 7.43 (m, 1H), 6.95 (d,  $J = 8.9$  Hz, 2H), 6.87 (t,  $J = 7.4$  Hz, 1H), 6.79 (d,  $J = 8.2$  Hz, 1H), 5.08 (s, 1H), 3.87 (s, 3H), 3.63 (td,  $J = 8.3, 3.2$  Hz, 1H), 3.30 (td,  $J = 8.8, 7.0$  Hz, 1H), 2.31 – 2.21 (m, 1H), 2.19 – 2.02 (m, 2H), 1.94 (ddd,  $J = 12.1, 6.2, 3.3$  Hz, 1H).  $^{13}\text{C}$  NMR (100 MHz,  $\text{CDCl}_3\text{-CD}_3\text{OD}$ )  $\delta$  200.3, 163.1, 159.1, 137.9, 130.7, 130.0, 124.7, 119.2, 119.1, 113.9,

112.1, 83.2, 55.5, 48.3, 39.4, 23.5. HRMS (ESI) calcd for  $C_{18}H_{19}N_2O_4S$  (M+H)<sup>+</sup> 359.1066, found 359.1064.

**1'-((4-bromophenyl)sulfonyl)spiro[indoline-2,2'-pyrrolidin]-3-one**

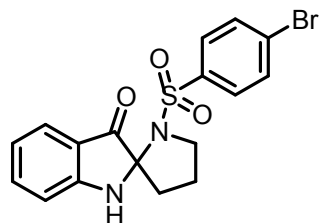

yellow powder, yield 82%. Mp 172–173 °C. <sup>1</sup>H NMR (400 MHz, CDCl<sub>3</sub>) δ 7.73 (d, *J* = 8.5 Hz, 2H), 7.67 – 7.61 (m, 3H), 7.50 (t, *J* = 7.7 Hz, 1H), 6.91 (t, *J* = 7.5 Hz, 1H), 6.81 (d, *J* = 8.2 Hz, 1H), 4.91 (s, 1H), 3.65 (td, *J* = 8.4, 3.0 Hz, 1H), 3.34 (dd, *J* = 15.7, 8.6 Hz, 1H), 2.32 – 1.91 (m, 4H). <sup>13</sup>C NMR (100 MHz, CDCl<sub>3</sub>-CD<sub>3</sub>OD) δ 200.0, 159.2, 138.3, 138.1, 132.0, 129.4, 127.8, 124.8, 119.3, 119.1, 112.1, 83.2, 48.5, 39.2, 23.5. HRMS (ESI) calcd for  $C_{17}H_{16}BrN_2O_3S$  (M+H)<sup>+</sup> 407.0065, found 407.0066.

**1'-(thiophen-2-ylsulfonyl)spiro[indoline-2,2'-pyrrolidin]-3-one**

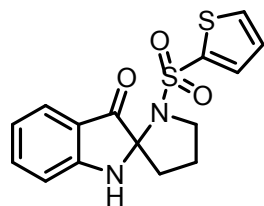

yellow powder, yield 79%. Mp 184–185 °C. <sup>1</sup>H NMR (400 MHz, CDCl<sub>3</sub>) δ 7.65 (d, *J* = 7.7 Hz, 1H), 7.62 (d, *J* = 3.0 Hz, 1H), 7.58 (d, *J* = 4.8 Hz, 1H), 7.48 (t, *J* = 7.6 Hz, 1H), 7.10 – 7.06 (m, 1H), 6.89 (t, *J* = 7.4 Hz, 1H), 6.81 (d, *J* = 8.1 Hz, 1H), 4.88 (s, 1H), 3.69 (td, *J* = 8.5, 2.9 Hz, 1H), 3.53 (dd, *J* = 15.8, 8.7 Hz, 1H), 2.37 – 1.93 (m, 4H). <sup>13</sup>C NMR (100 MHz, DMSO-*d*<sub>6</sub>) δ 198.5, 159.4, 139.8, 137.5, 133.5, 133.0, 127.4, 124.2, 118.7, 118.2, 112.0, 82.6, 48.5, 38.4, 23.1. HRMS (ESI) calcd for  $C_{15}H_{15}N_2O_3S_2$  (M+H)<sup>+</sup> 335.0524, found 335.0511.

**1'-(cyclopropylsulfonyl)spiro[indoline-2,2'-pyrrolidin]-3-one**

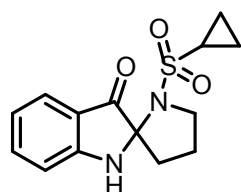

yellow powder, yield 81%. Mp 192–193 °C. <sup>1</sup>H NMR (400 MHz, CDCl<sub>3</sub>) δ 7.63 (d, *J* = 7.7 Hz, 1H), 7.47 (t, *J* = 7.4 Hz, 1H),

6.88 (t,  $J = 7.4$  Hz, 1H), 6.81 (d,  $J = 8.2$  Hz, 1H), 5.10 (s, 1H), 3.76 (td,  $J = 8.1, 1.9$  Hz, 1H), 3.62 (dd,  $J = 15.5, 7.7$  Hz, 1H), 2.69 – 2.60 (m, 1H), 2.39 – 2.29 (m, 1H), 2.27 – 2.01 (m, 3H), 1.23 – 1.16 (m, 1H), 1.14 – 1.02 (m, 2H), 0.96 – 0.87 (m, 1H).  $^{13}\text{C}$  NMR (100 MHz, DMSO- $d_6$ )  $\delta$  199.5, 159.6, 137.9, 124.6, 119.0, 118.4, 112.4, 82.8, 49.2, 39.4, 29.7, 23.8, 5.0, 4.8. HRMS (ESI) calcd for  $\text{C}_{14}\text{H}_{17}\text{N}_2\text{O}_3\text{S}$  (M+H) $^+$  293.0960, found 293.0960.

### 1'-(methylsulfonyl)spiro[indoline-2,2'-pyrrolidin]-3-one

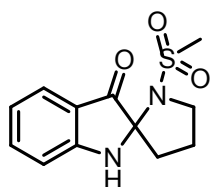

yellow powder, yield 87%. Mp 191–192 °C.  $^1\text{H}$  NMR (400 MHz, DMSO- $d_6$ )  $\delta$  7.70 (s, 1H), 7.47 (t,  $J = 7.7$  Hz, 1H), 7.43 (d,  $J = 7.6$  Hz, 1H), 6.83 (d,  $J = 8.2$  Hz, 1H), 6.76 (t,  $J = 7.4$  Hz, 1H), 3.64 – 3.56 (m, 1H), 3.43 (dd,  $J = 15.5, 8.9$  Hz, 1H), 2.99 (s, 3H), 2.18 – 2.01 (m, 3H), 1.94 – 1.86 (m, 1H).  $^{13}\text{C}$  NMR (100 MHz, DMSO- $d_6$ )  $\delta$  198.8, 159.3, 137.4, 124.1, 118.6, 118.0, 112.1, 82.2, 48.5, 39.0, 38.9, 23.1. HRMS (ESI) calcd for  $\text{C}_{14}\text{H}_{15}\text{N}_2\text{O}_3\text{S}$  (M+H) $^+$  267.0803, found 267.0795.

### 1'-benzoylspiro[indoline-2,2'-pyrrolidin]-3-one

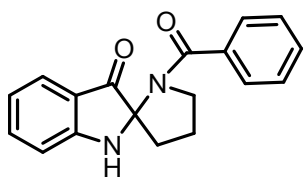

yellow oil, yield 37%.  $^1\text{H}$  NMR (400 MHz,  $\text{CDCl}_3$ )  $\delta$  7.67 (d,  $J = 7.5$  Hz, 1H), 7.55 (d,  $J = 7.0$  Hz, 2H), 7.47 – 7.33 (m, 4H), 6.87 (t,  $J = 7.3$  Hz, 1H), 6.81 (d,  $J = 8.0$  Hz, 1H), 4.88 (s, 1H), 3.71 (t,  $J = 5.8$  Hz, 2H), 2.34 – 2.18 (m, 2H), 2.04 – 1.92 (m, 2H).  $^{13}\text{C}$  NMR (100 MHz,  $\text{CDCl}_3$ )  $\delta$  199.3, 168.8, 158.2, 136.9, 135.6, 130.4, 128.2, 127.4, 124.6, 120.9, 119.7, 112.4, 82.0, 50.7, 37.3, 24.2. HRMS (ESI) calcd for  $\text{C}_{18}\text{H}_{17}\text{N}_2\text{O}_2$  (M+H) $^+$  293.1290, found 293.1285.



## Reference

- (1) Kim, S.; Chung, Y. K. *Organic Letters*, **2014**, *16*, 4352.
- (2) Schomaker, J. M.; Geiser, A. R.; Huang, R.; Borhan, B. *J. Am. Chem. Soc.*, **2007**, *129*, 3794.
- (3) Huang, Y.; Yang, Y.; Song, H.; Liu Y.; Wang, Q. *Scientific Reports*, **2015**, *5*, 13516.
- (4) Jana, N.; Zhou, F.; Driver, T. G. *J. Am. Chem. Soc.* **2015**, *137*, 6738.
- (5) Zhou, F.; Wang, D. S.; Driver, T. G. *Adv.Synth. Catal.* **2015**, *357*, 3463.

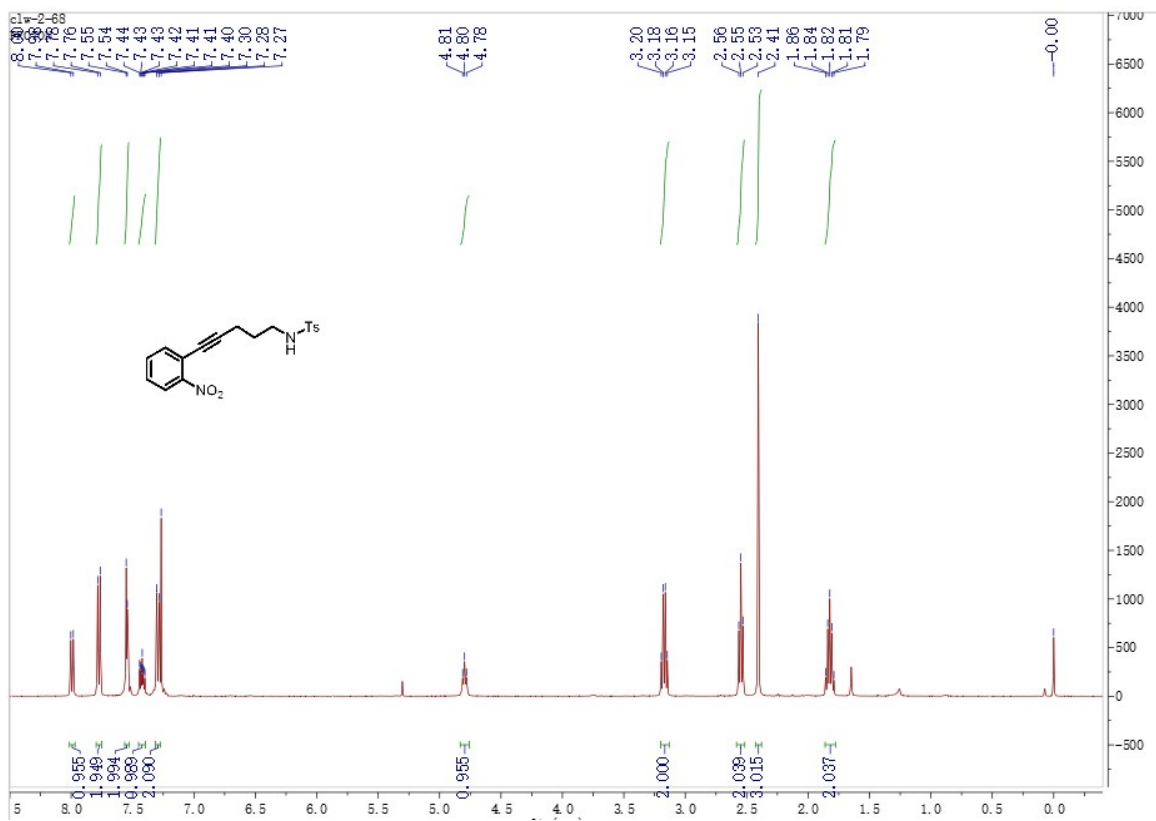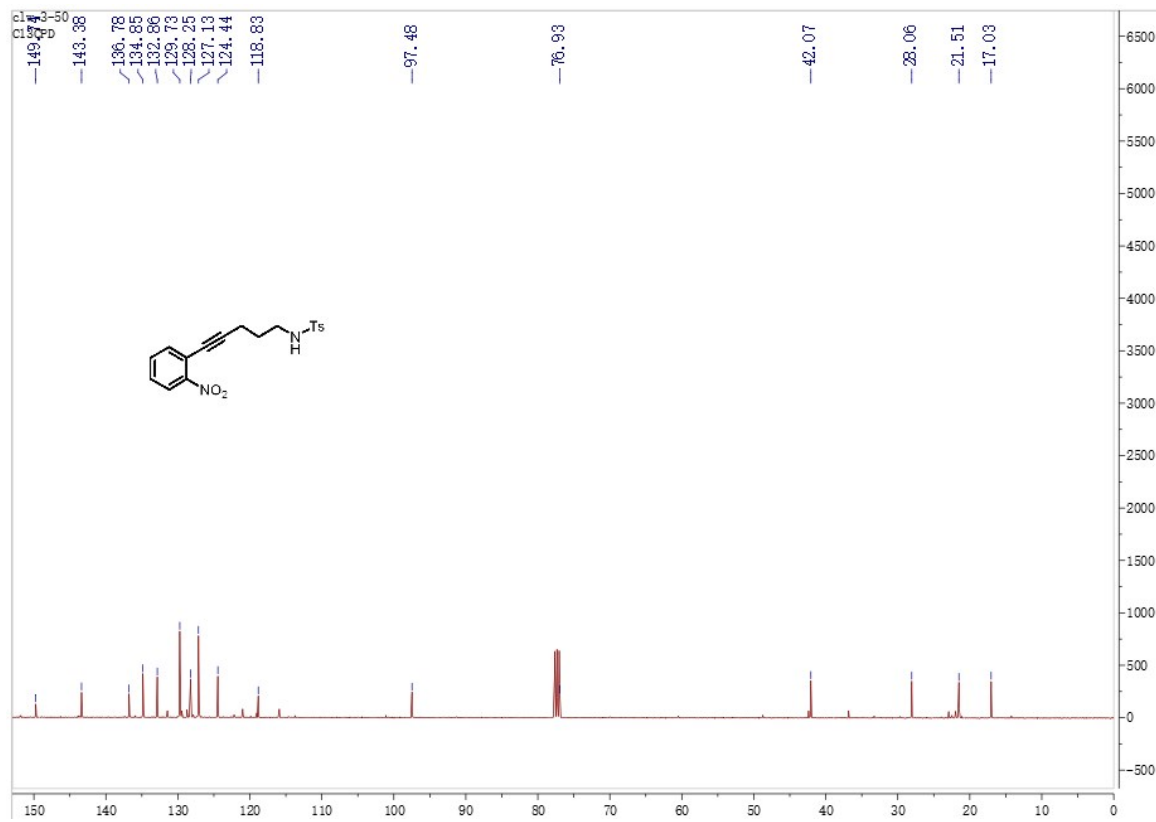



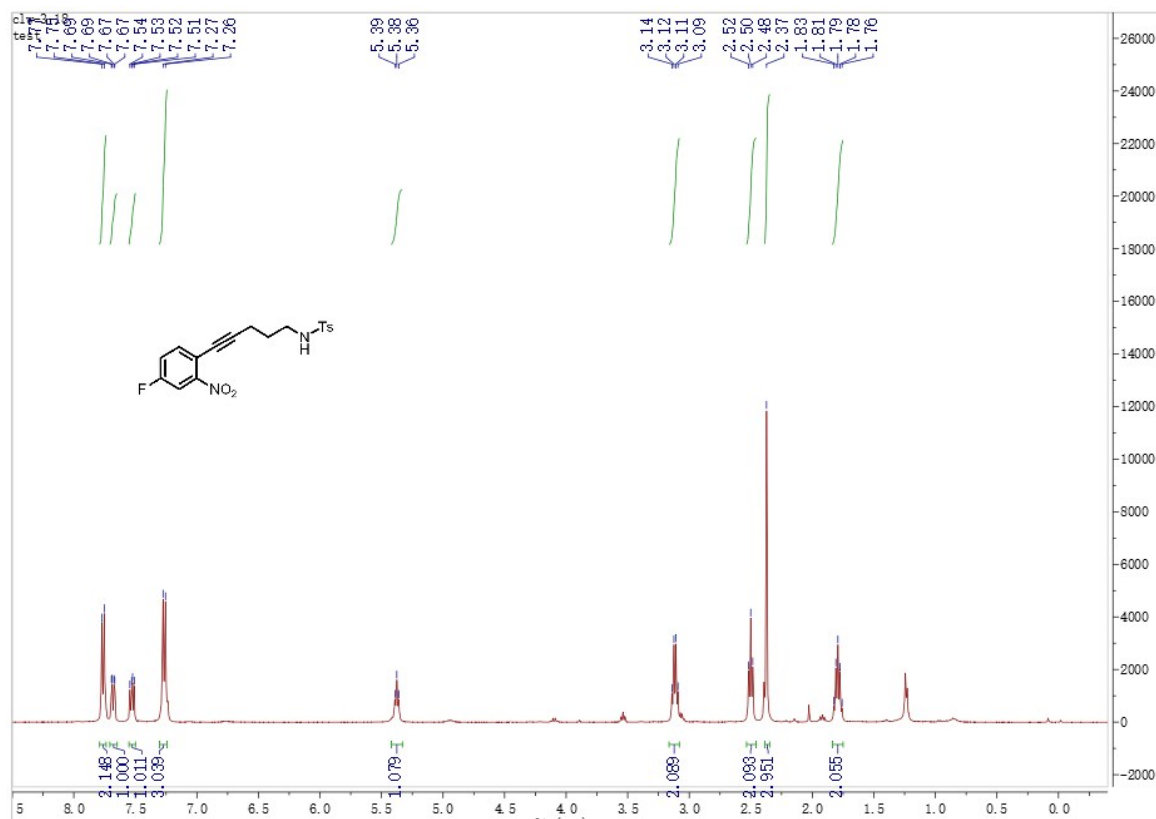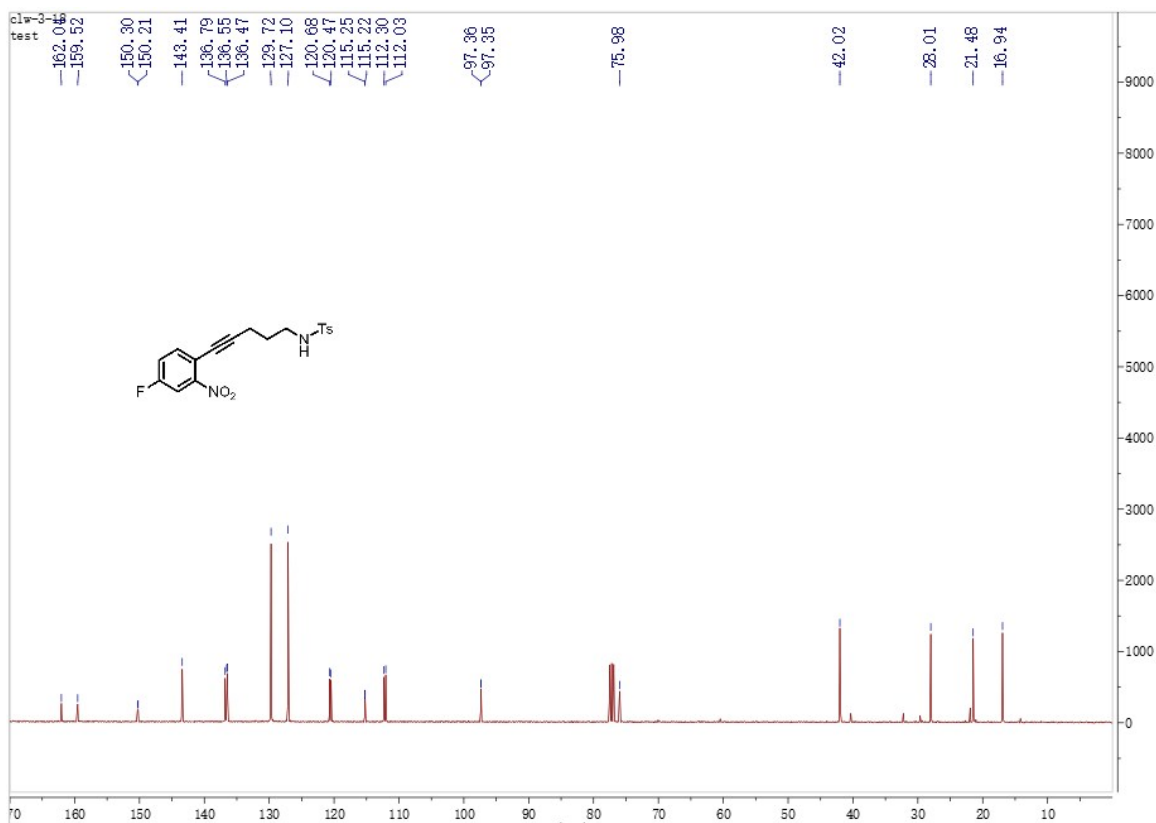

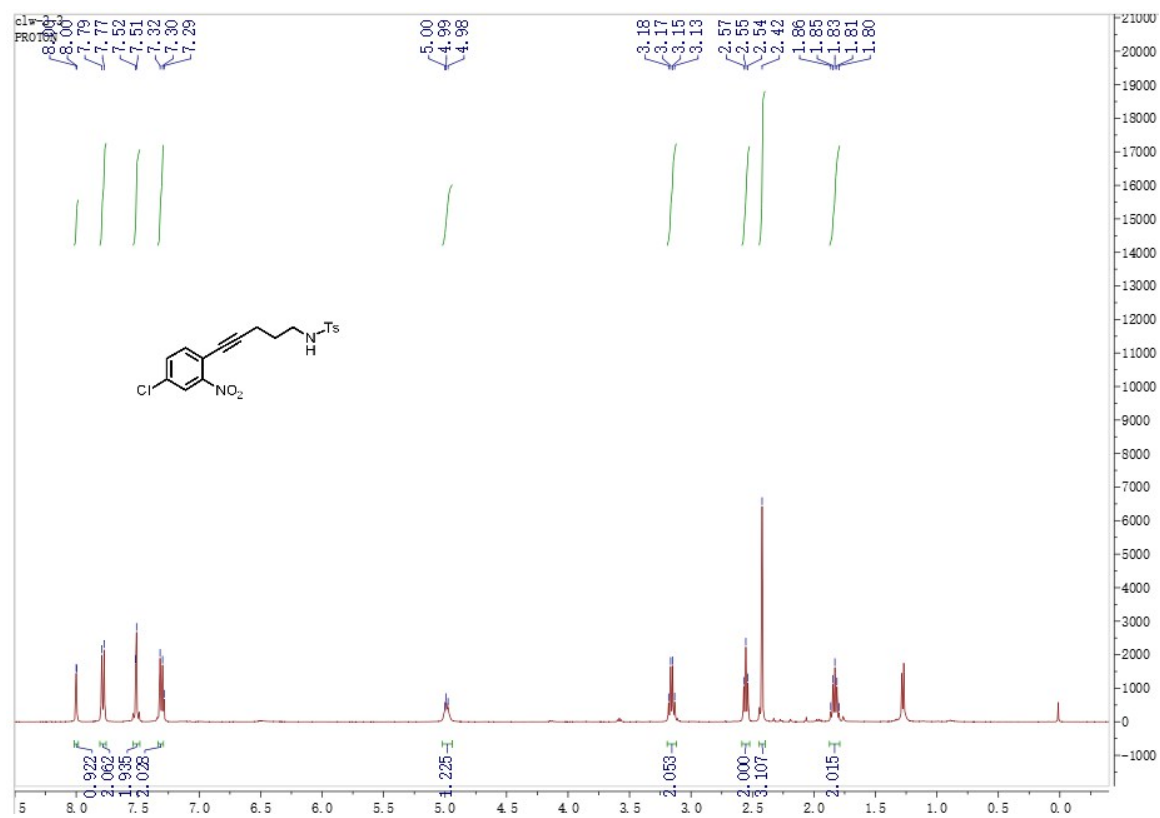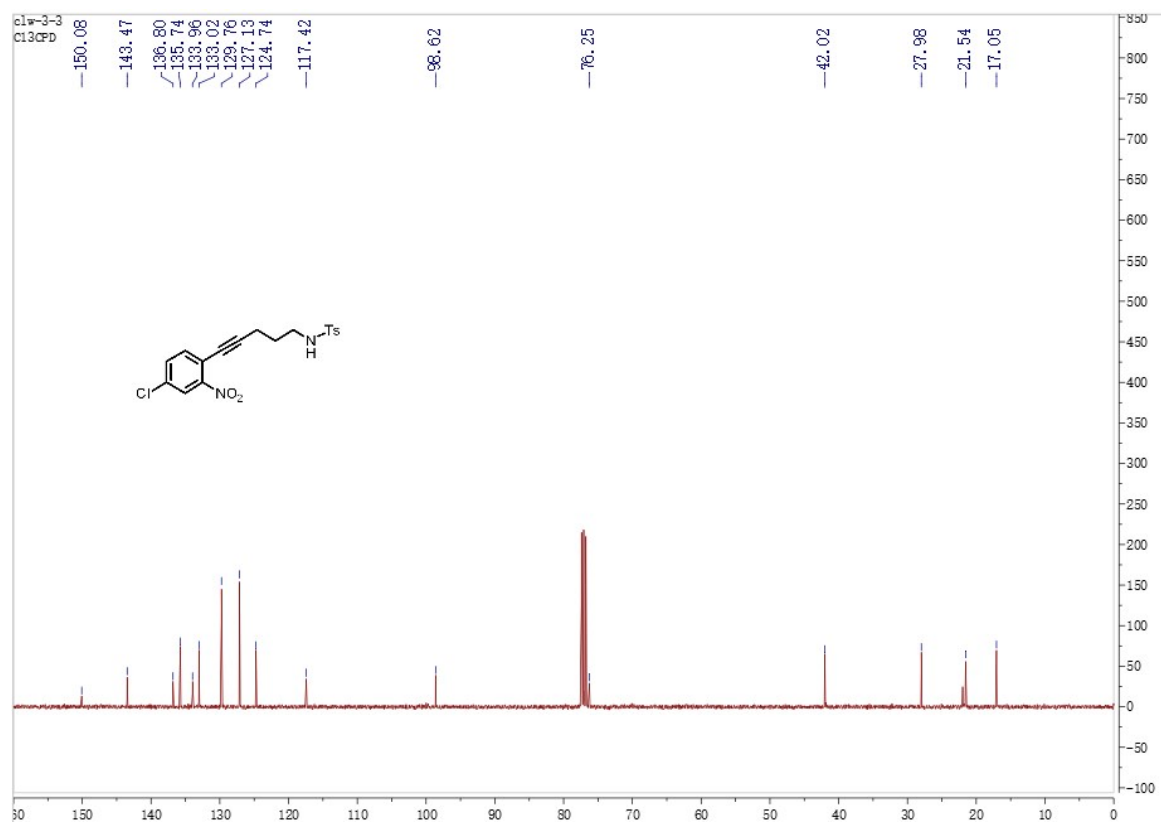

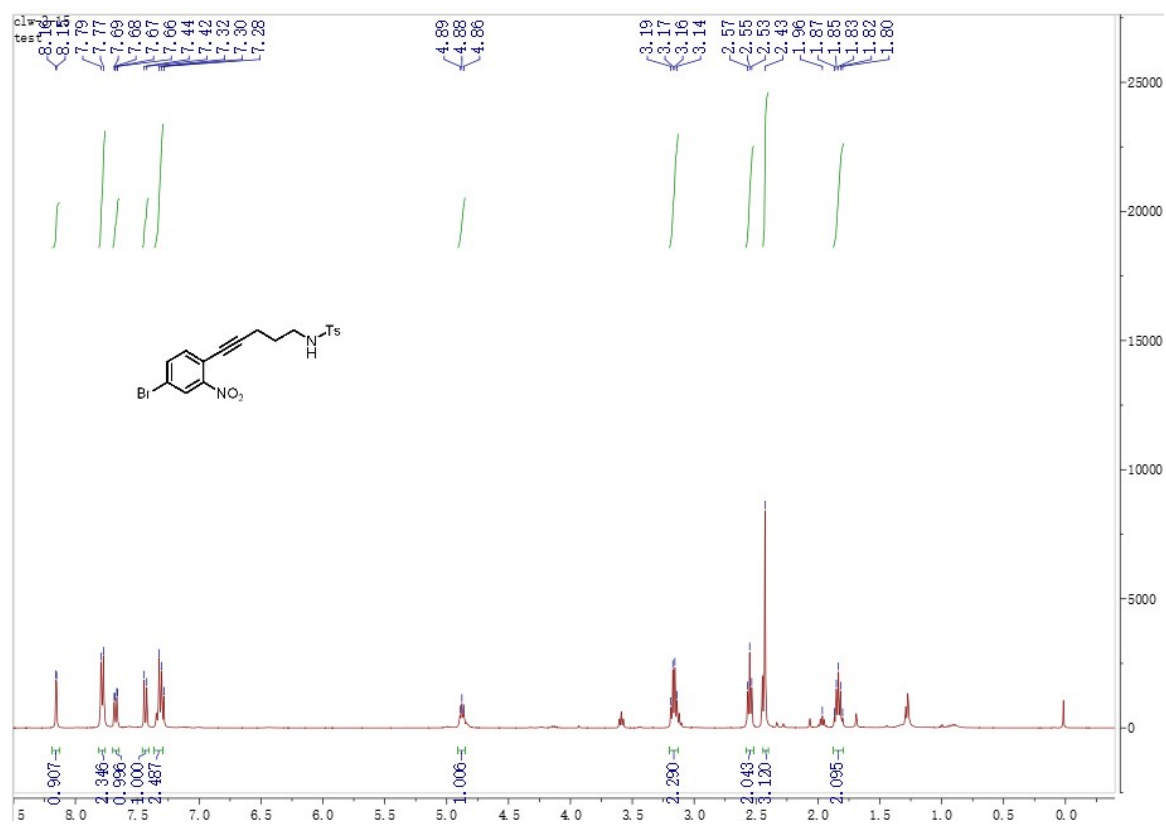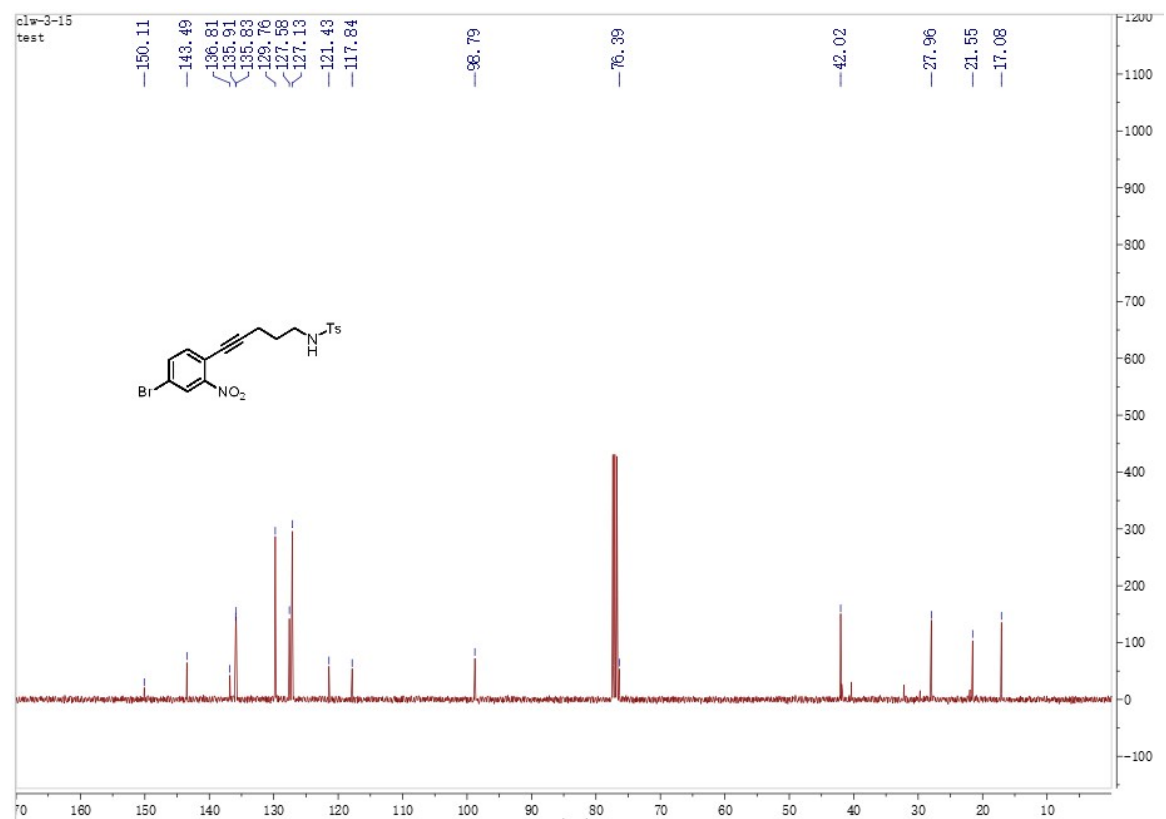

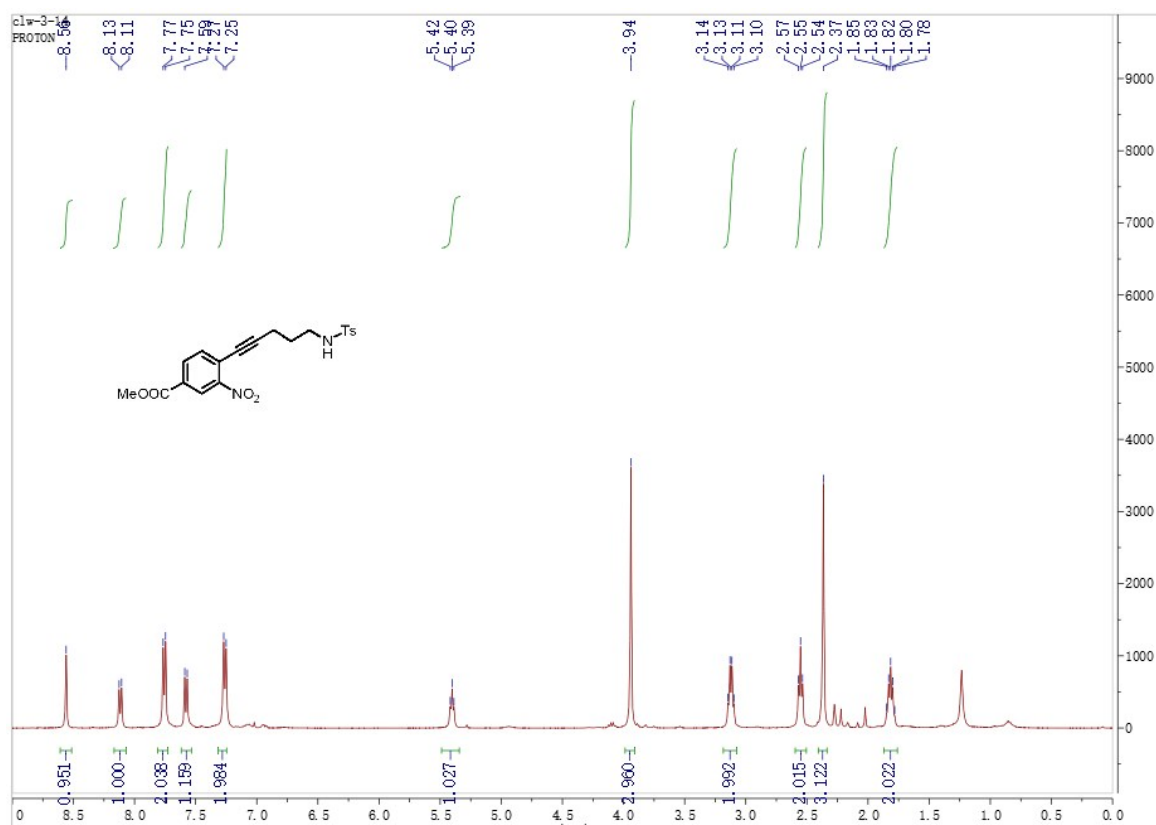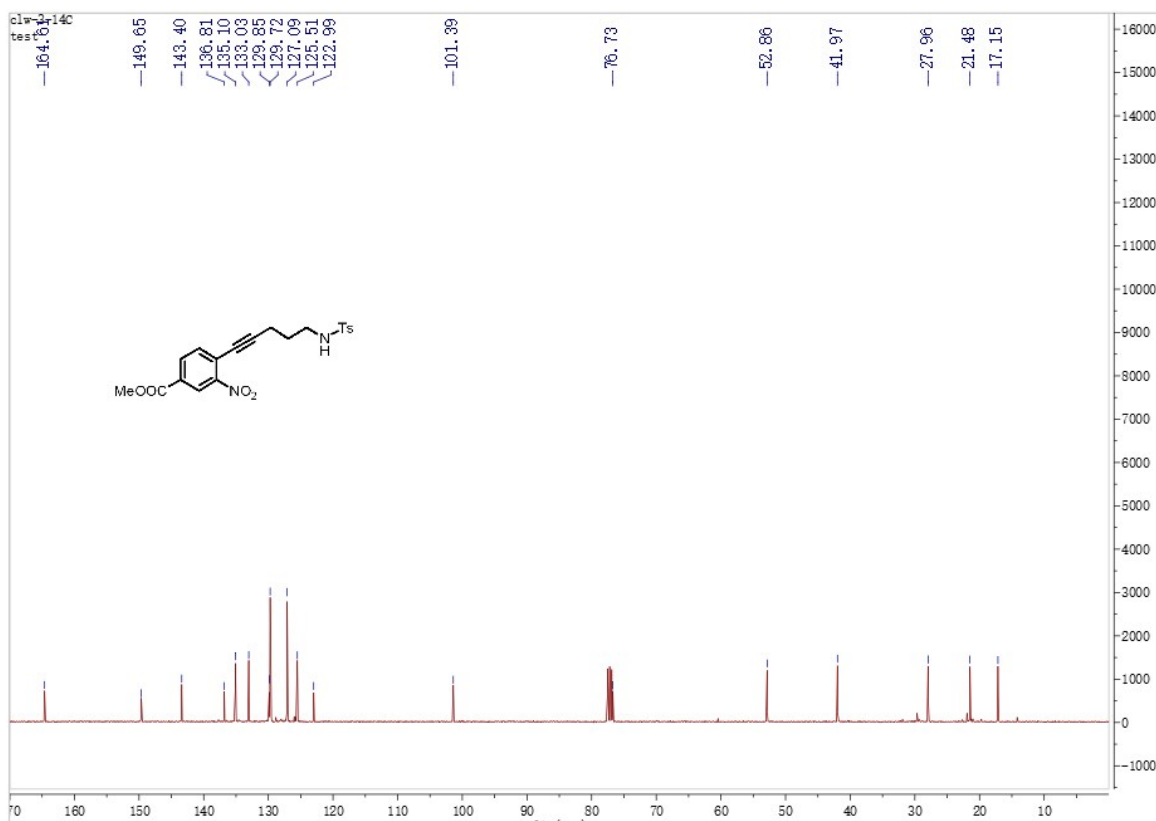

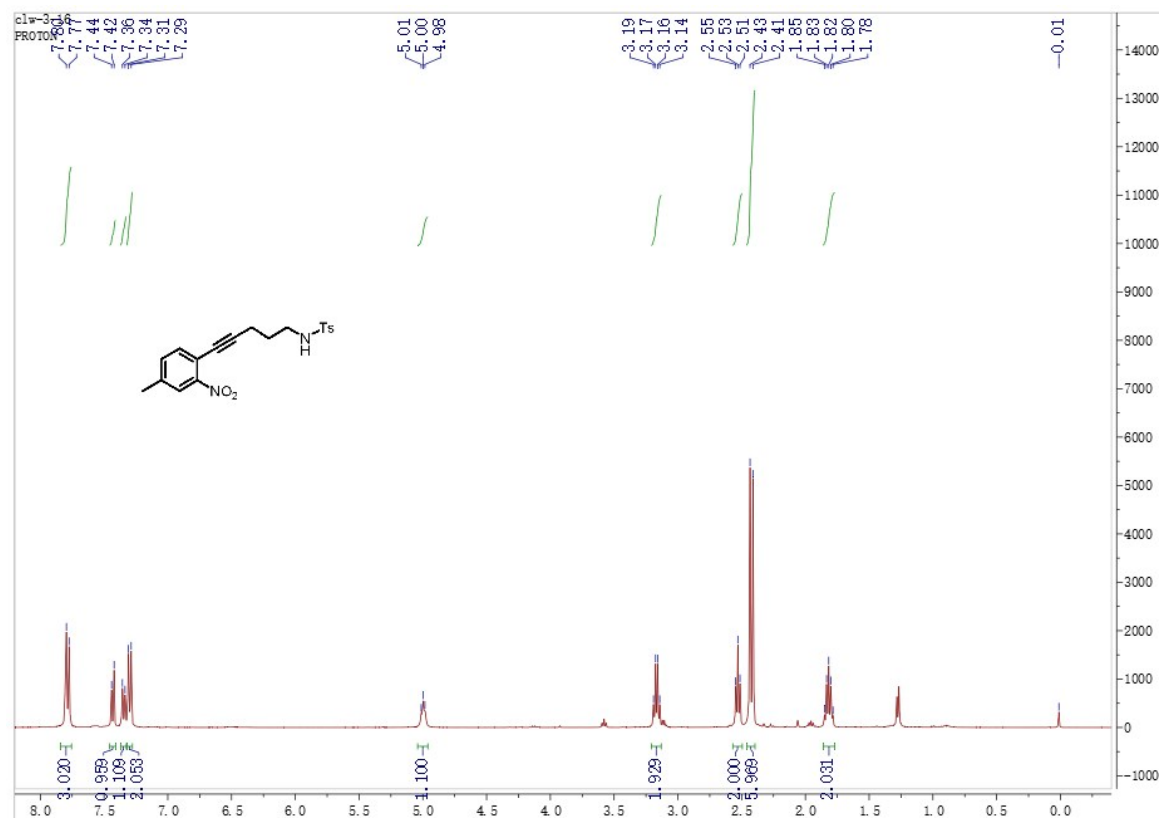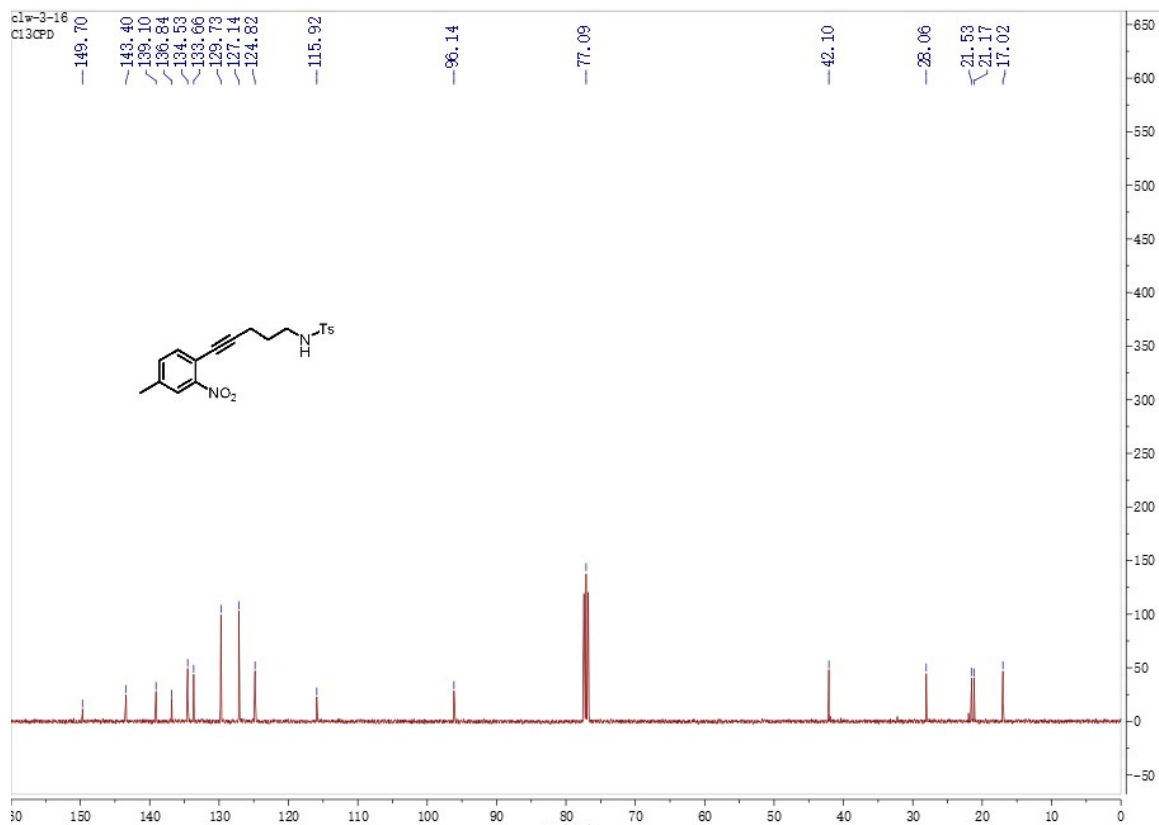

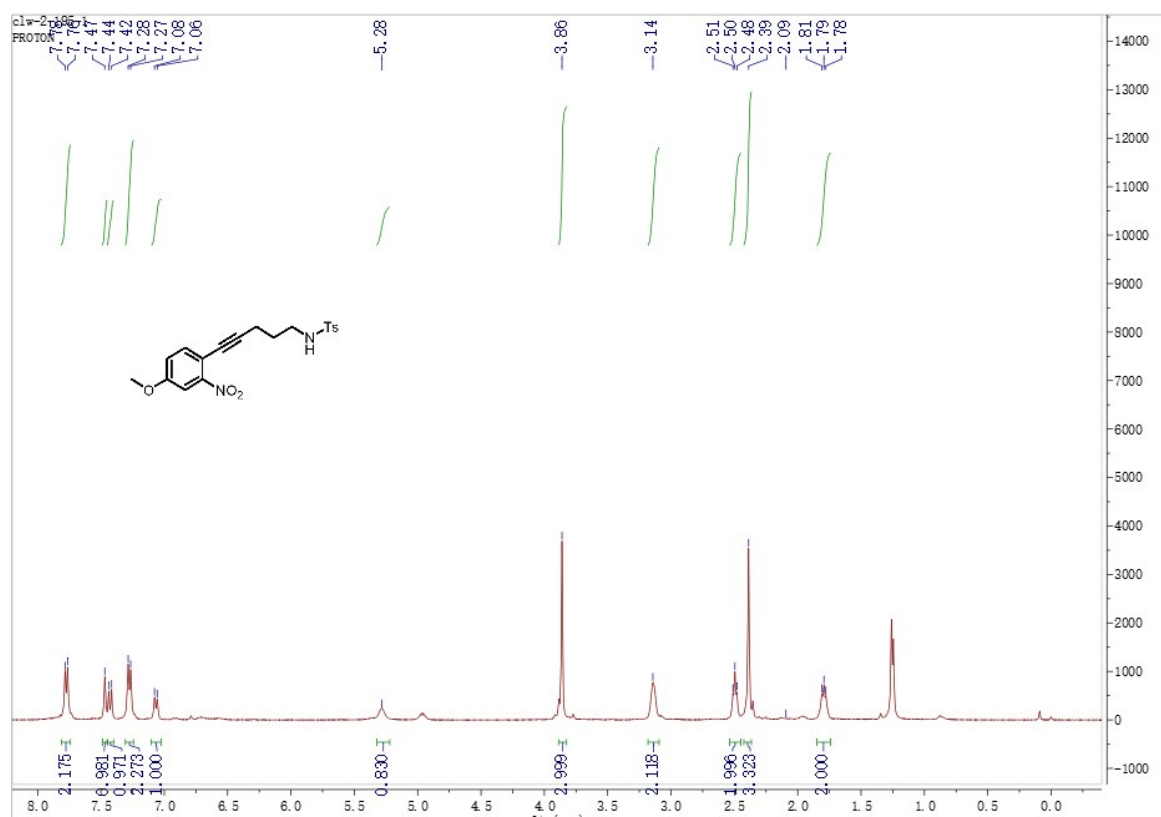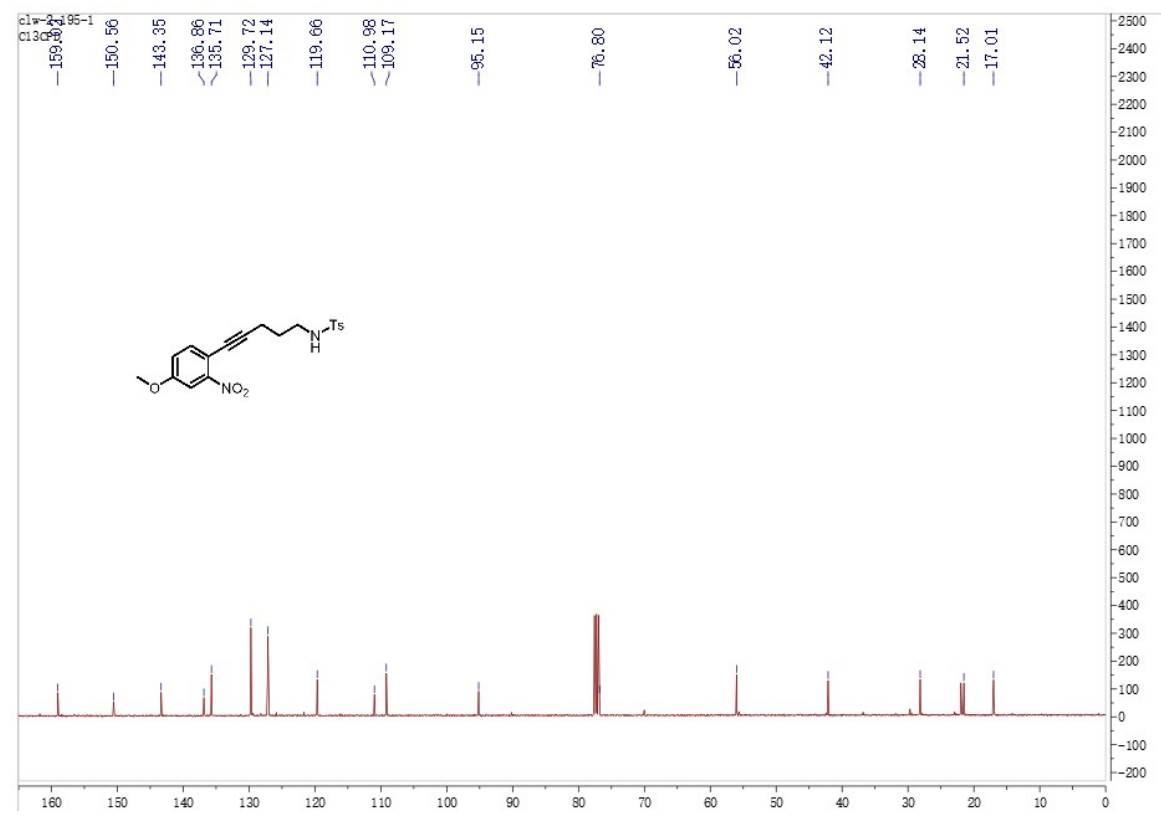

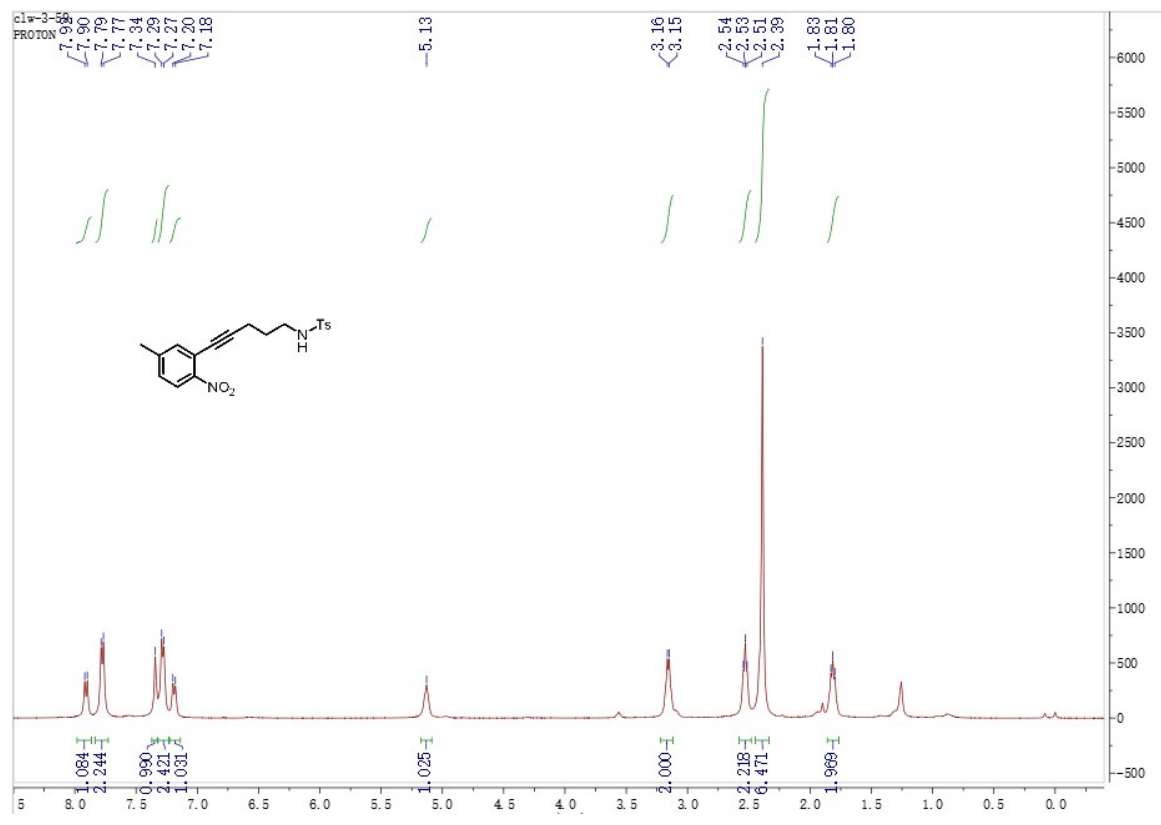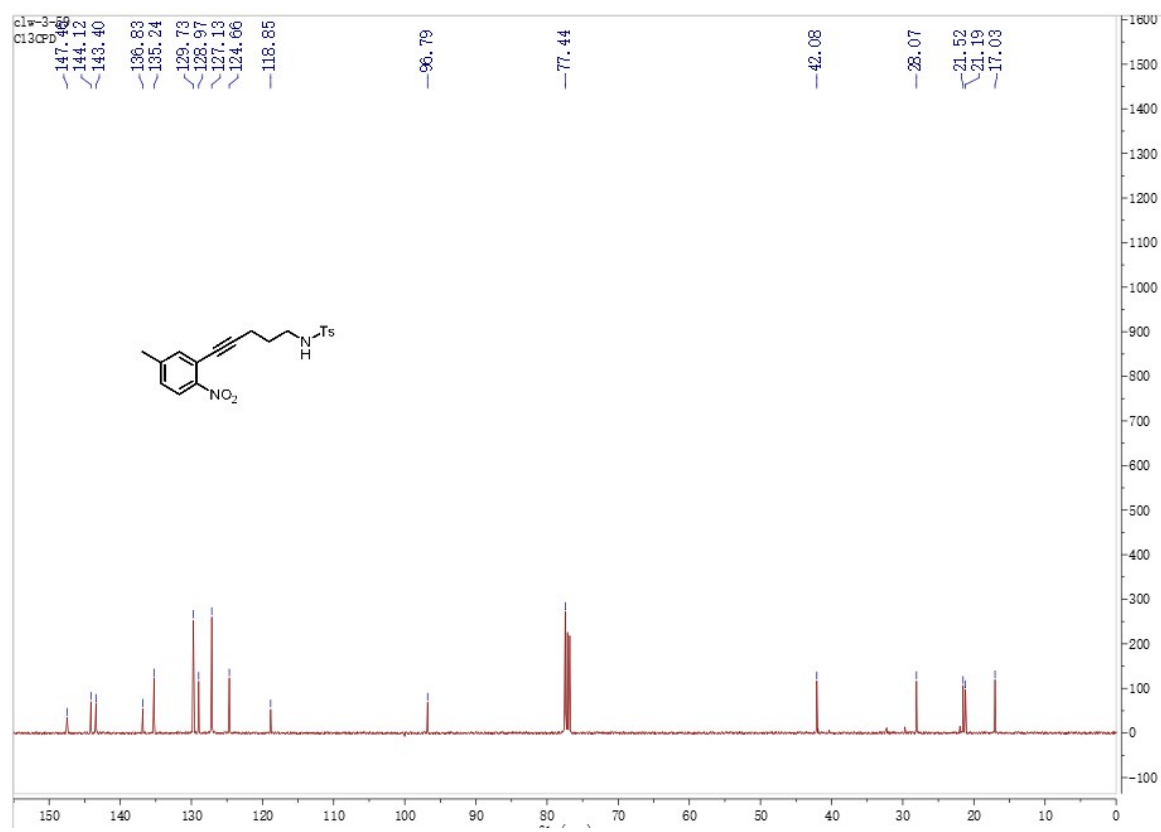

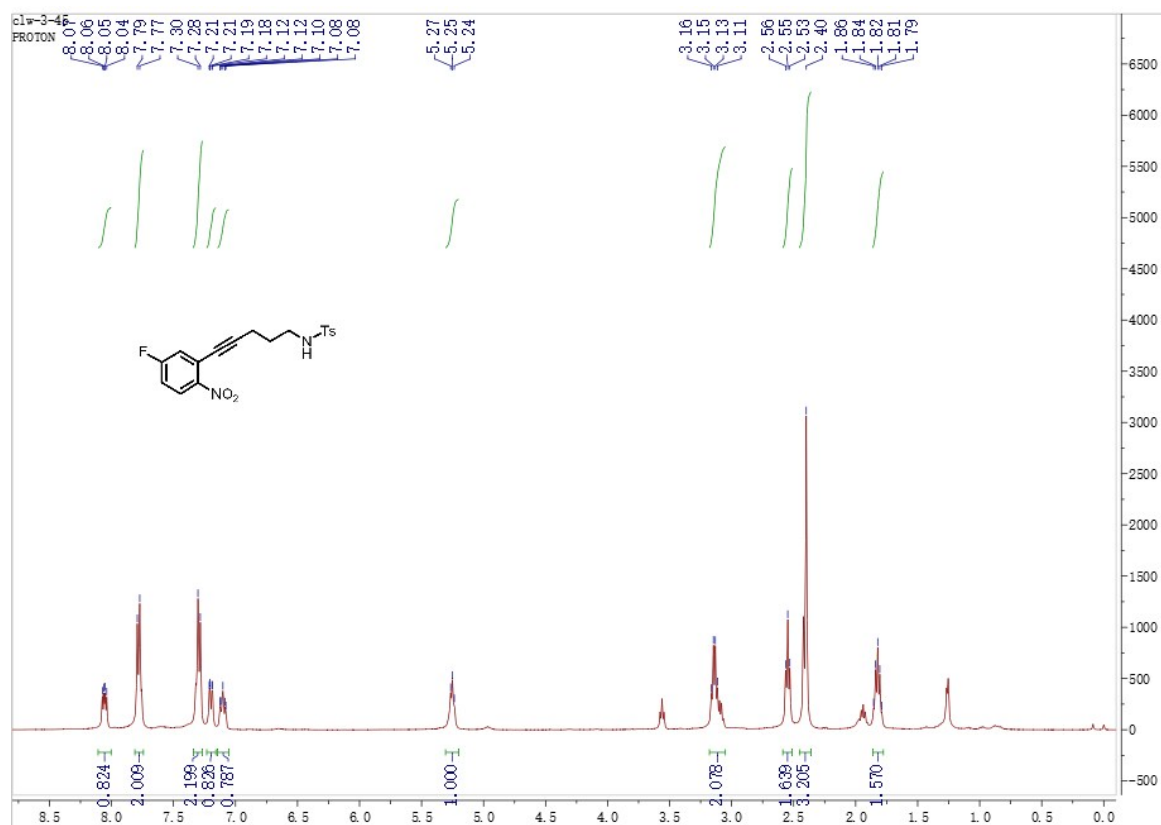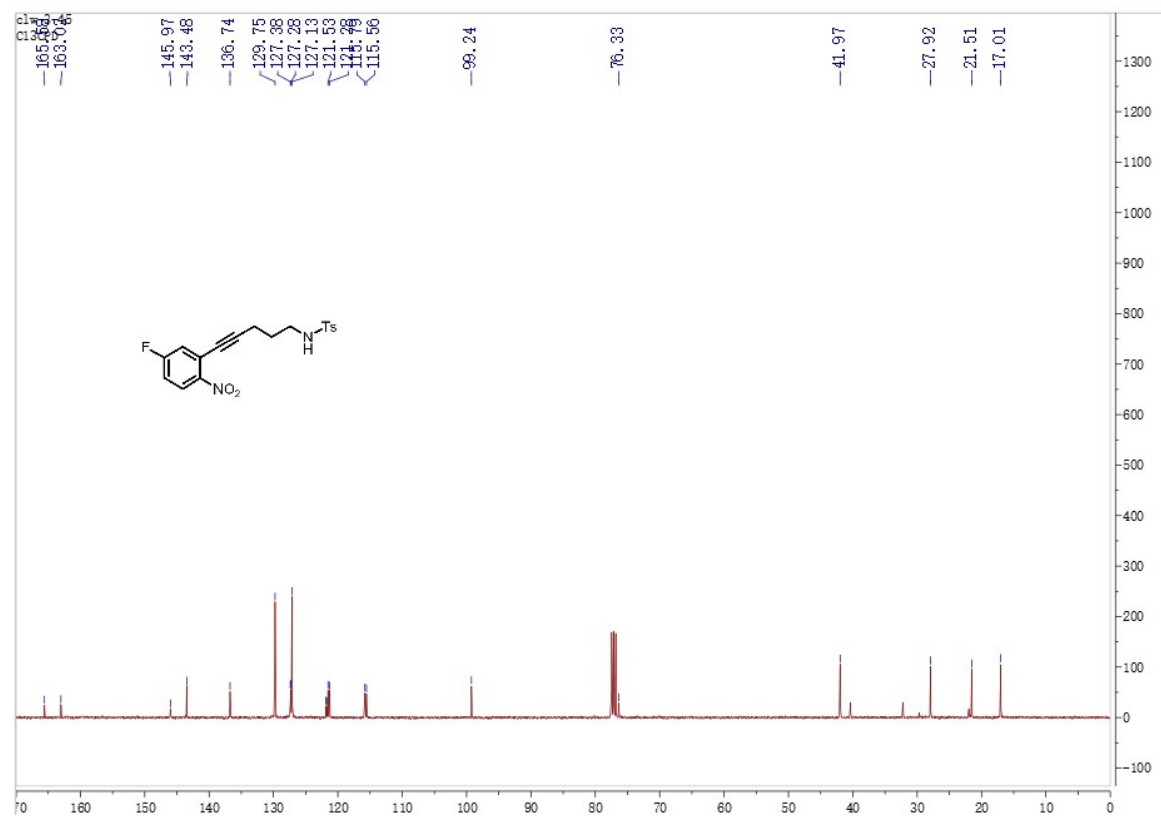



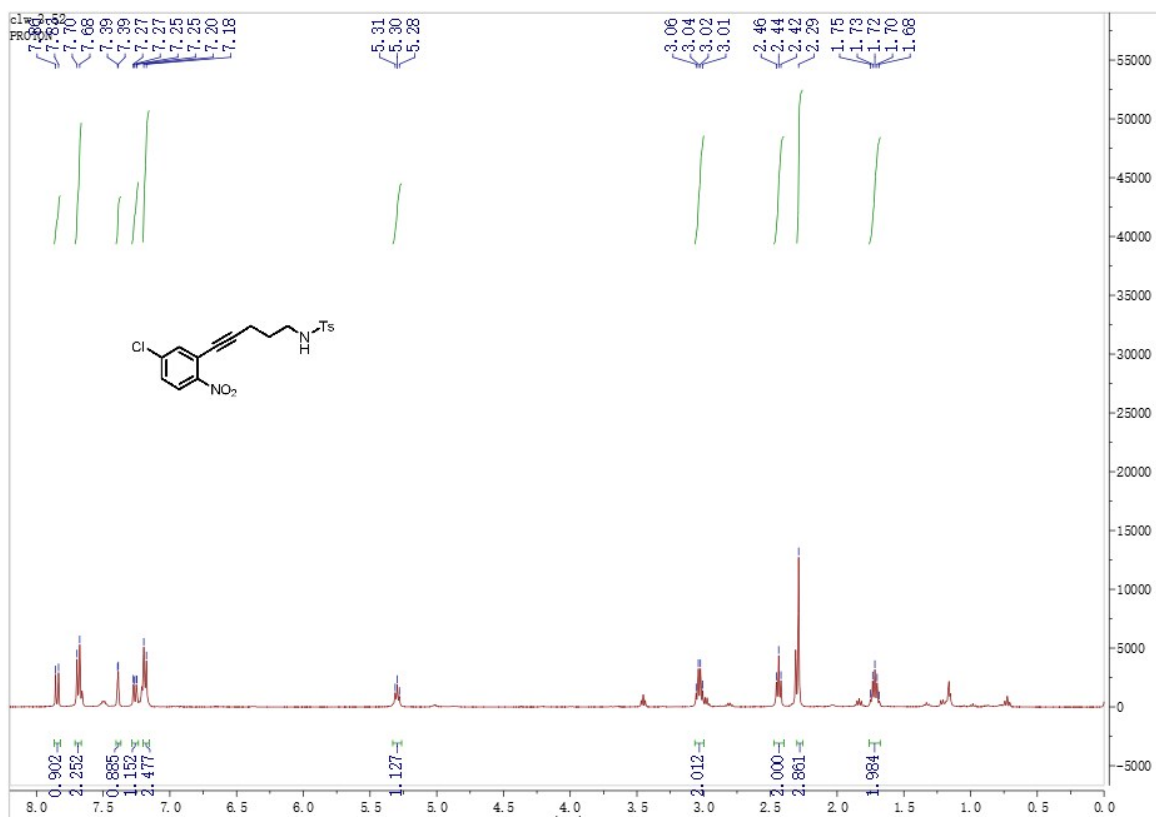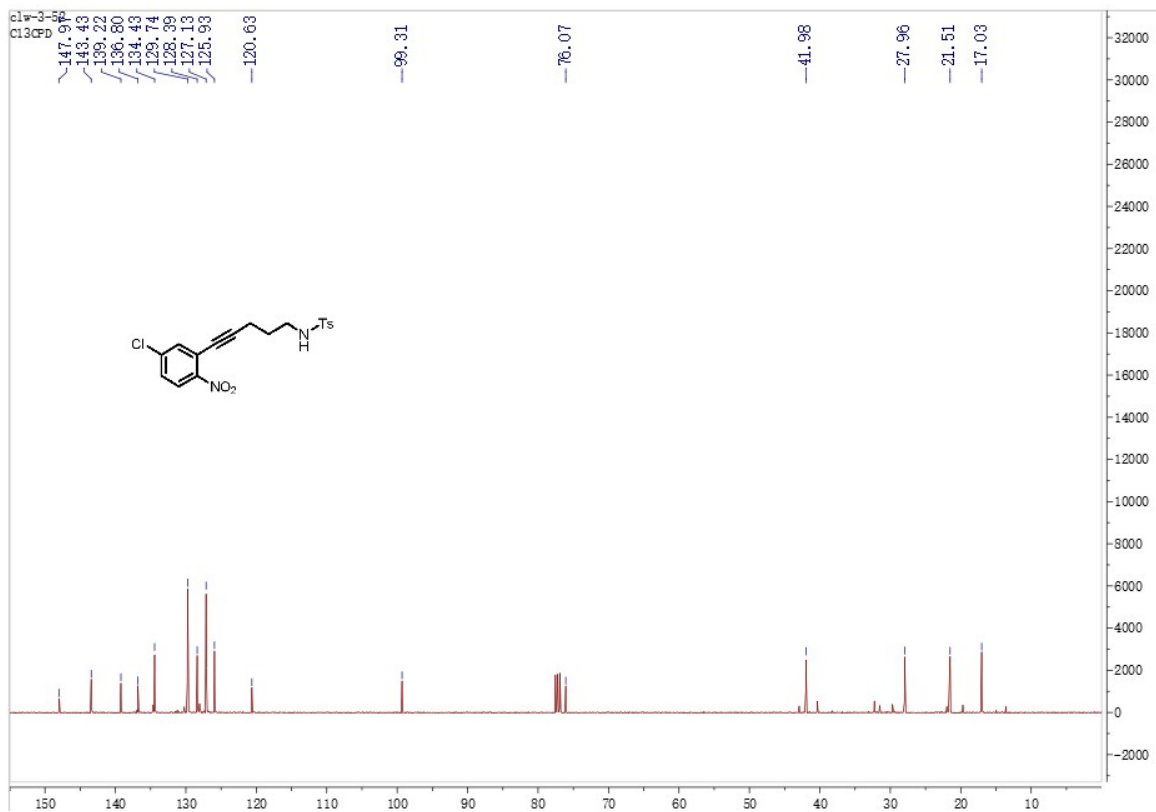

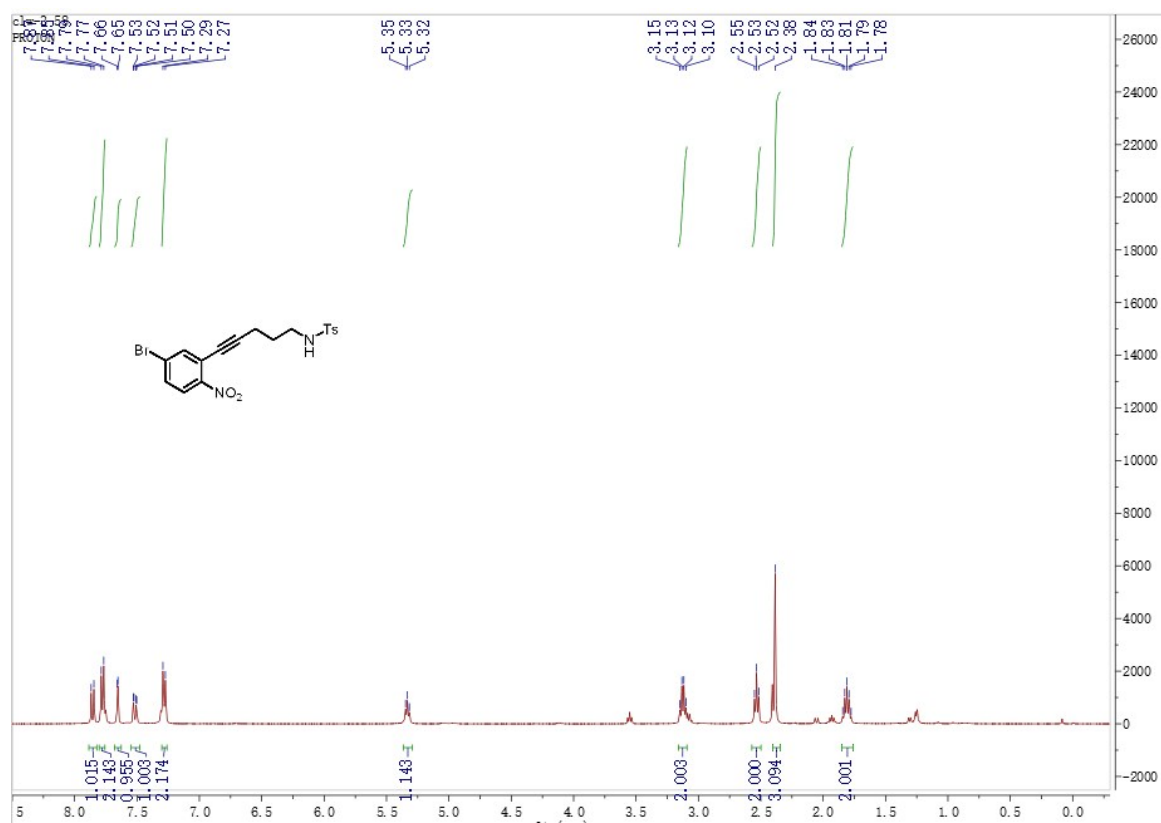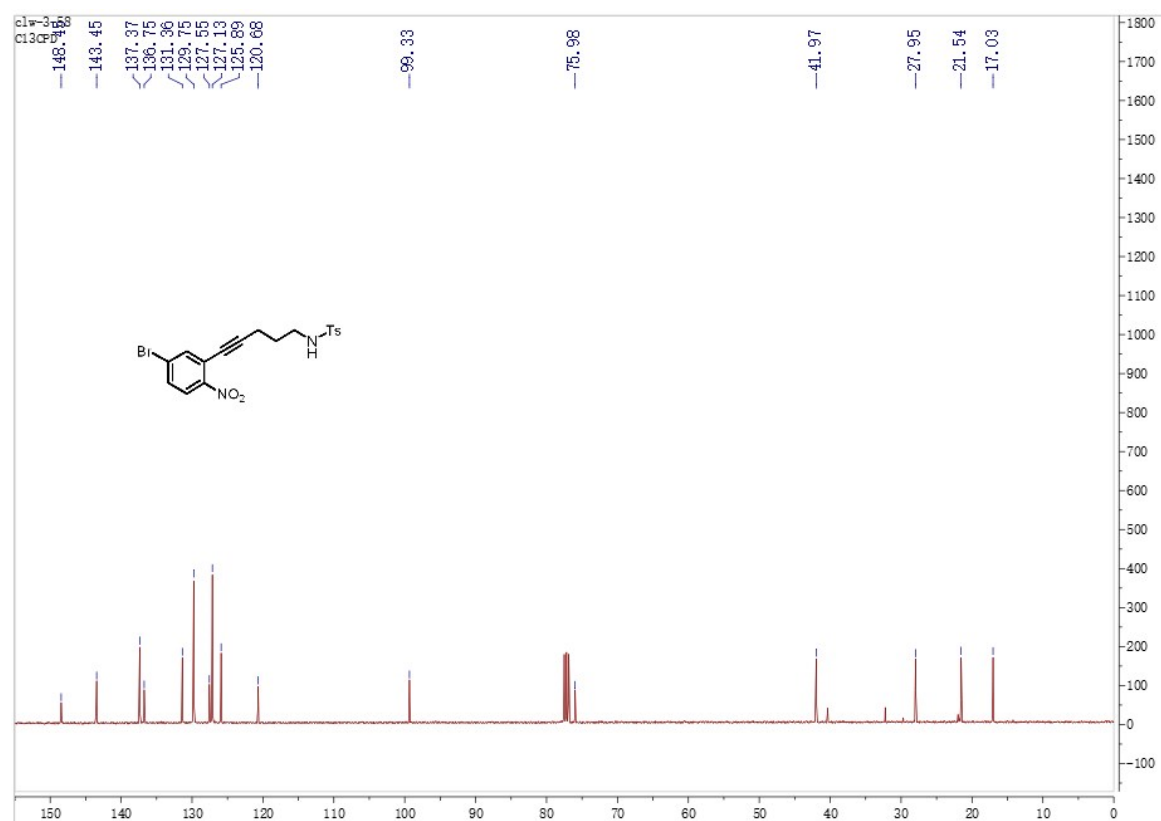

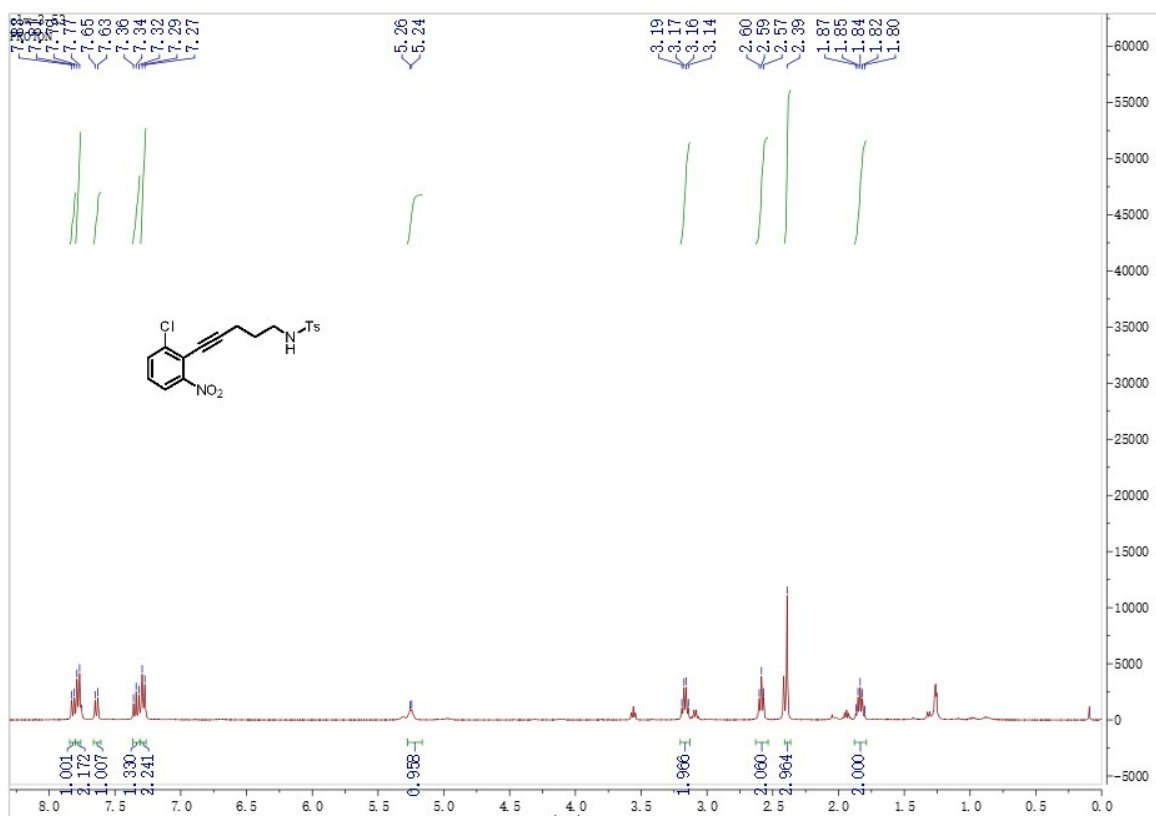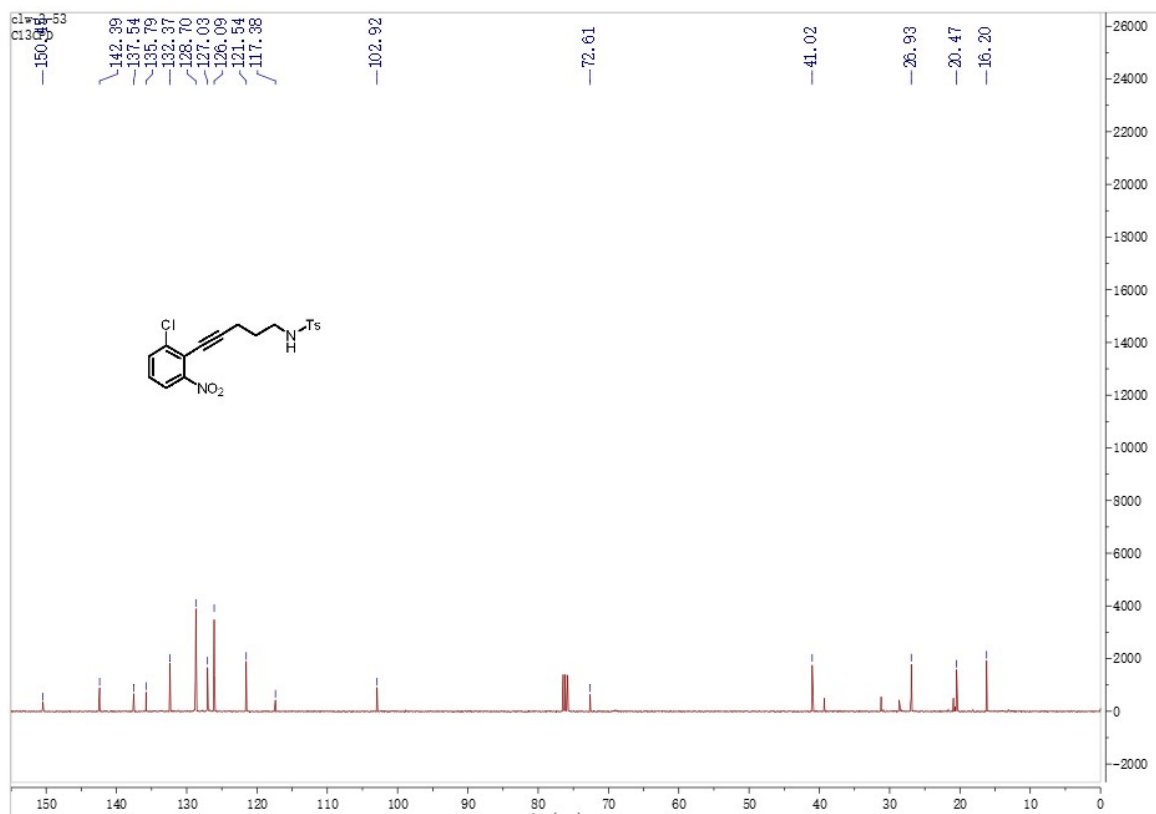

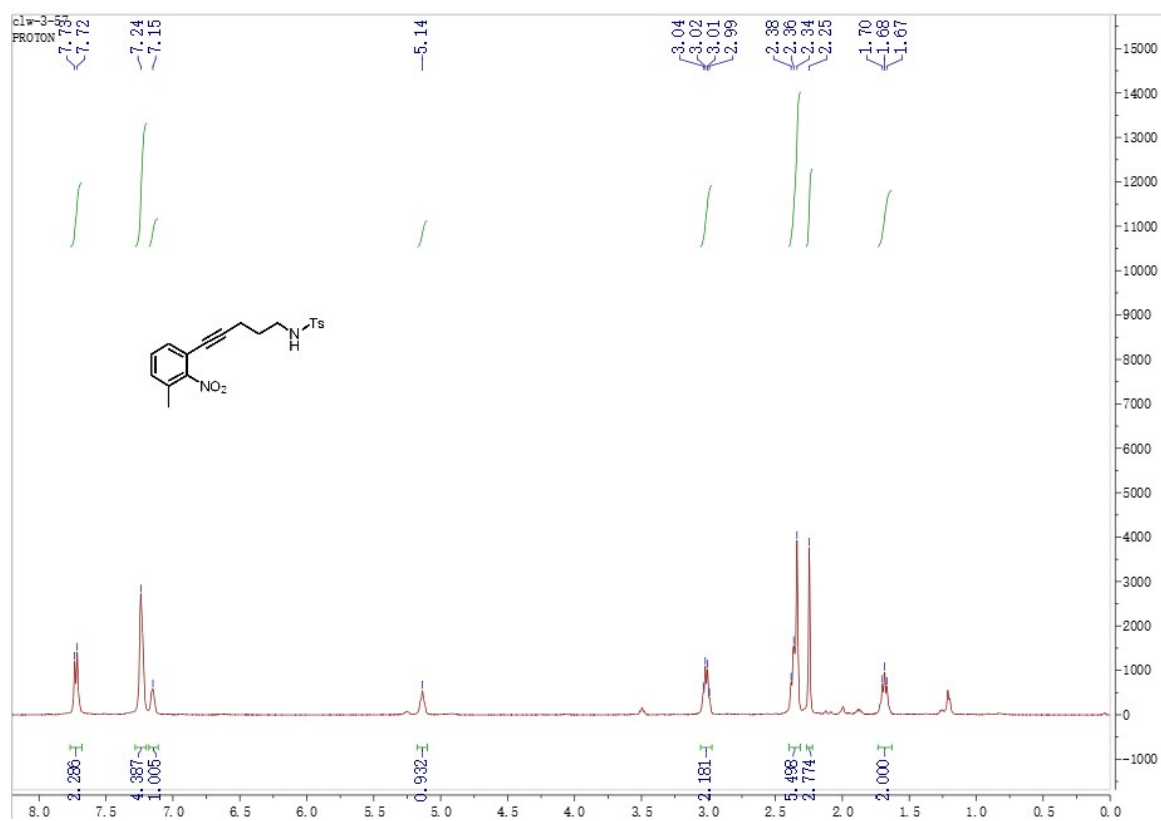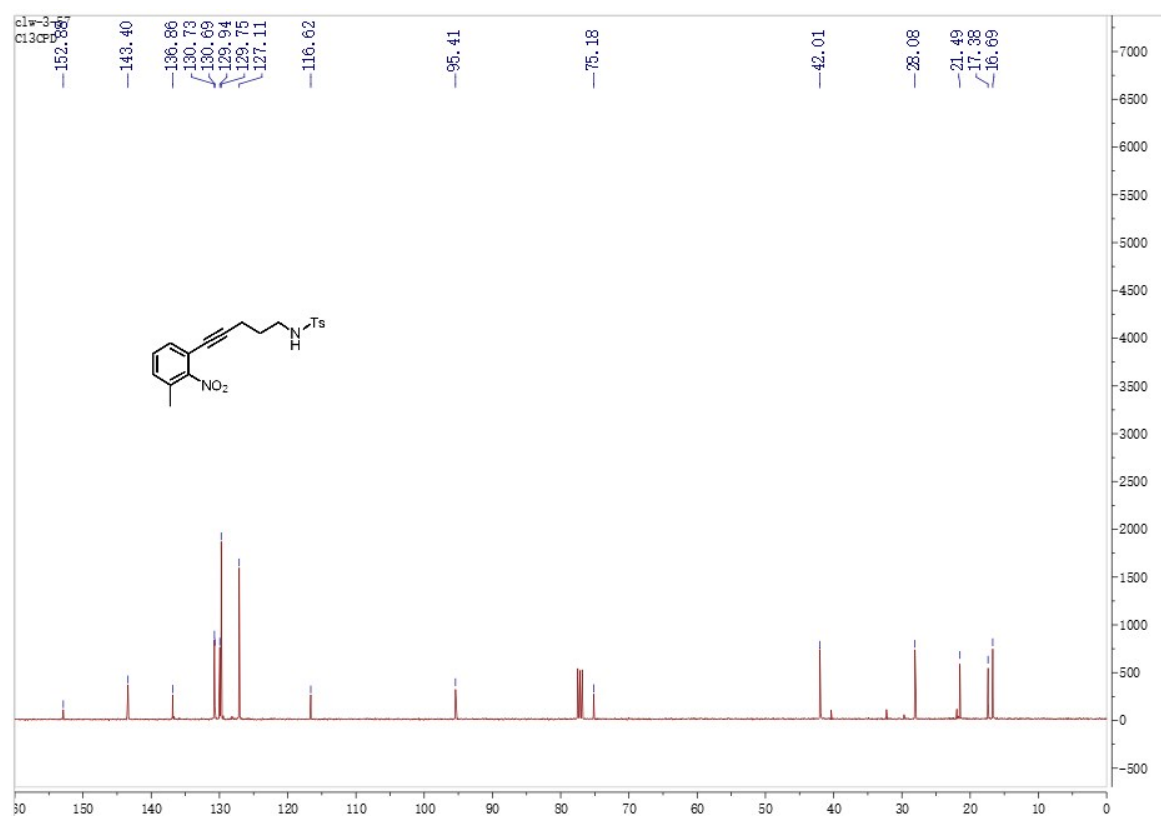

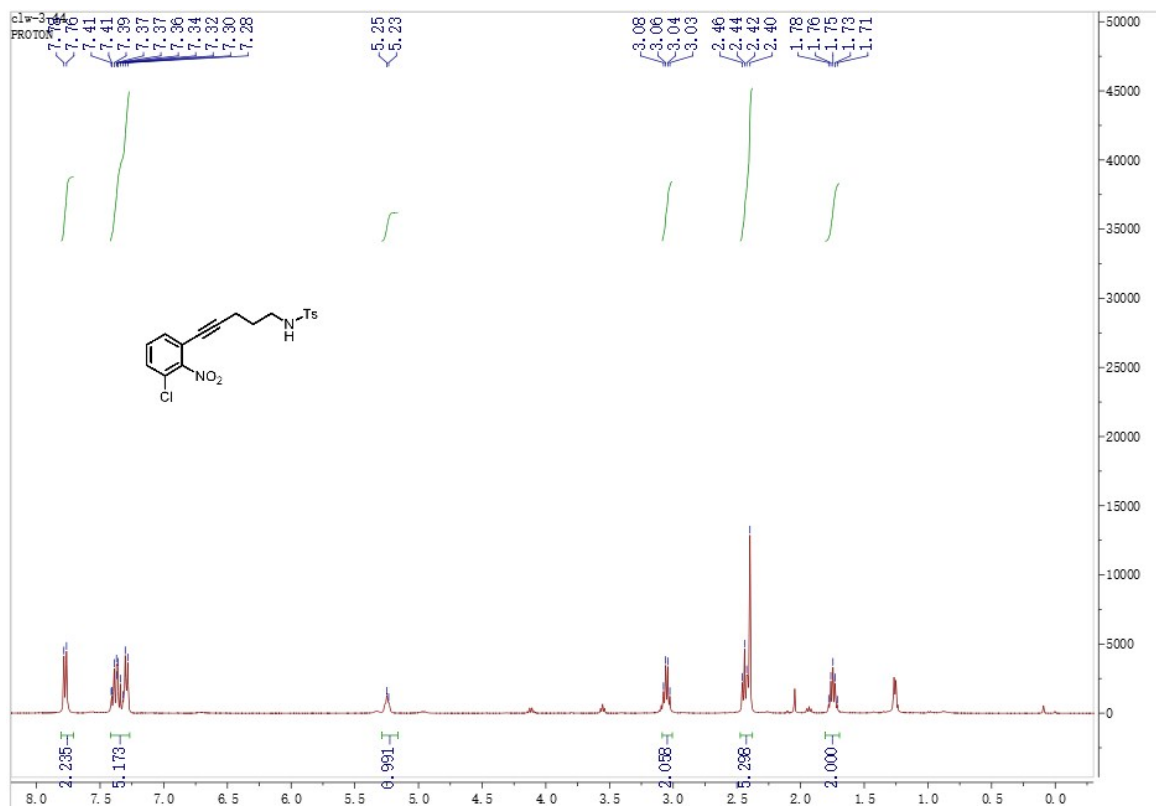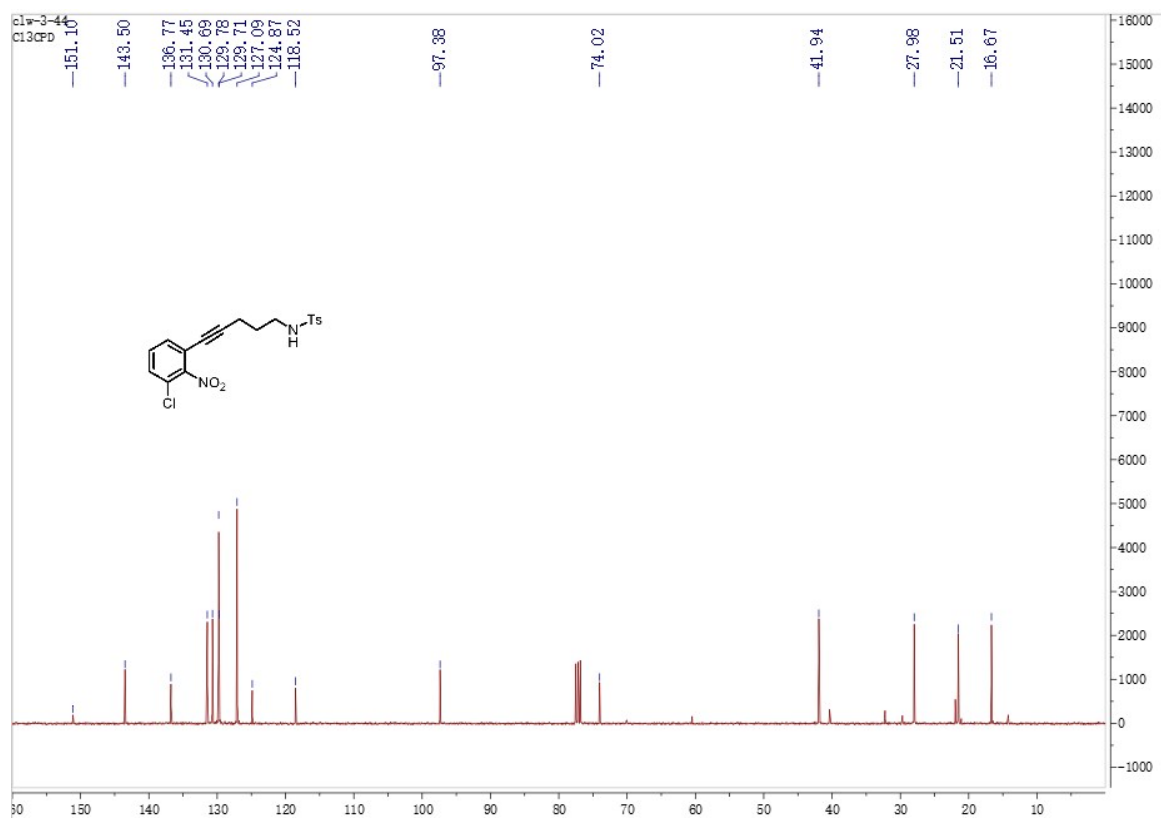

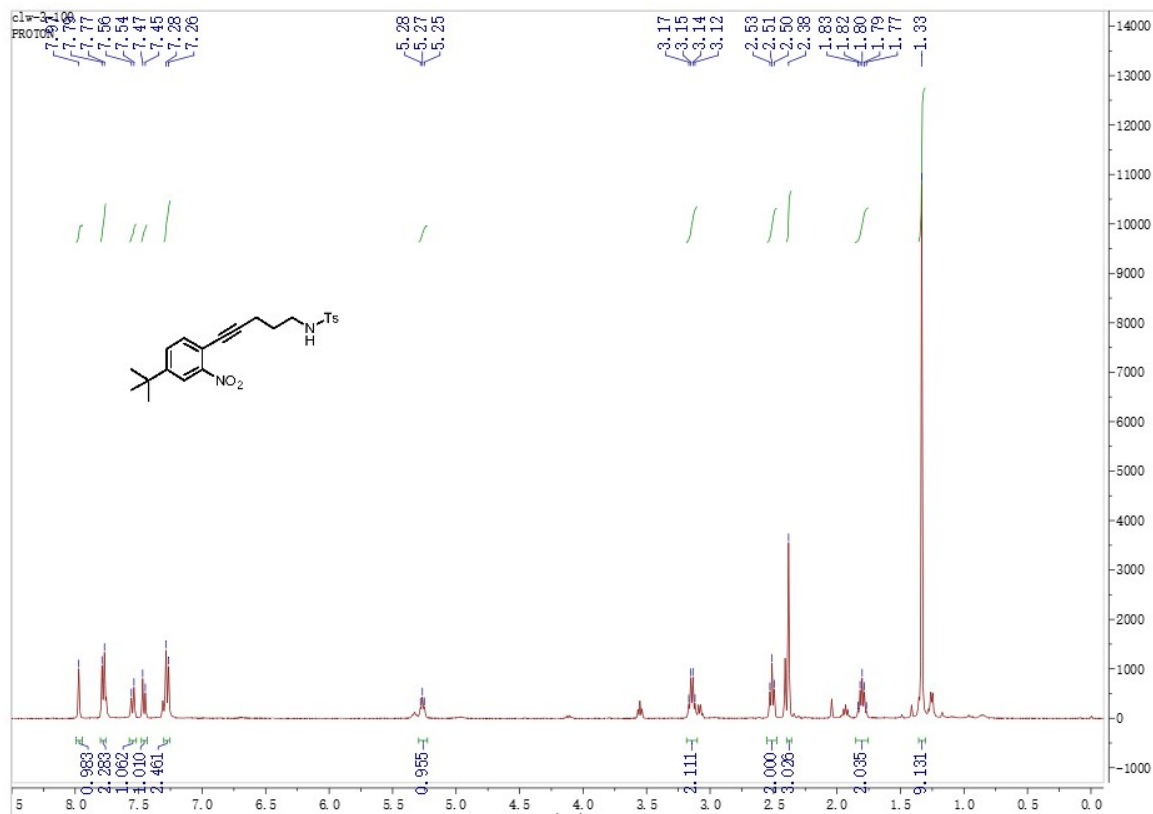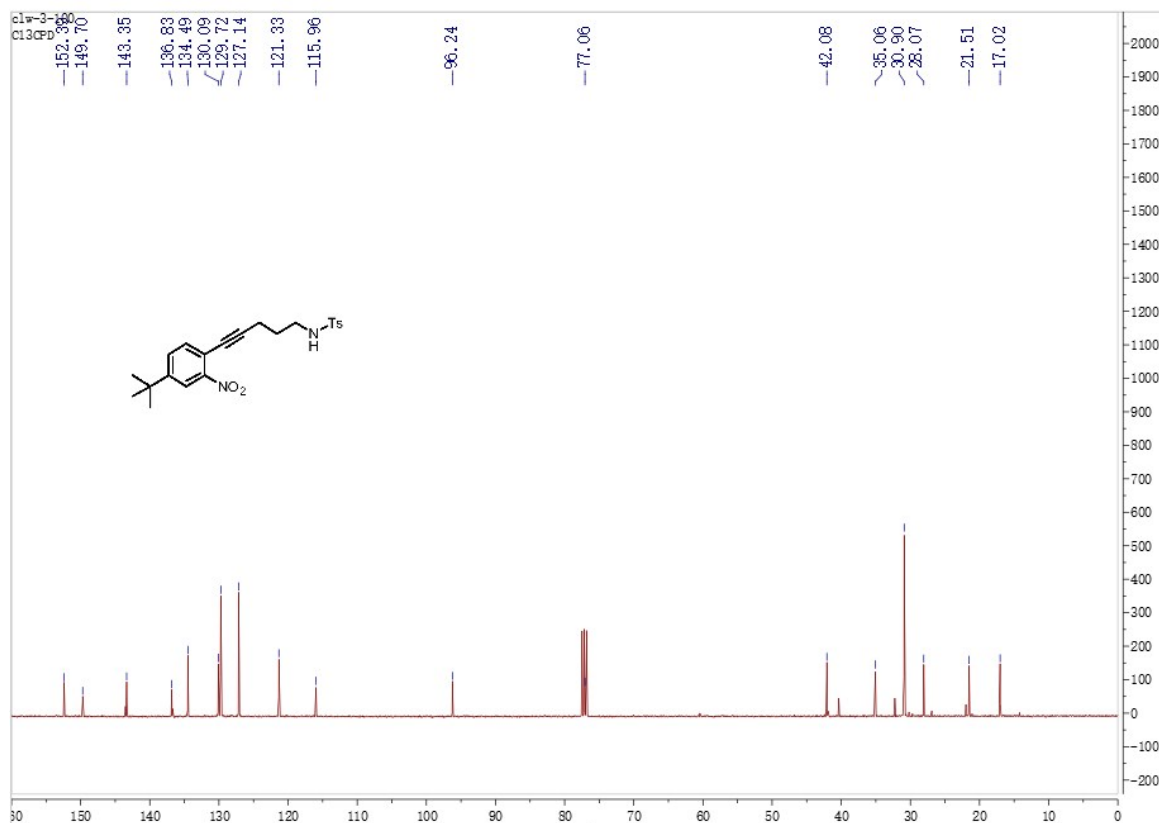

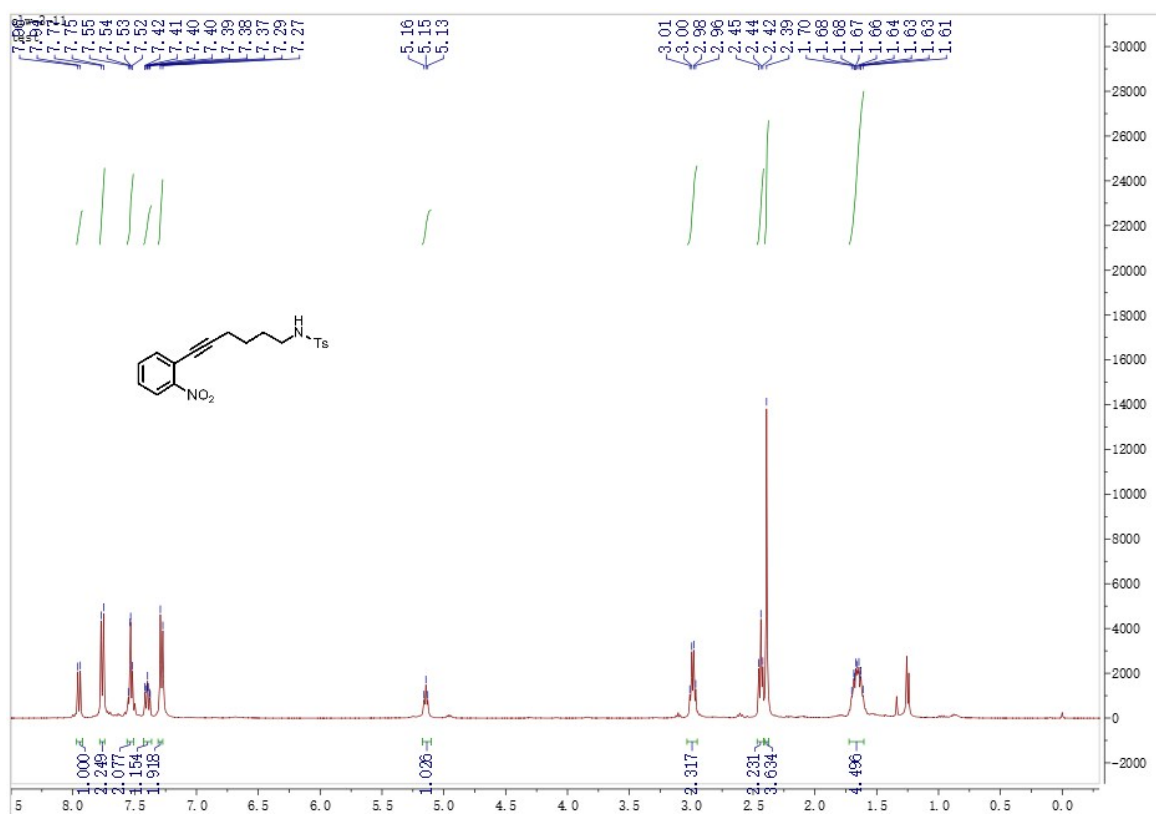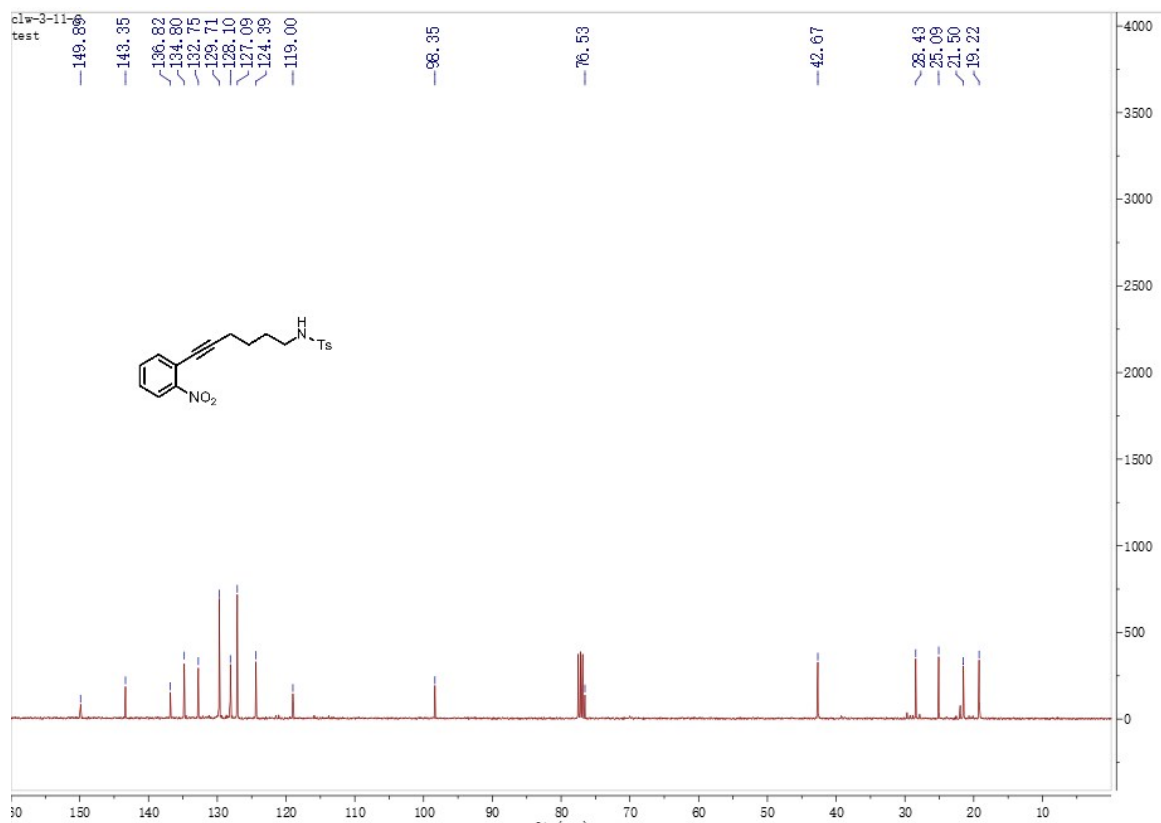

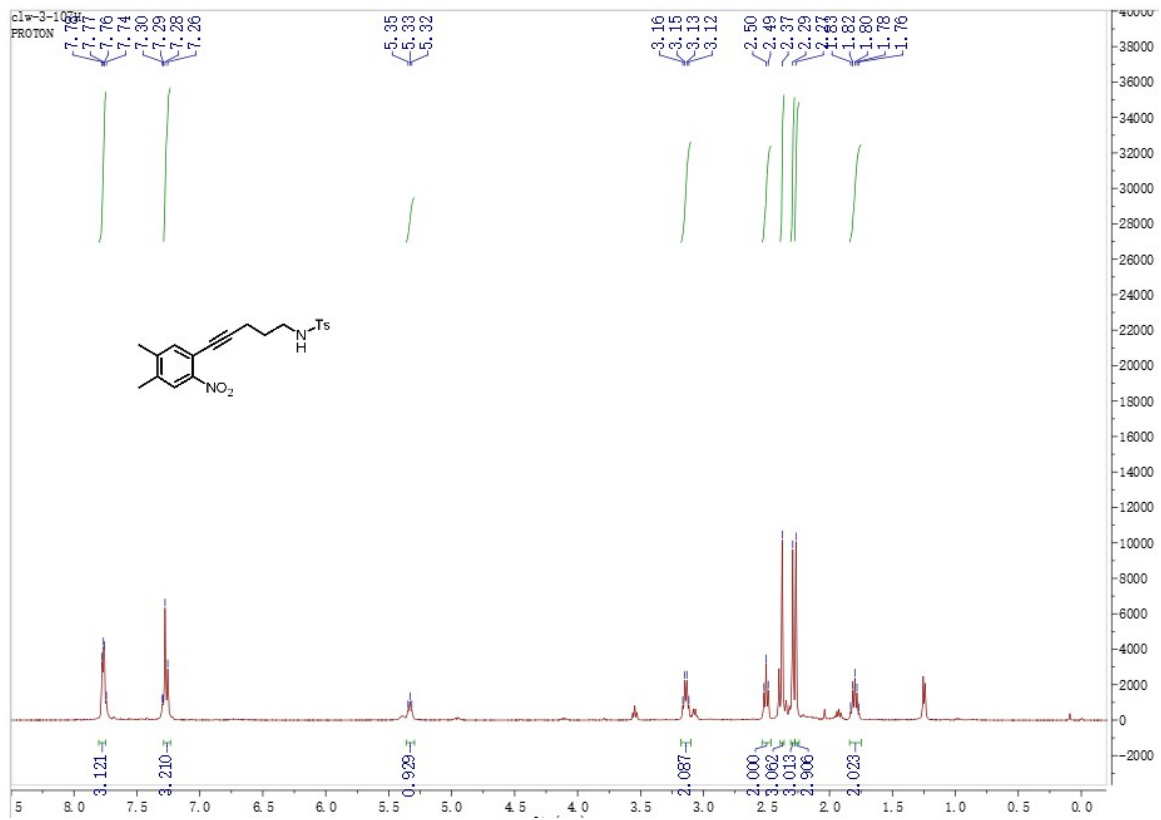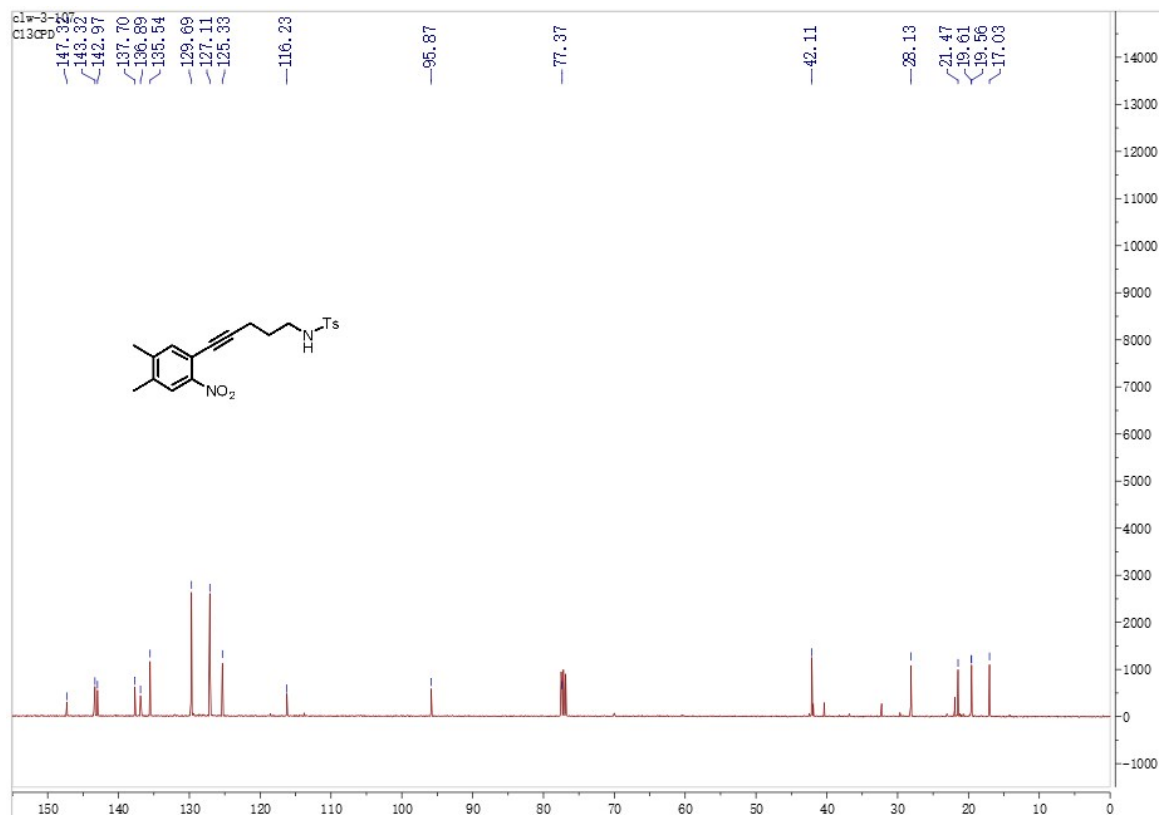



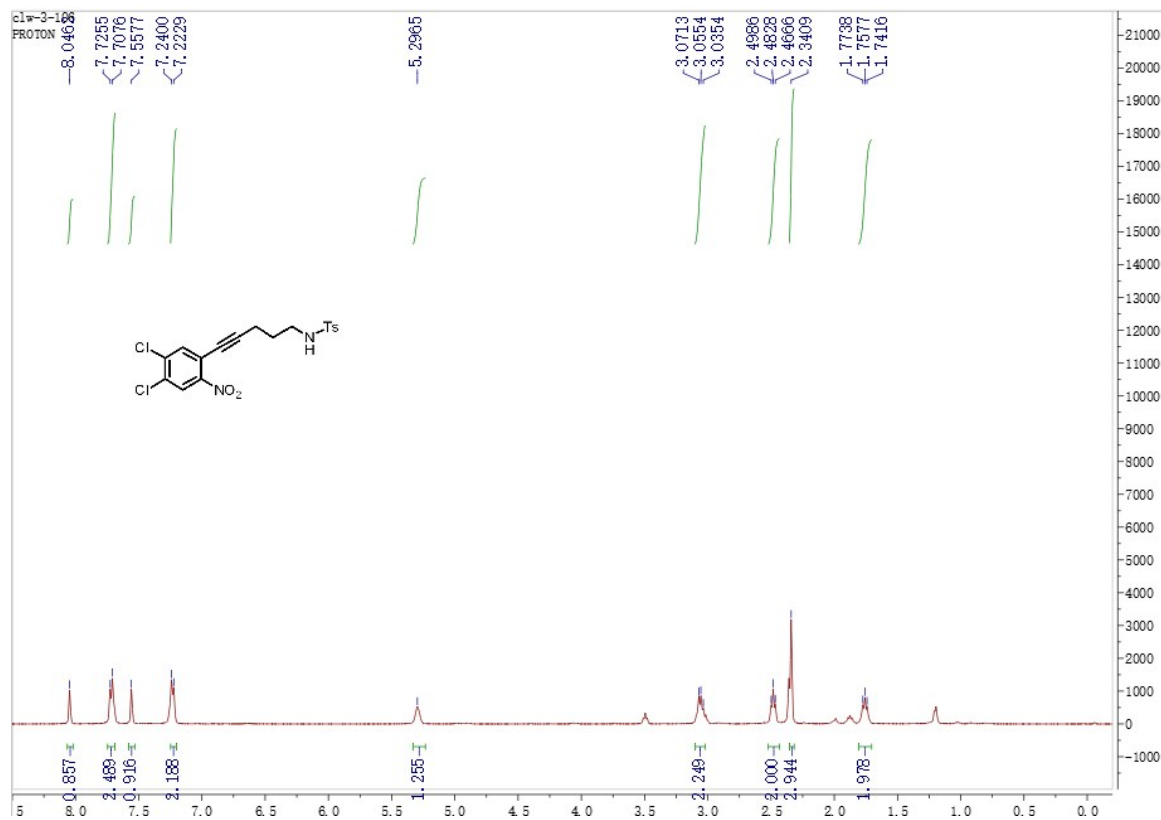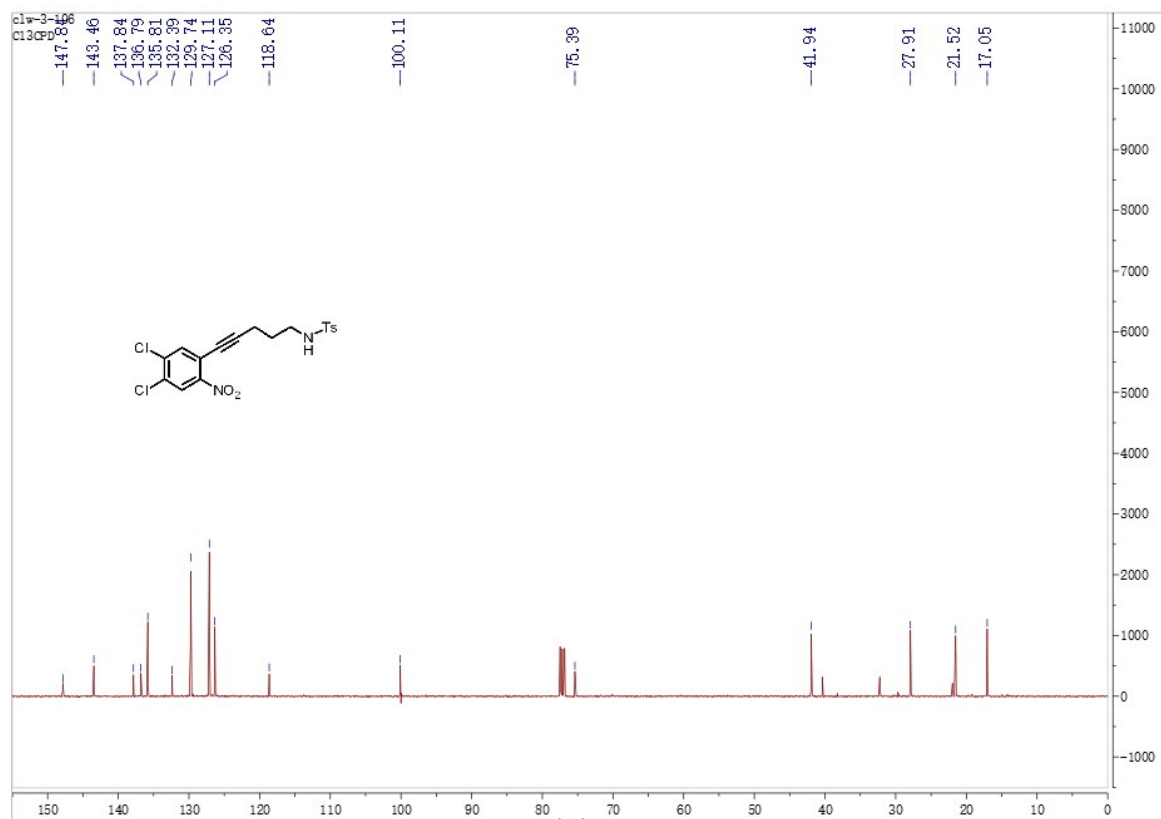

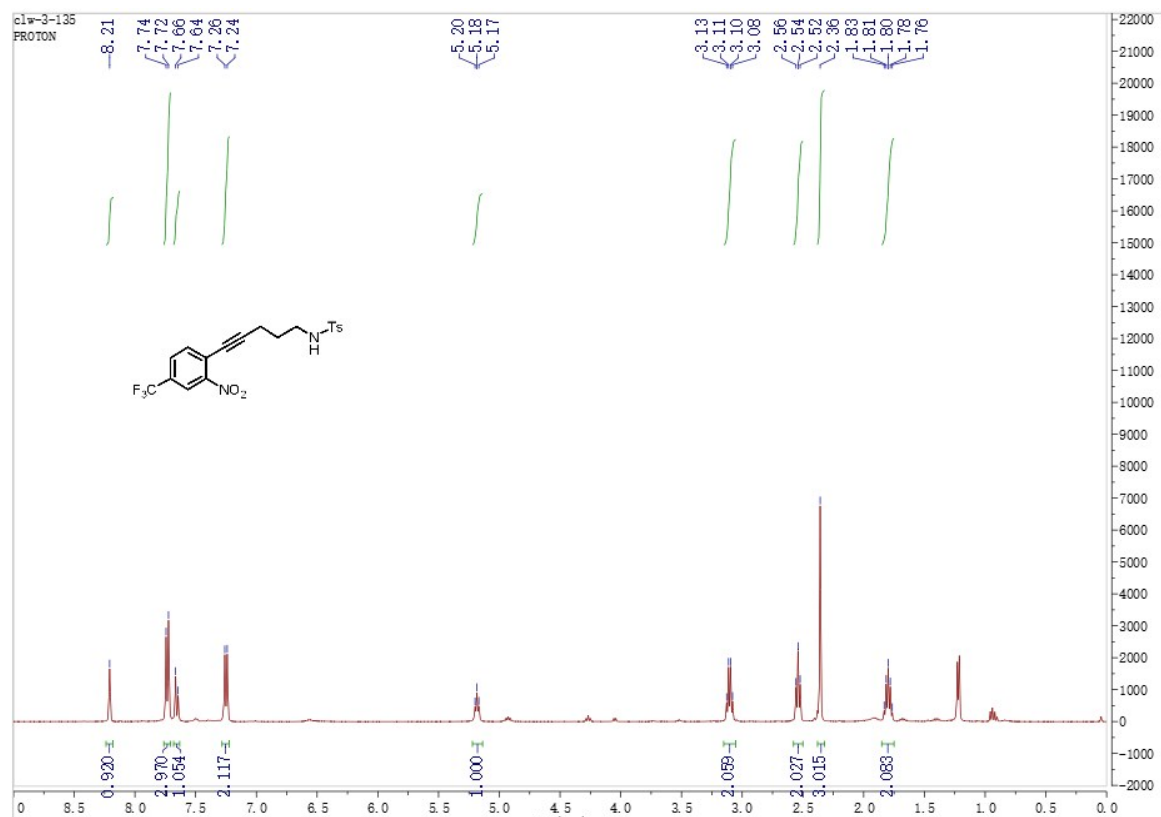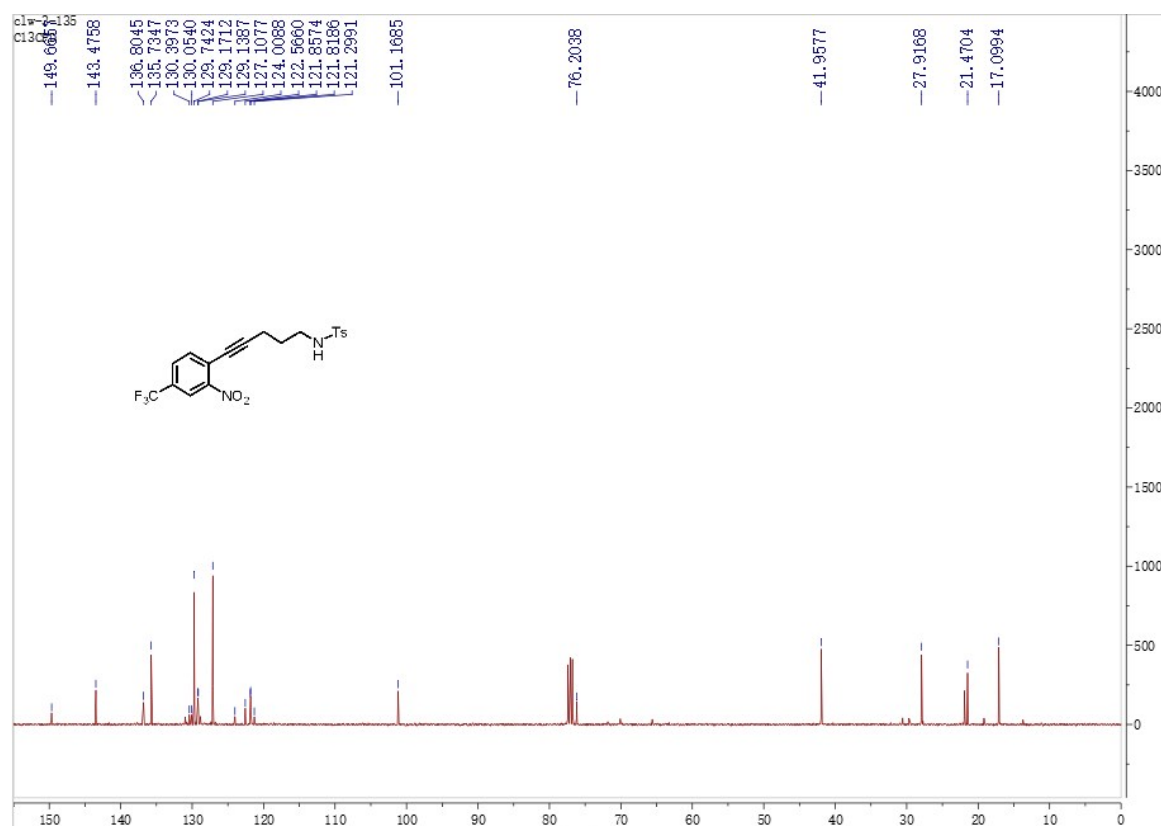

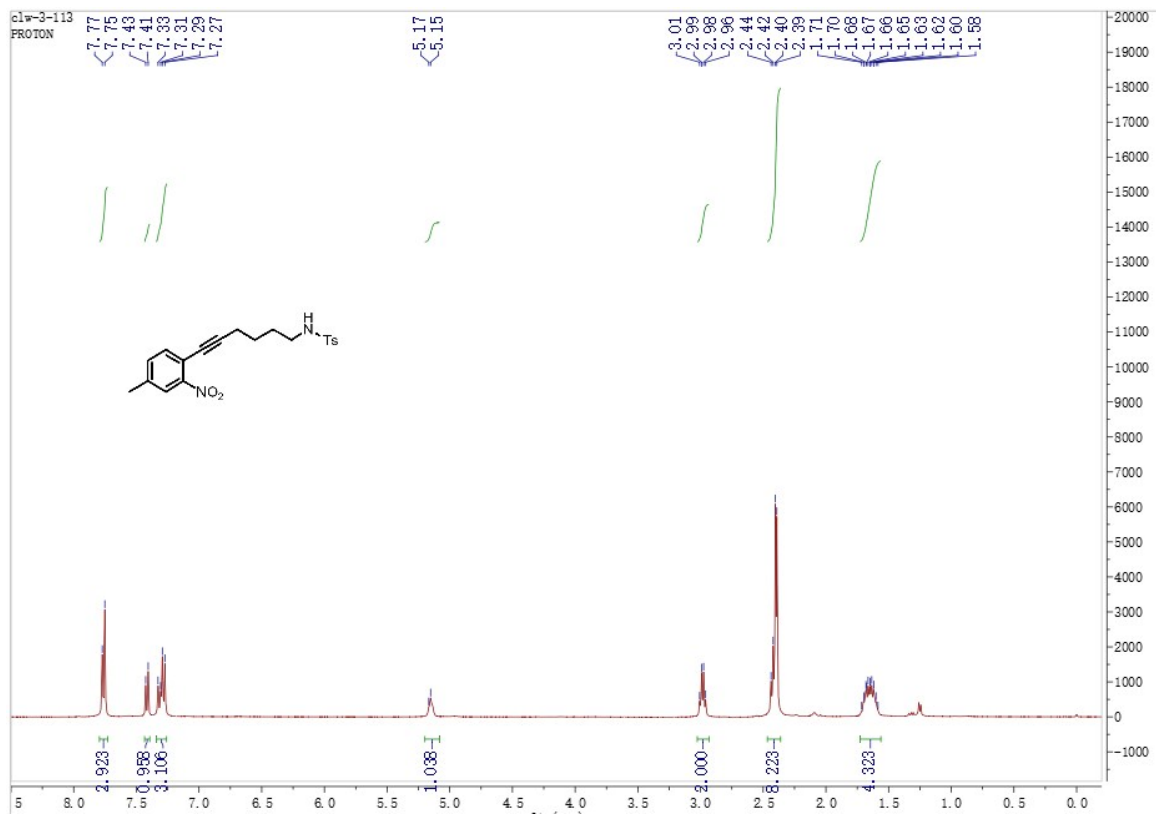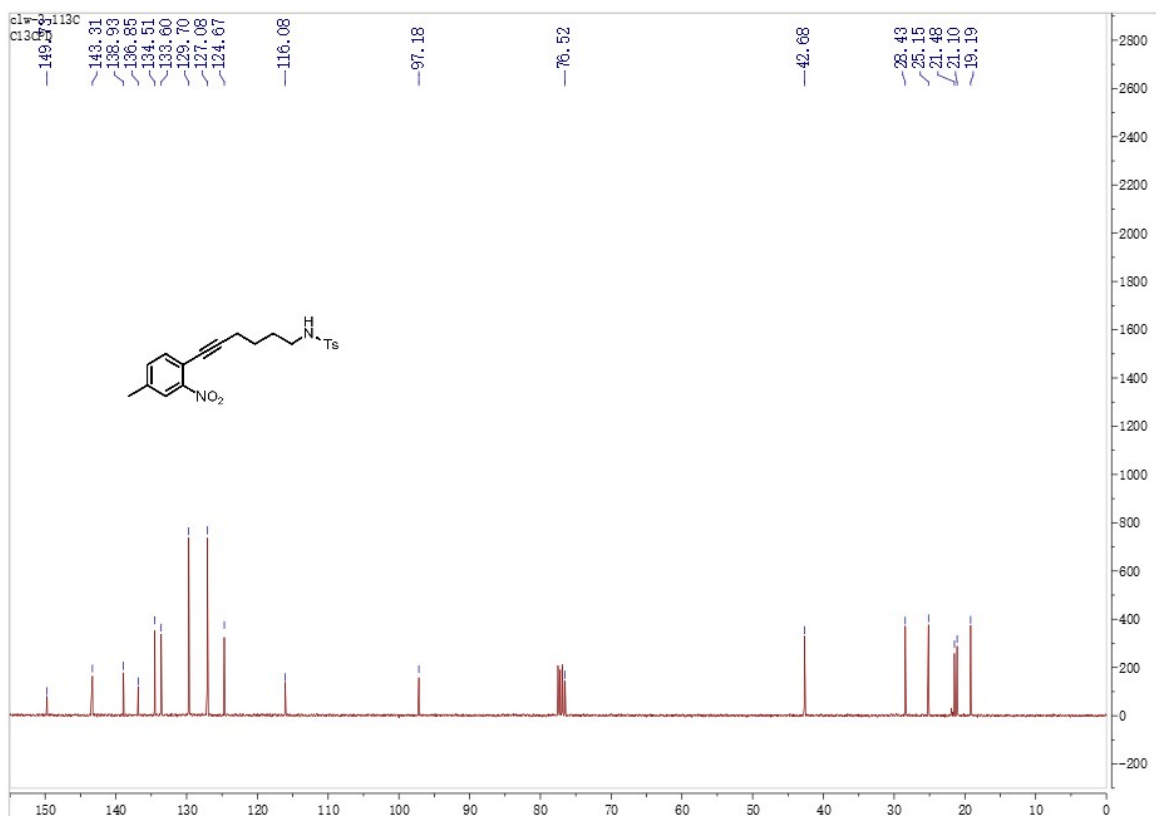

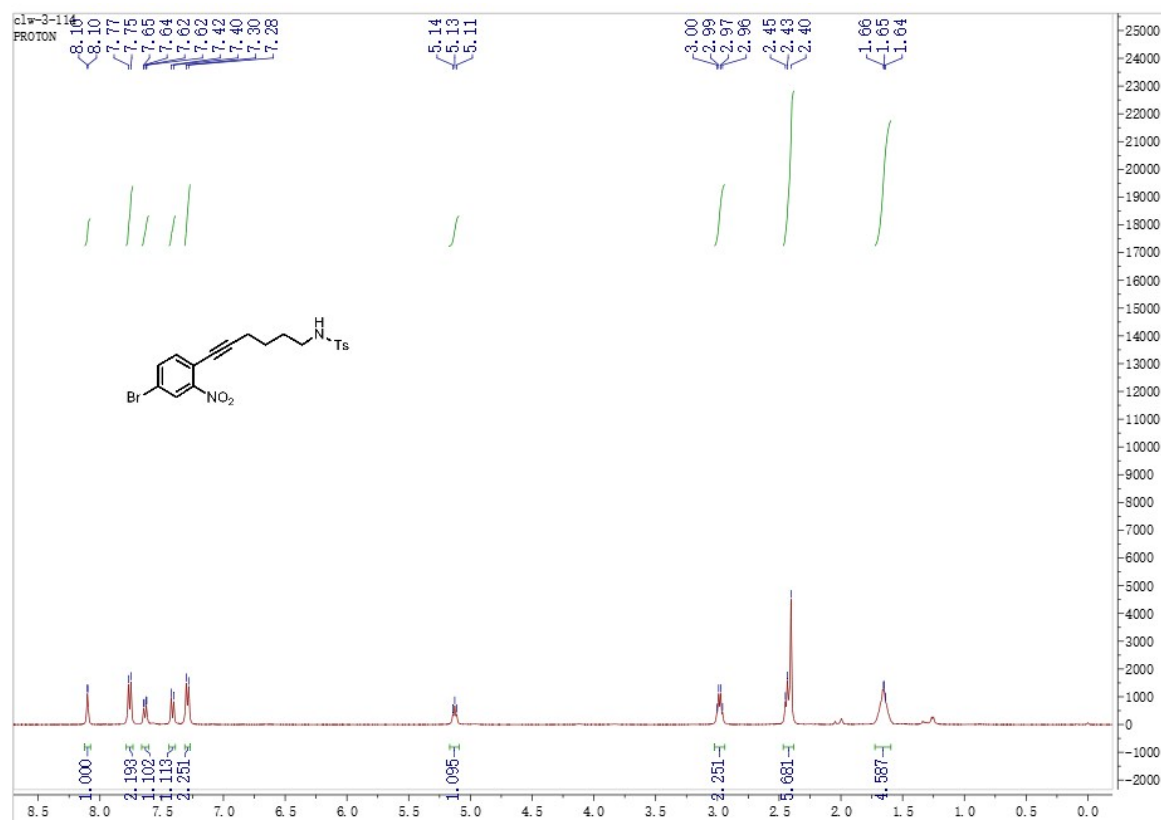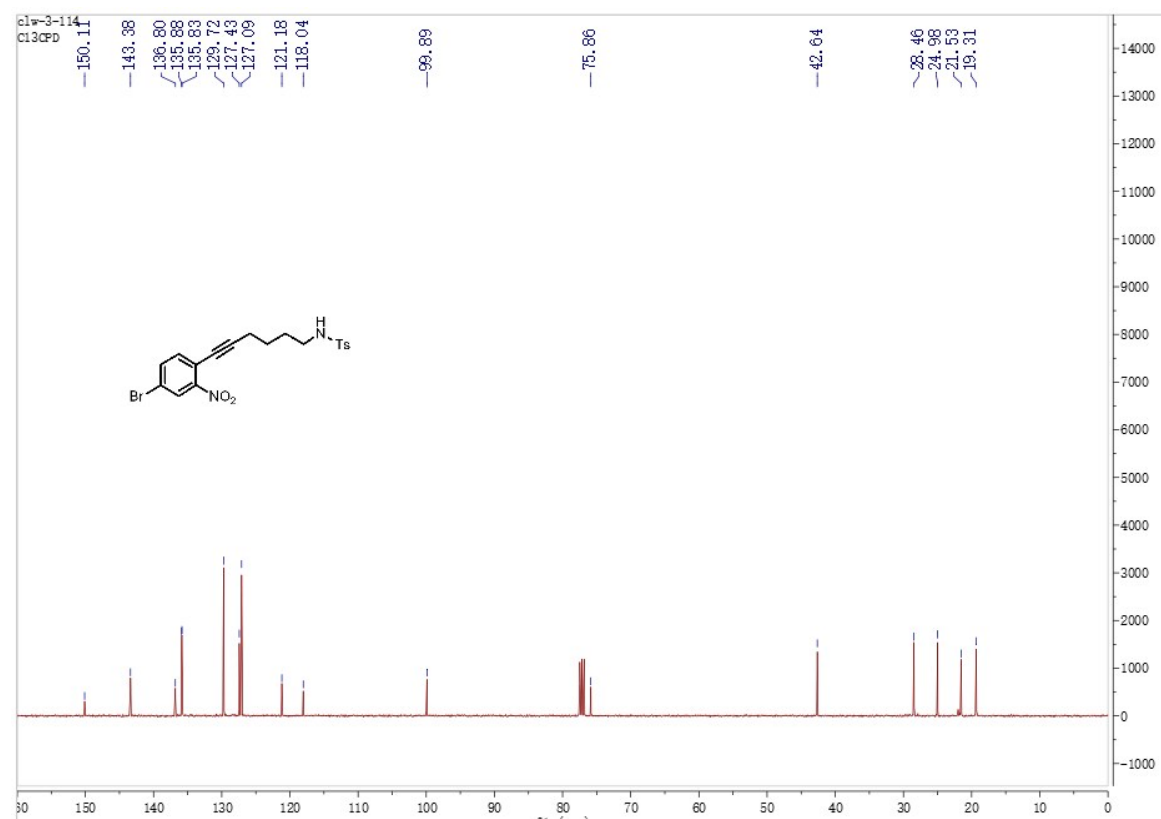

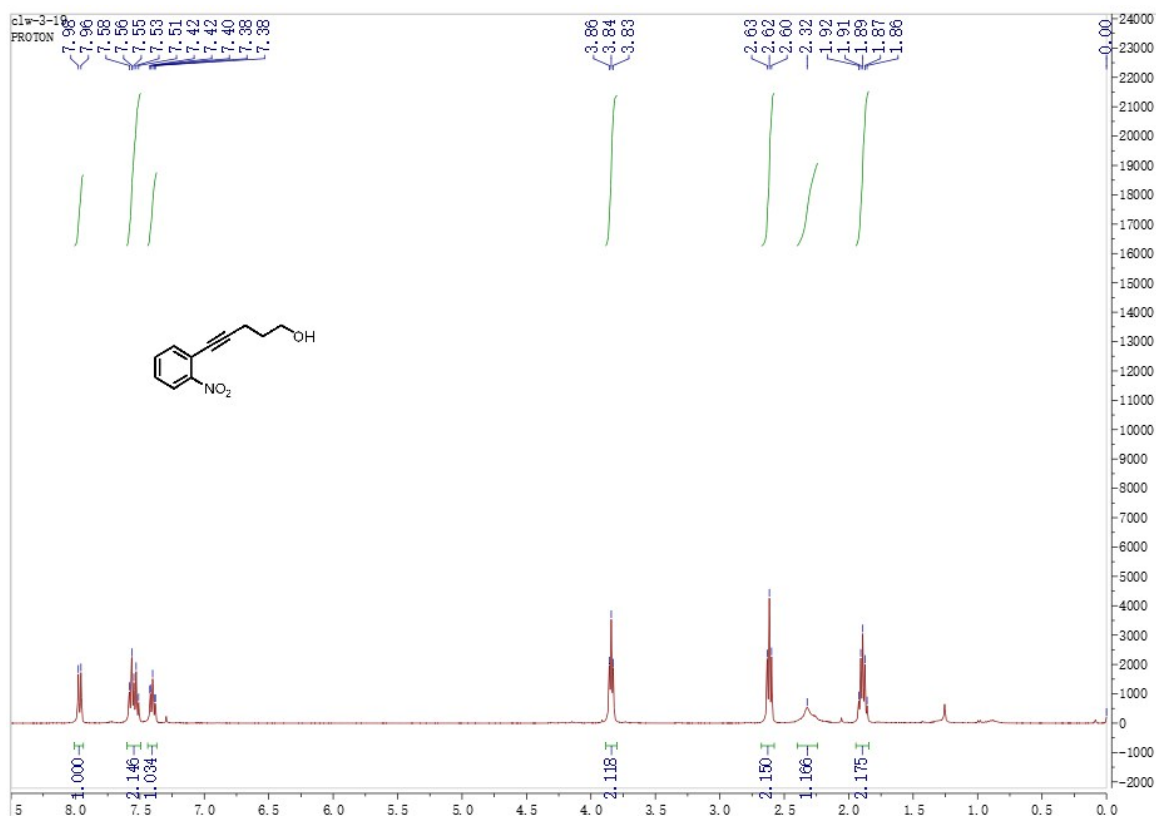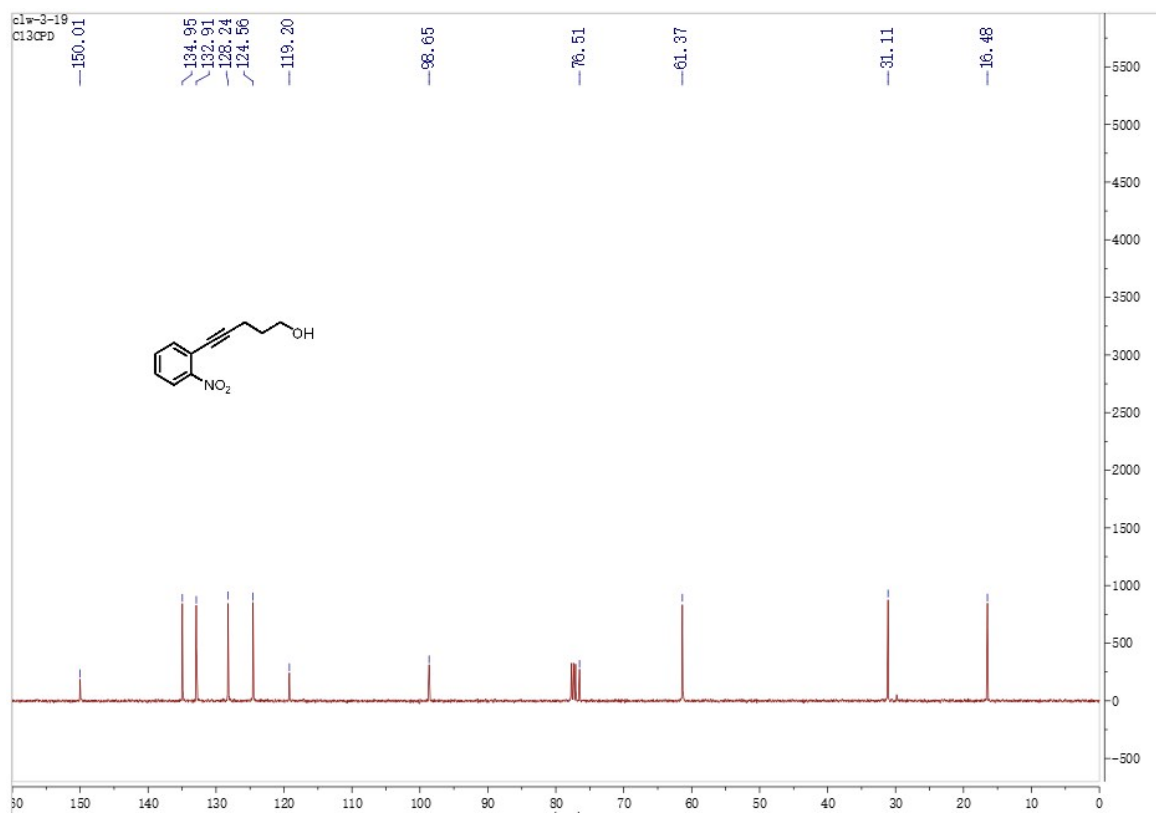

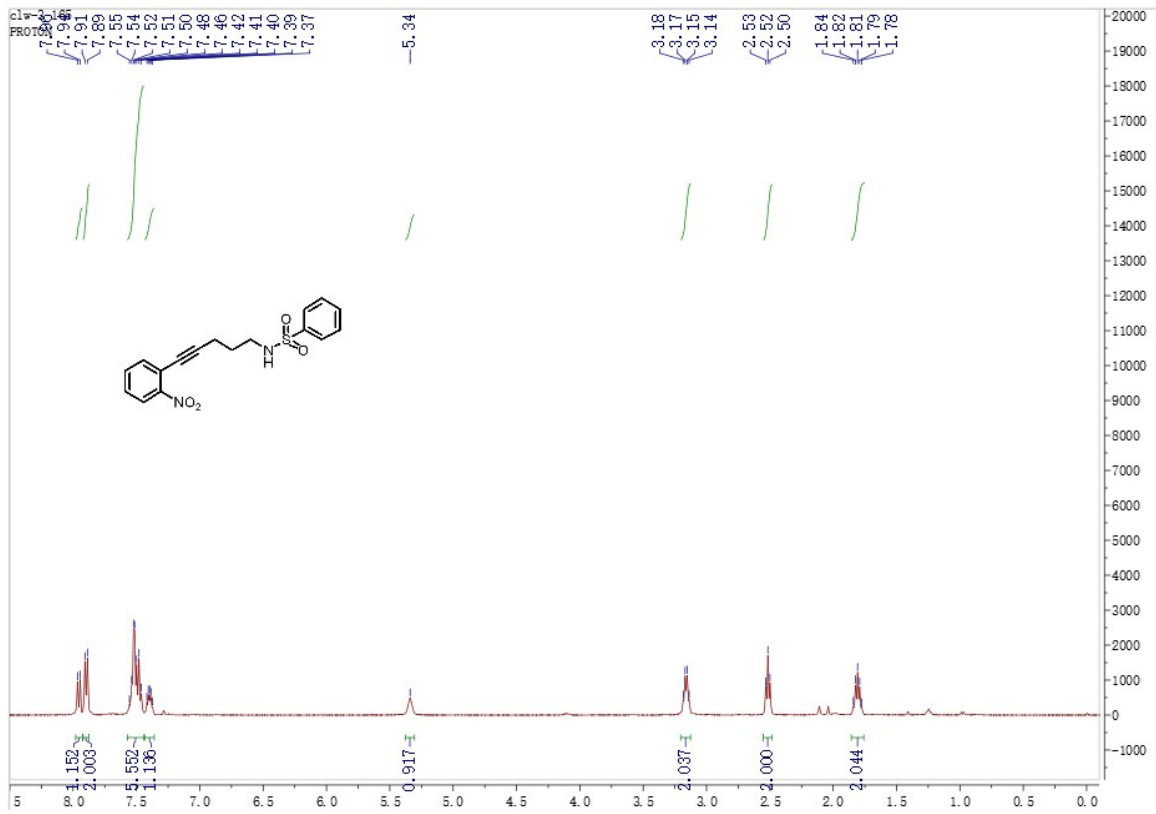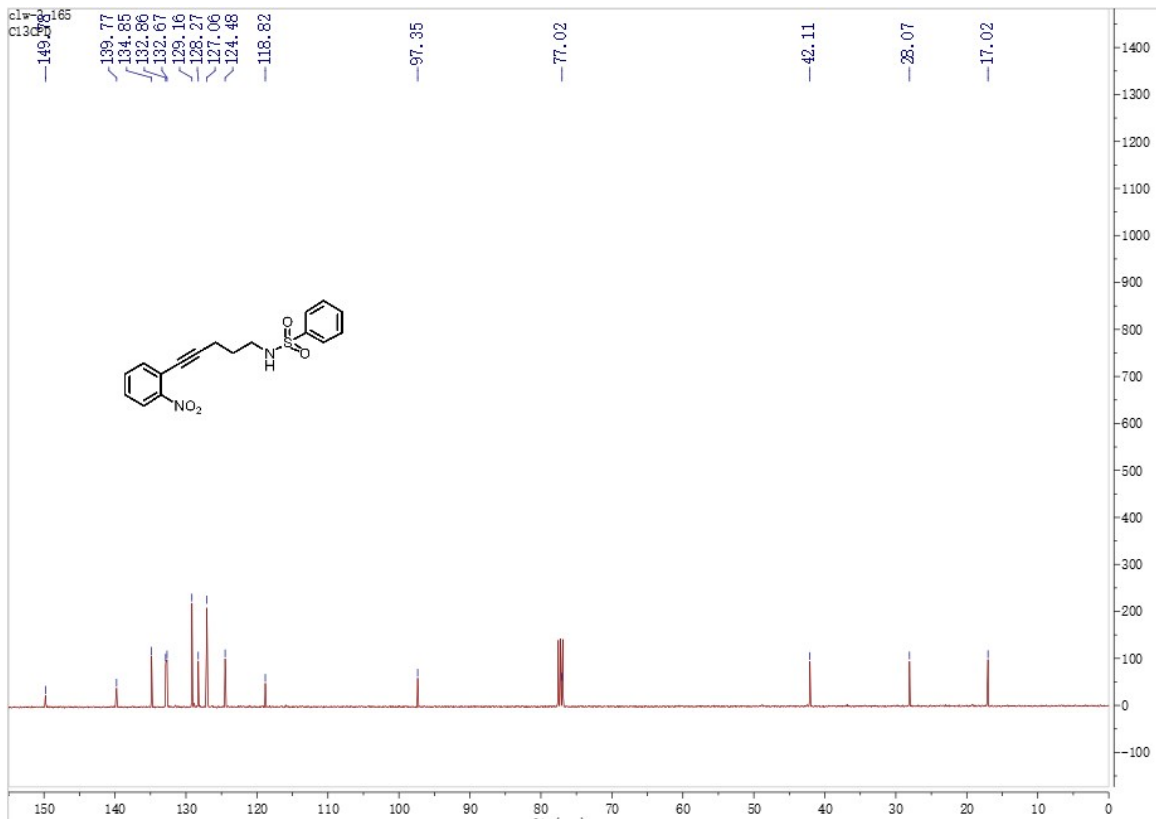

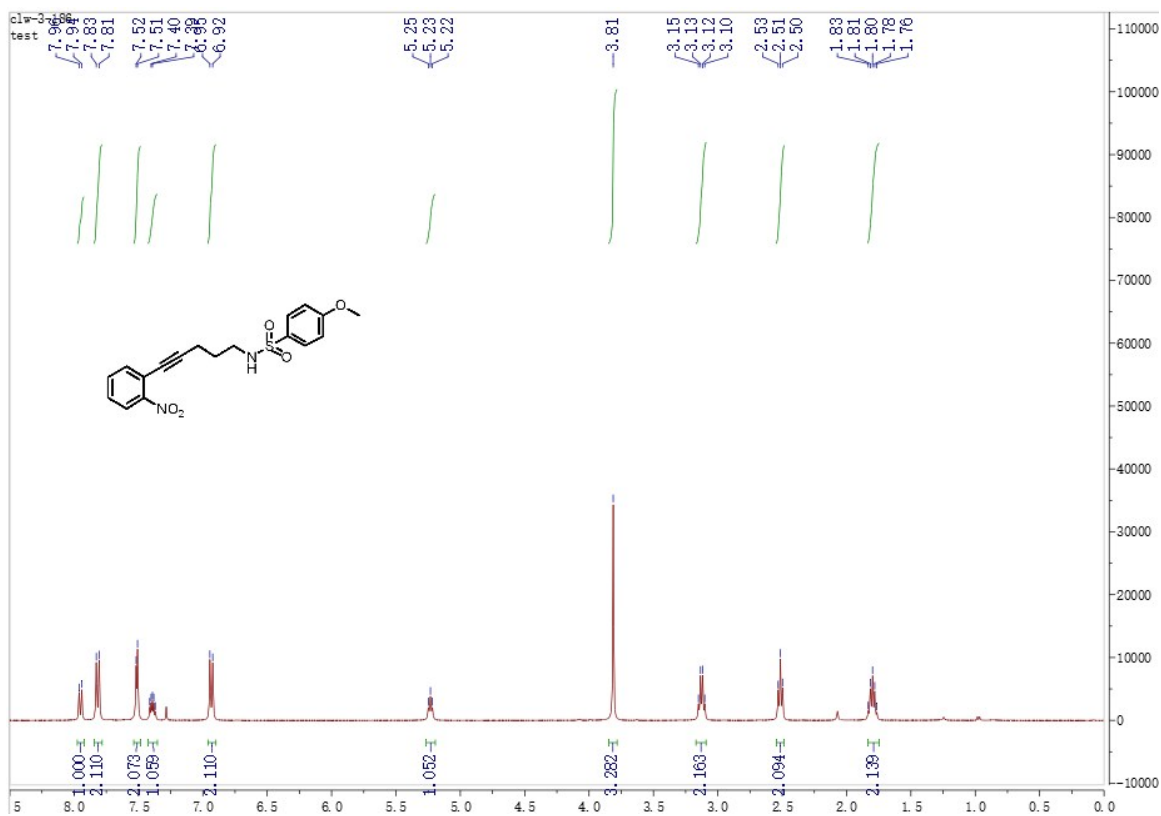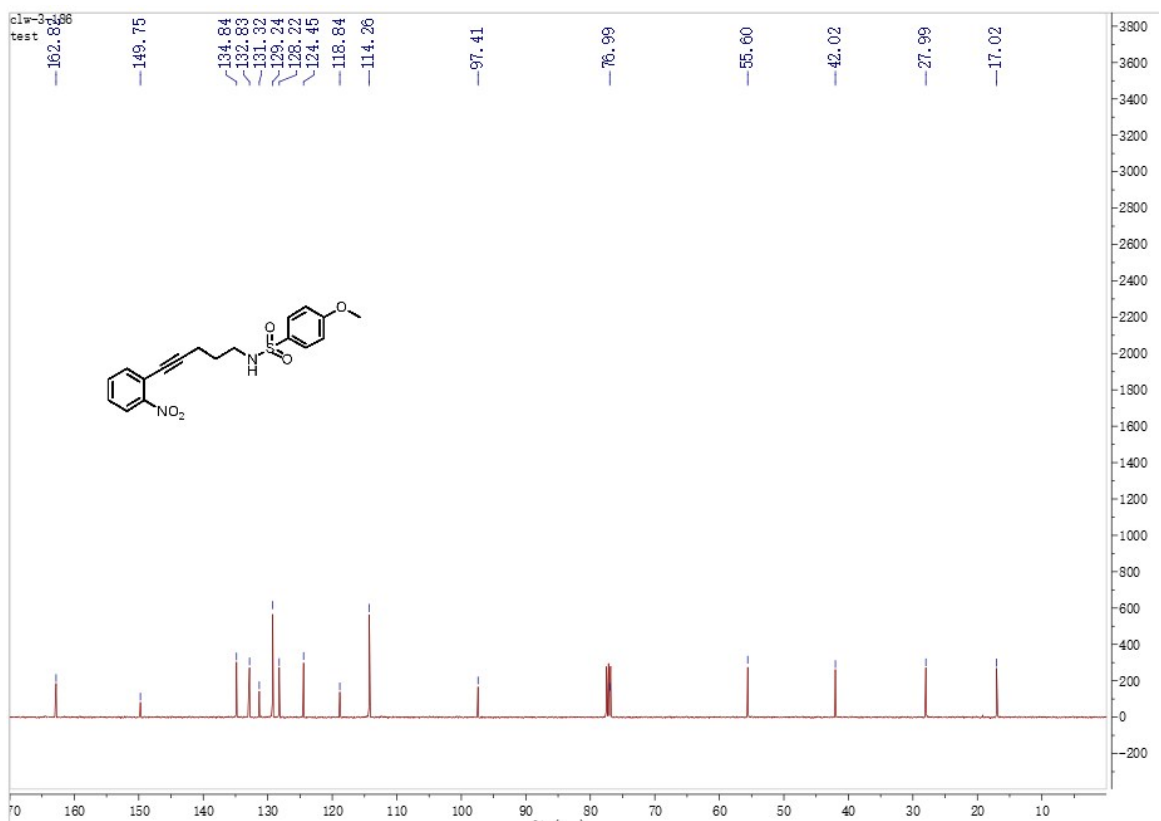

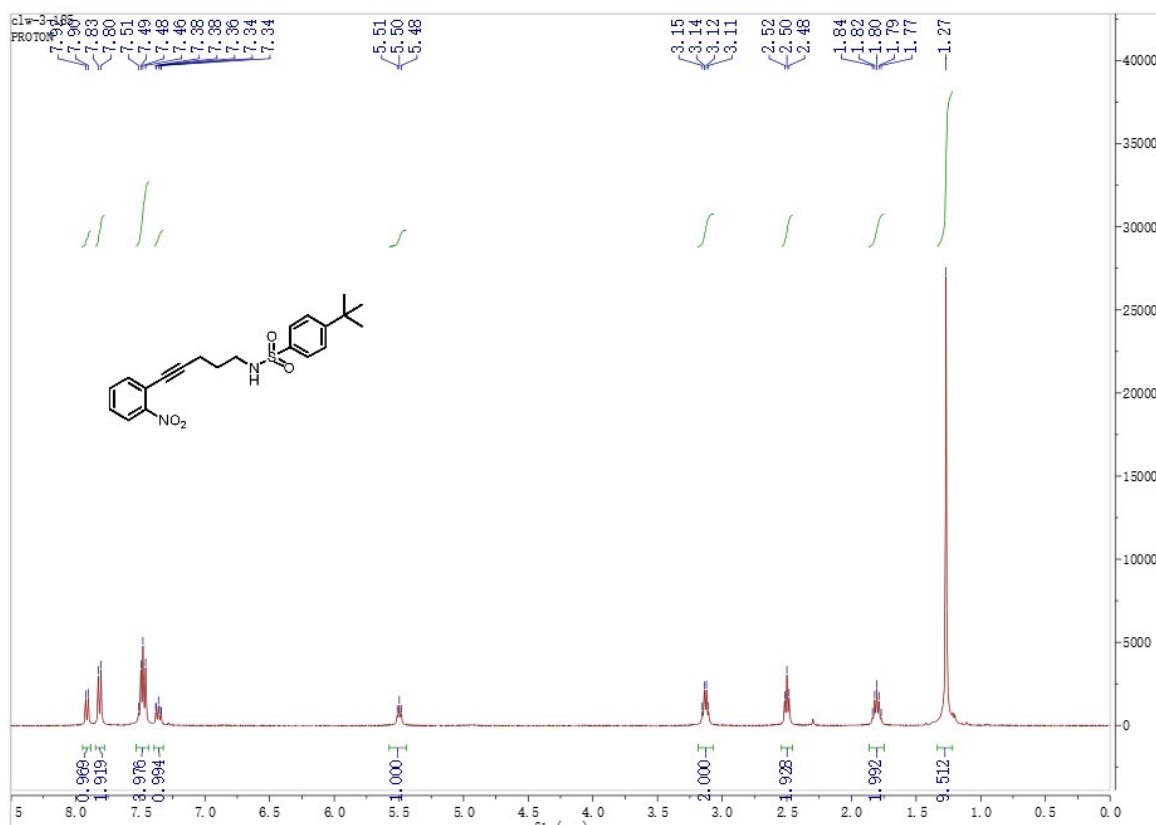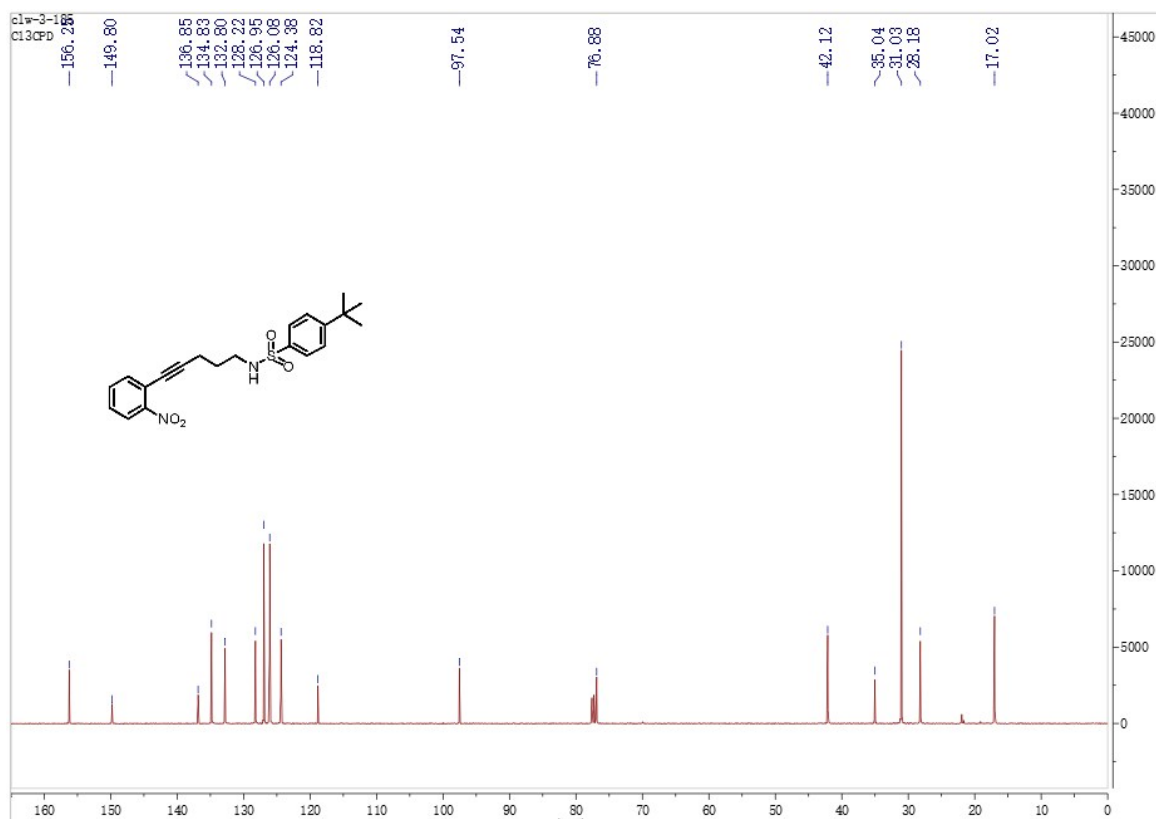



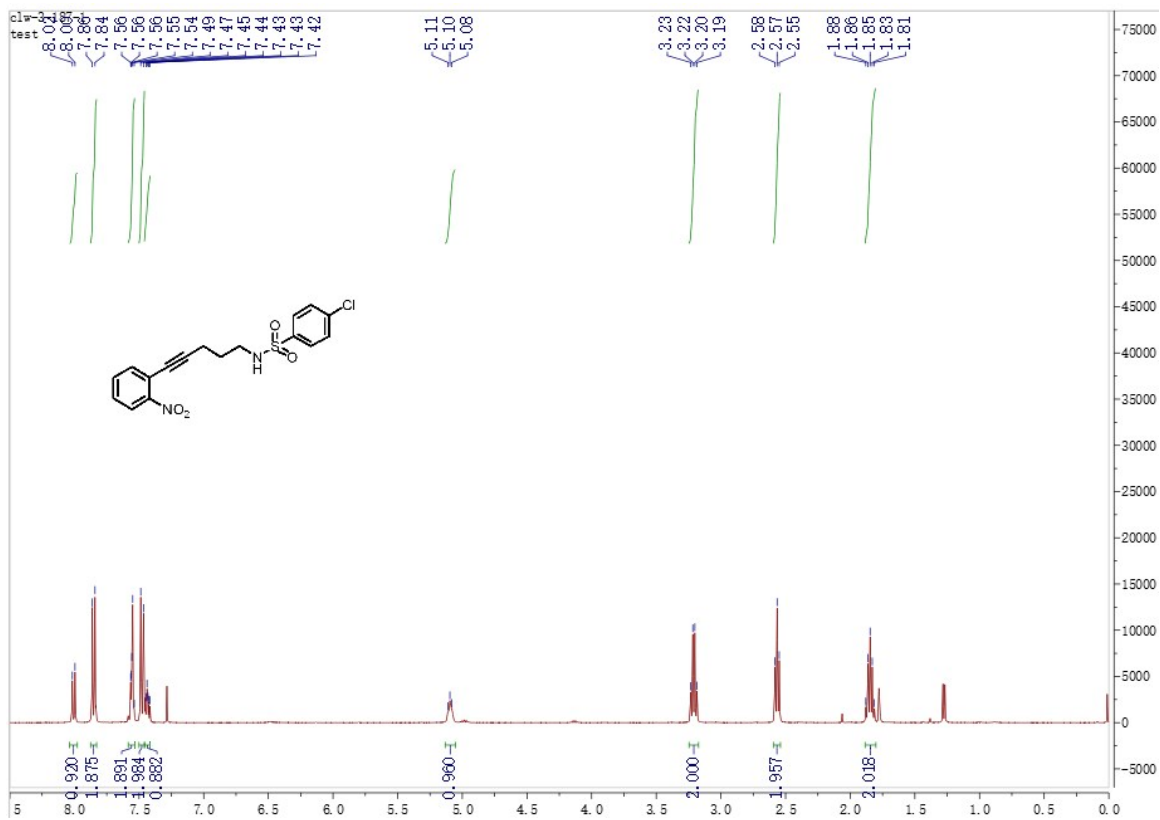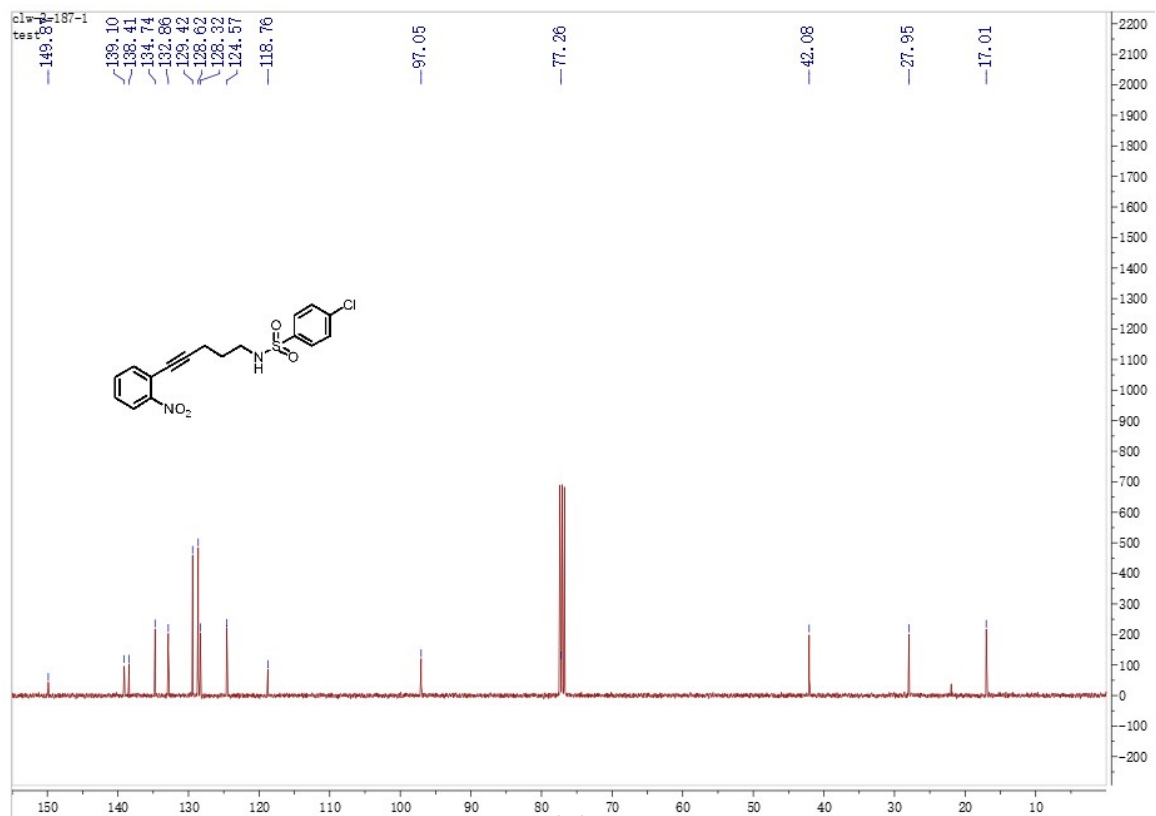

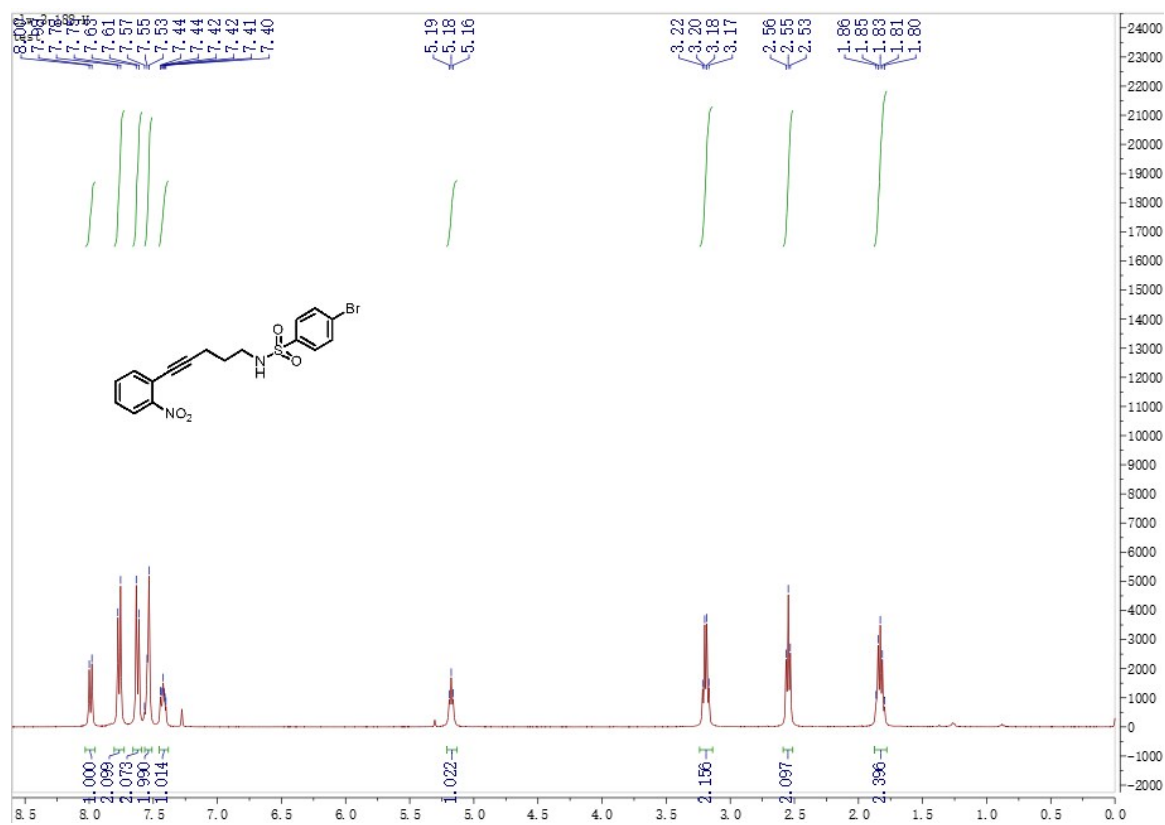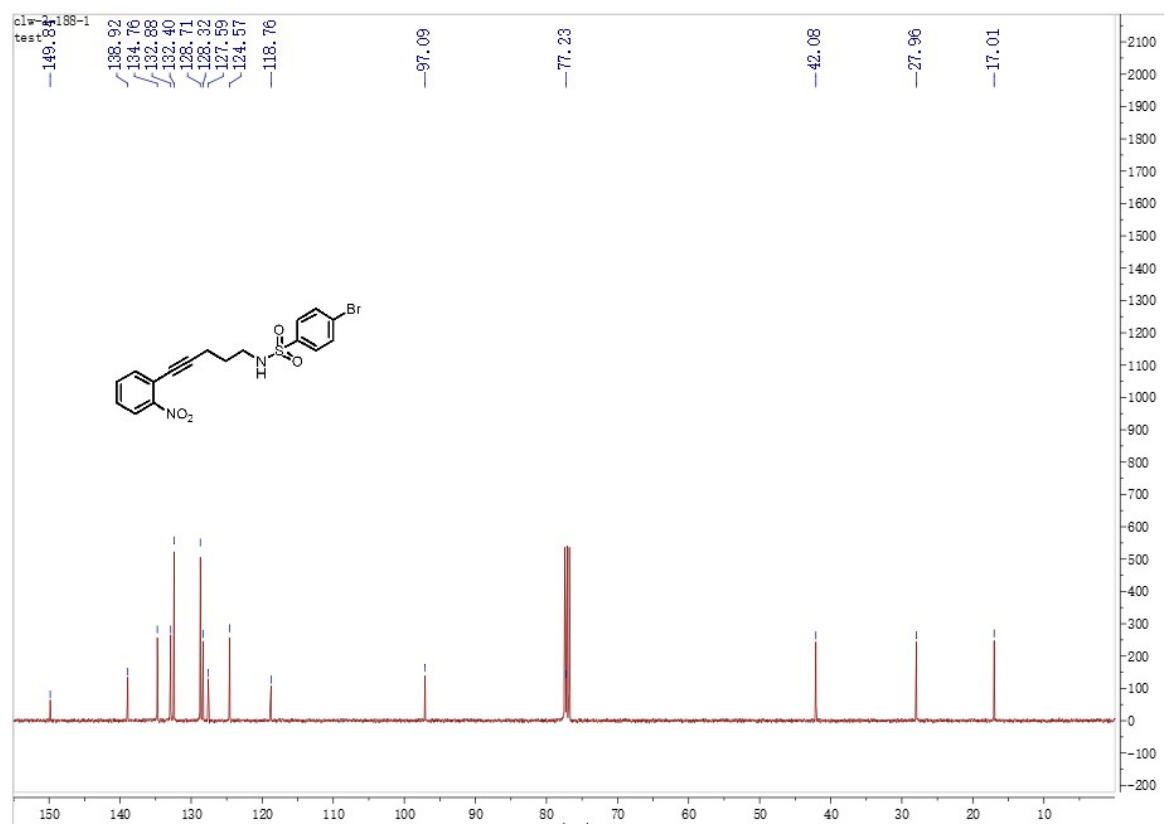

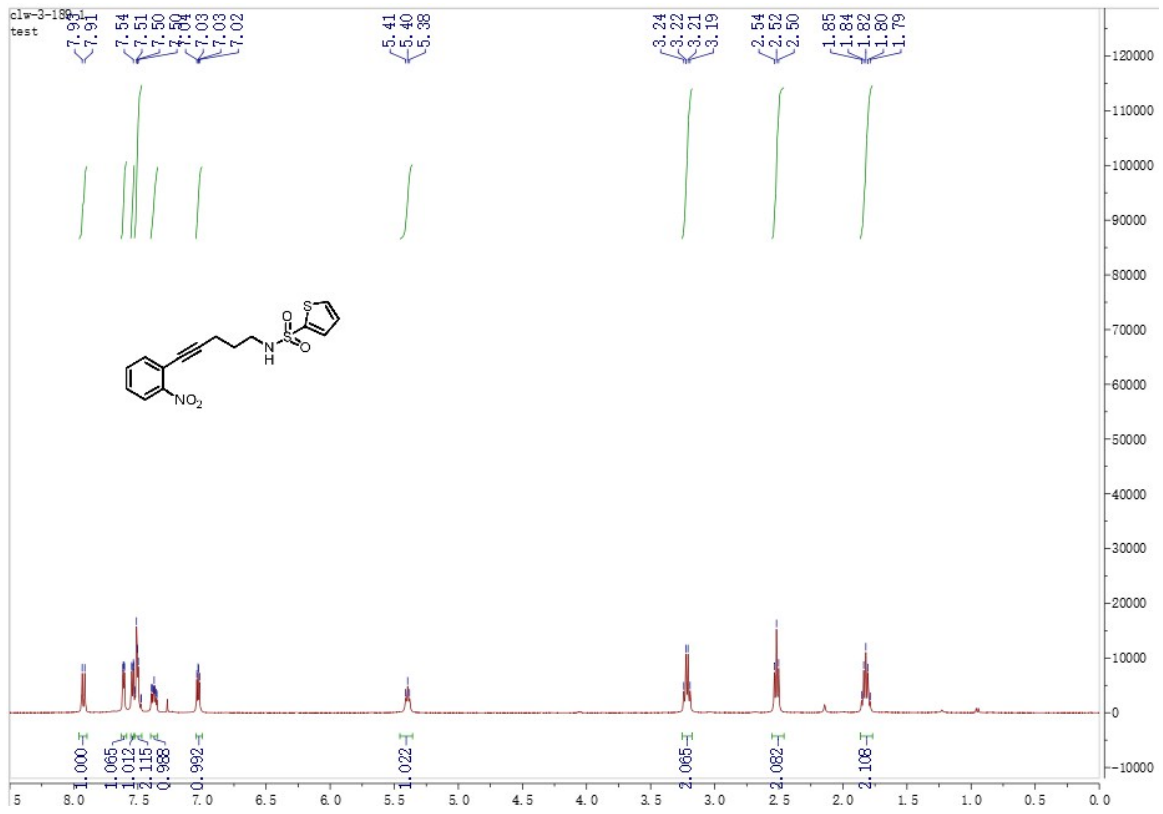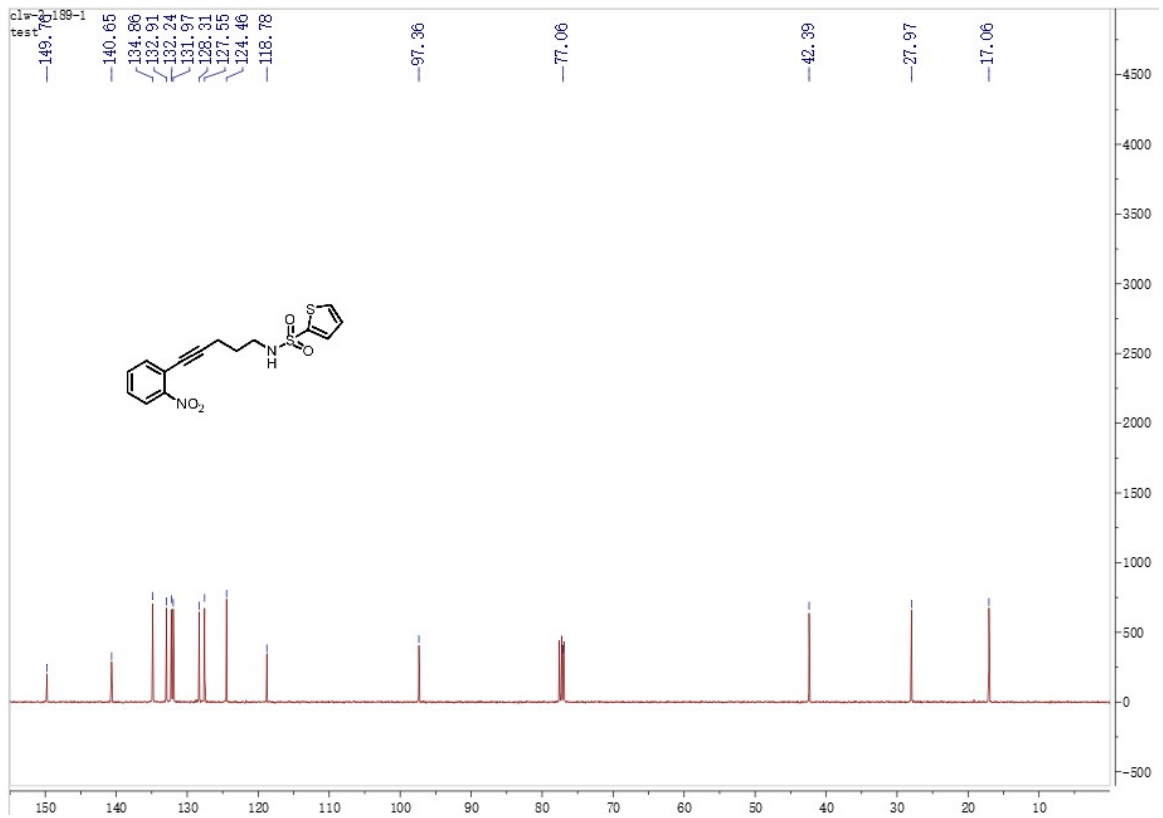

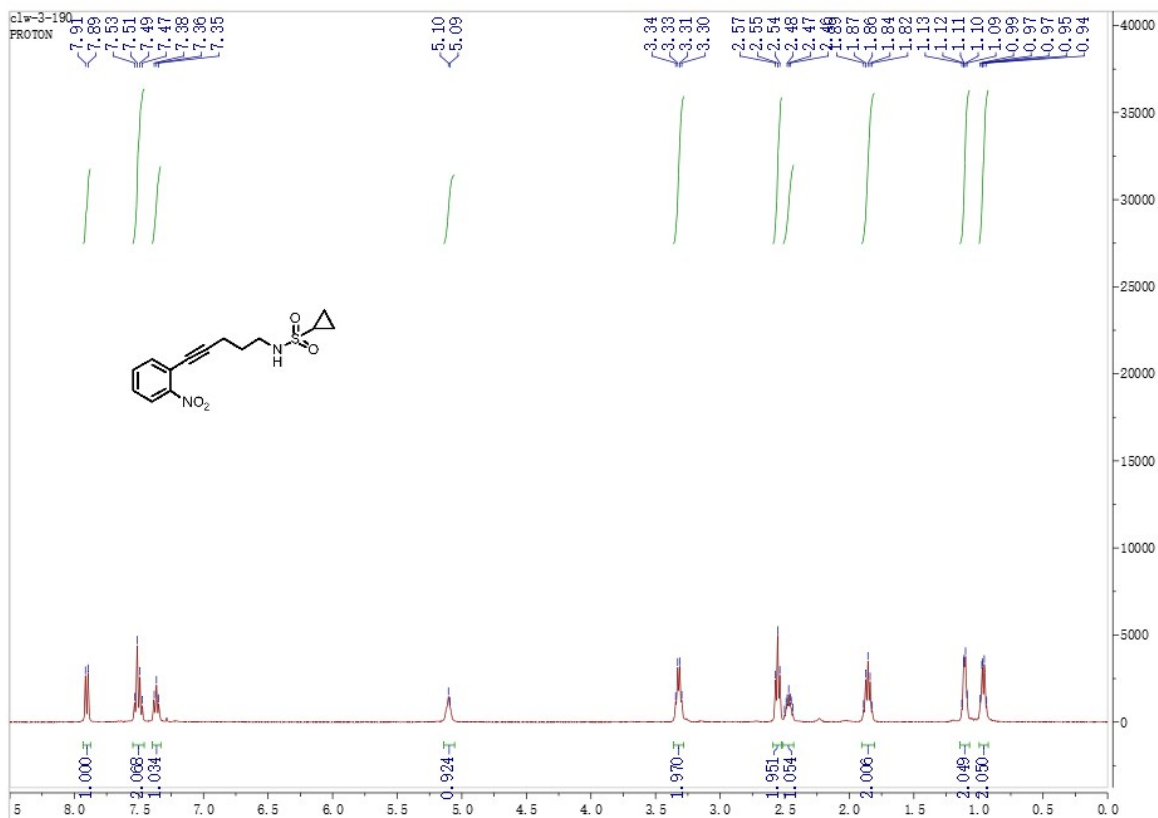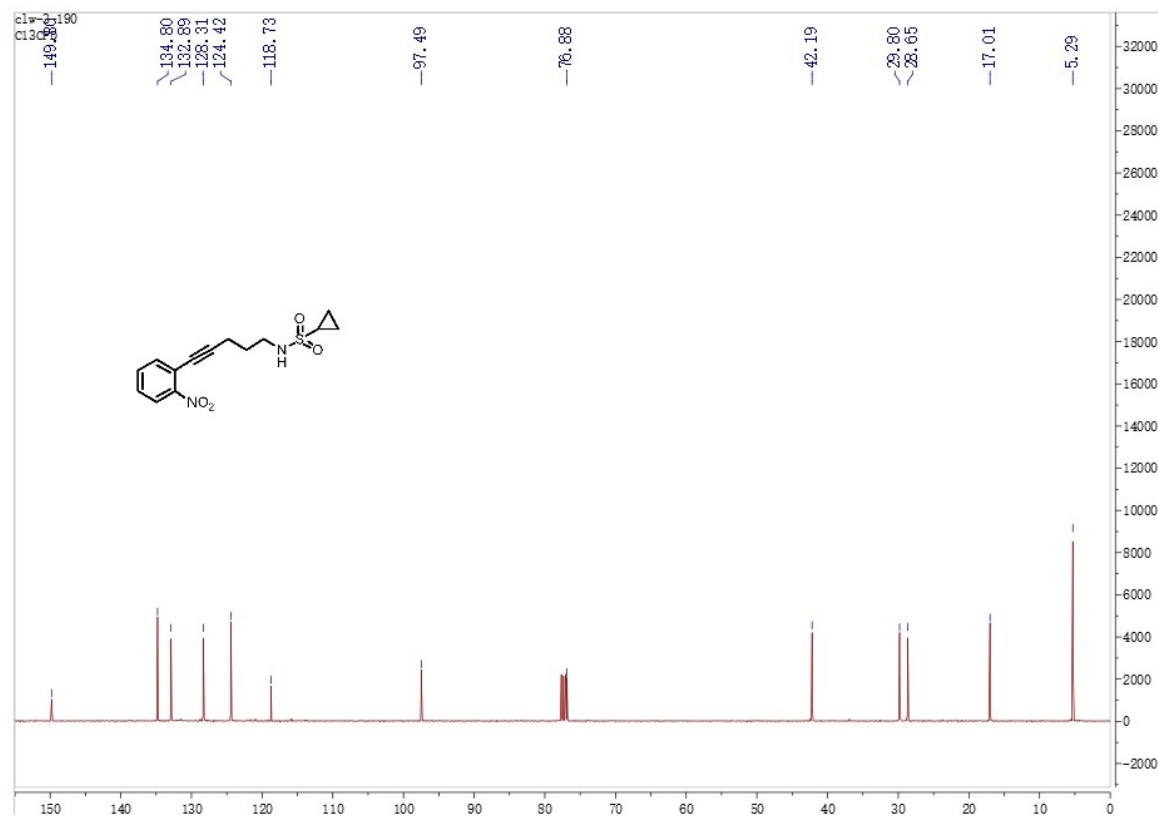

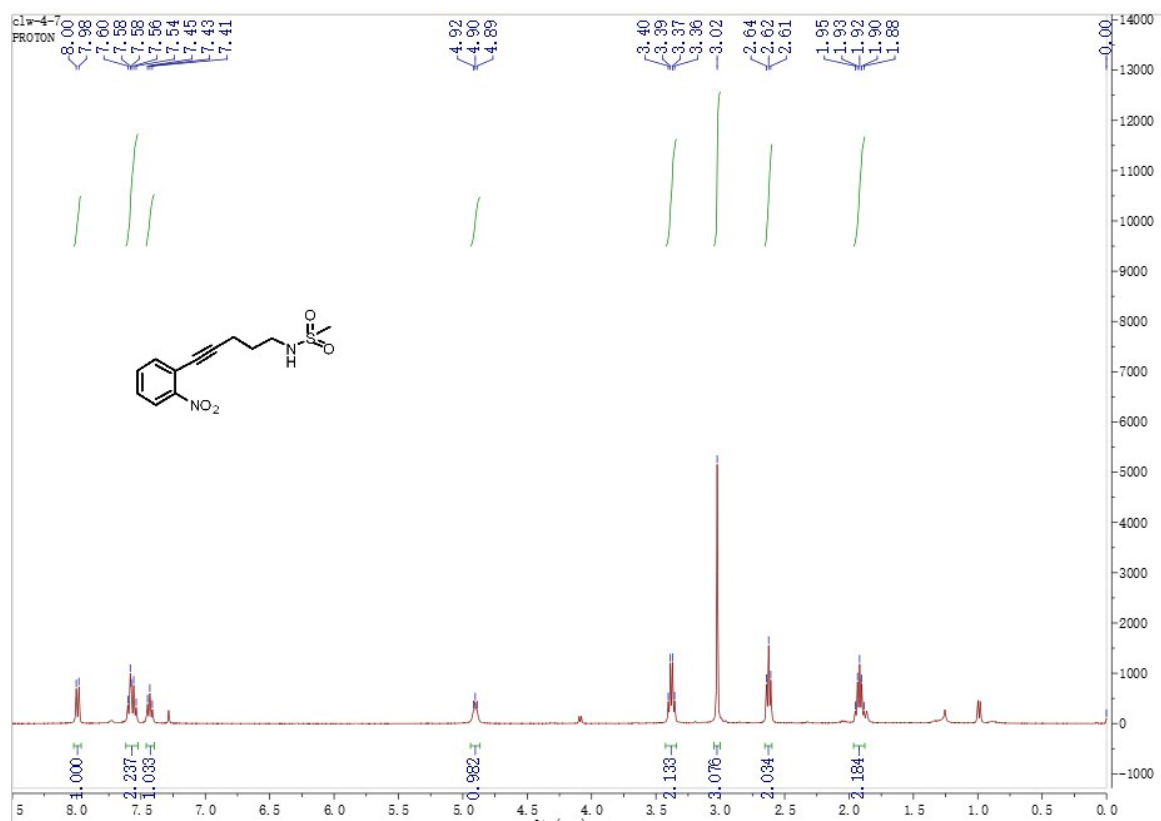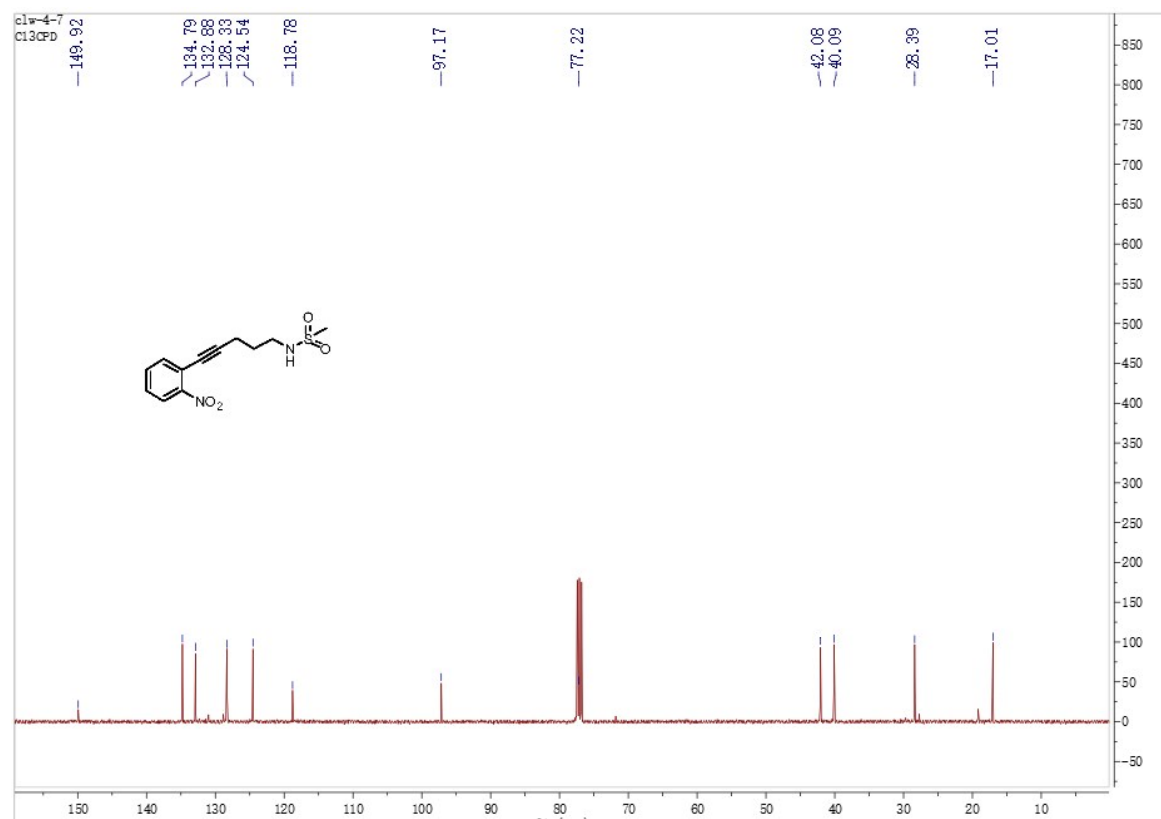

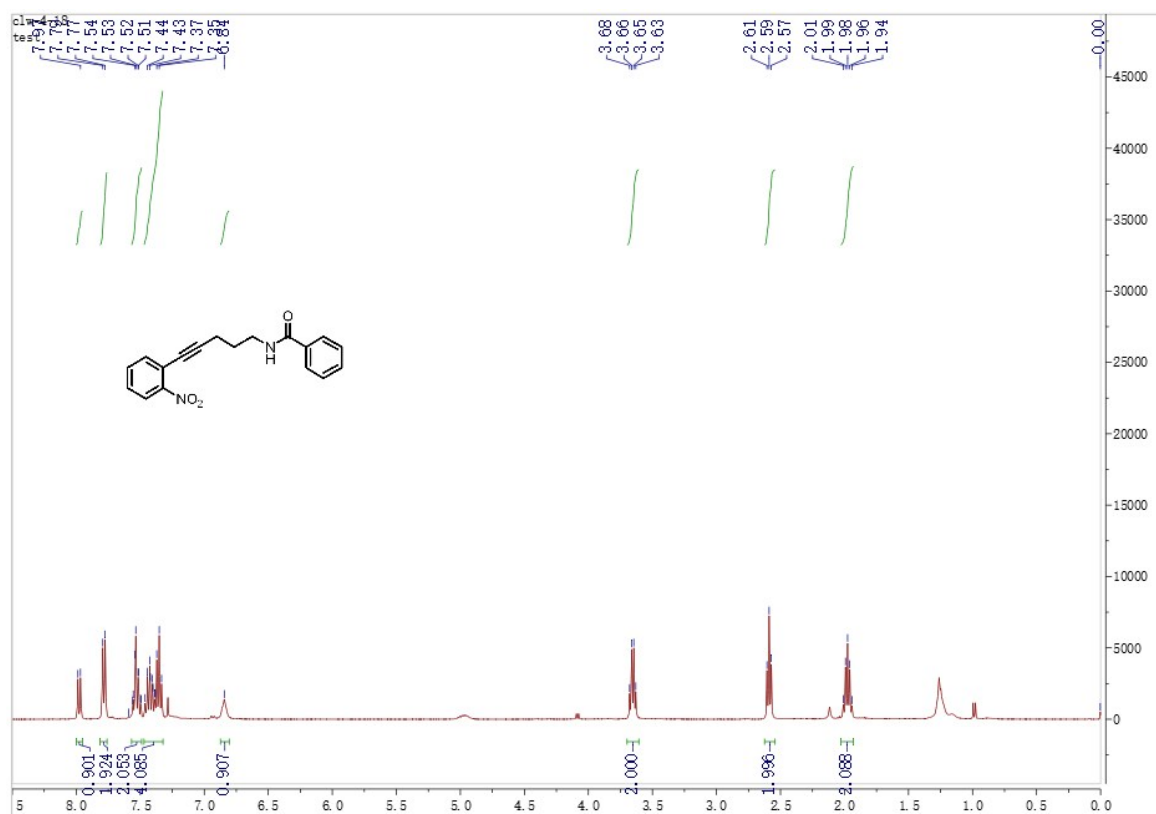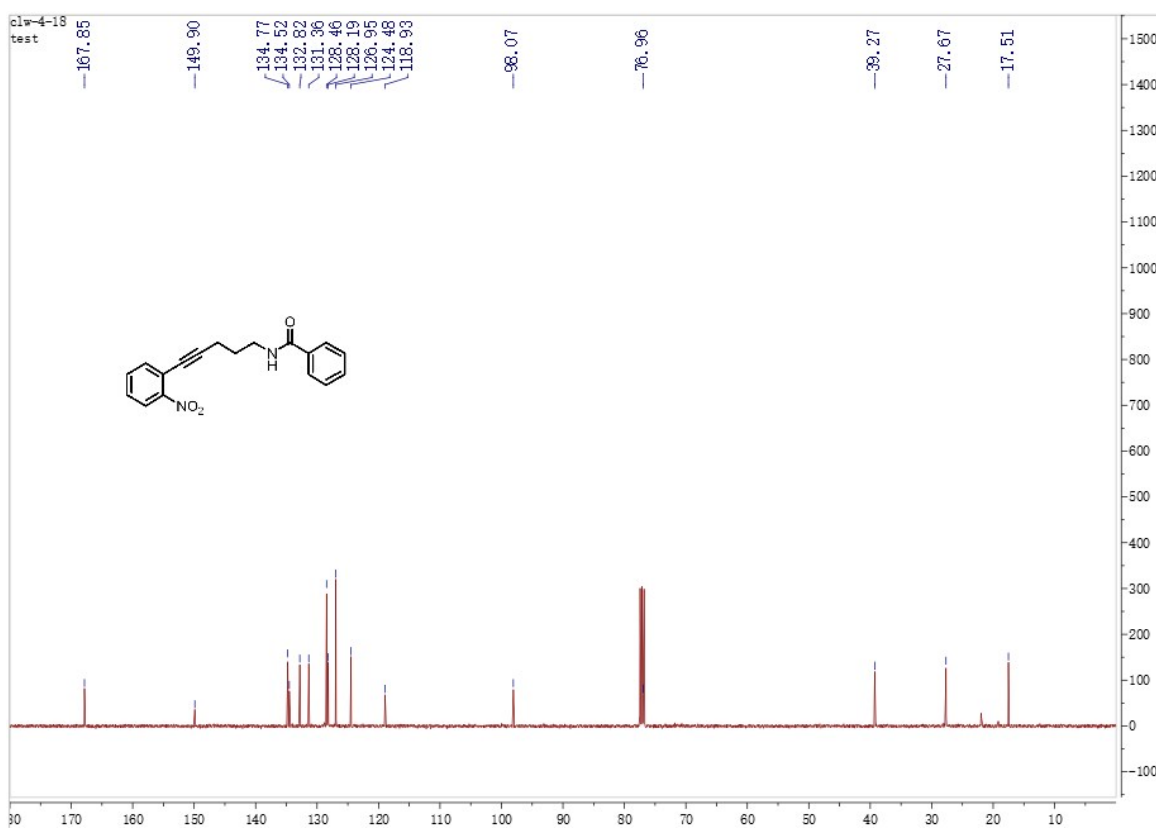

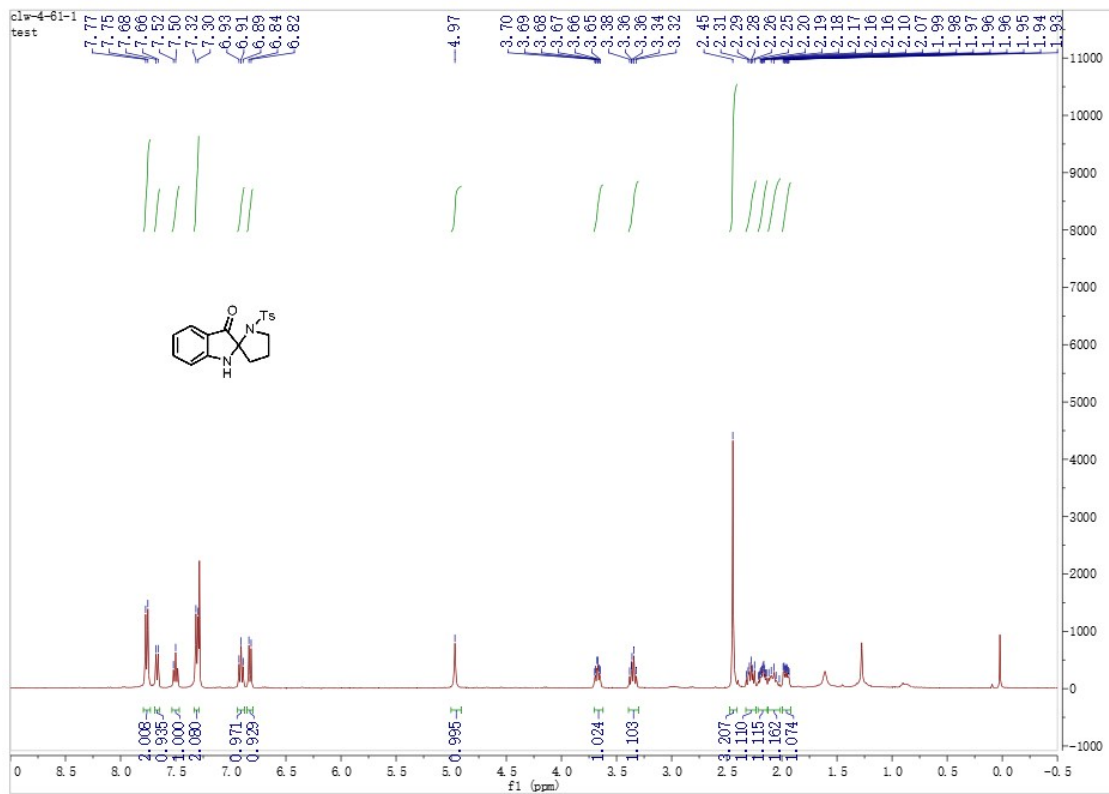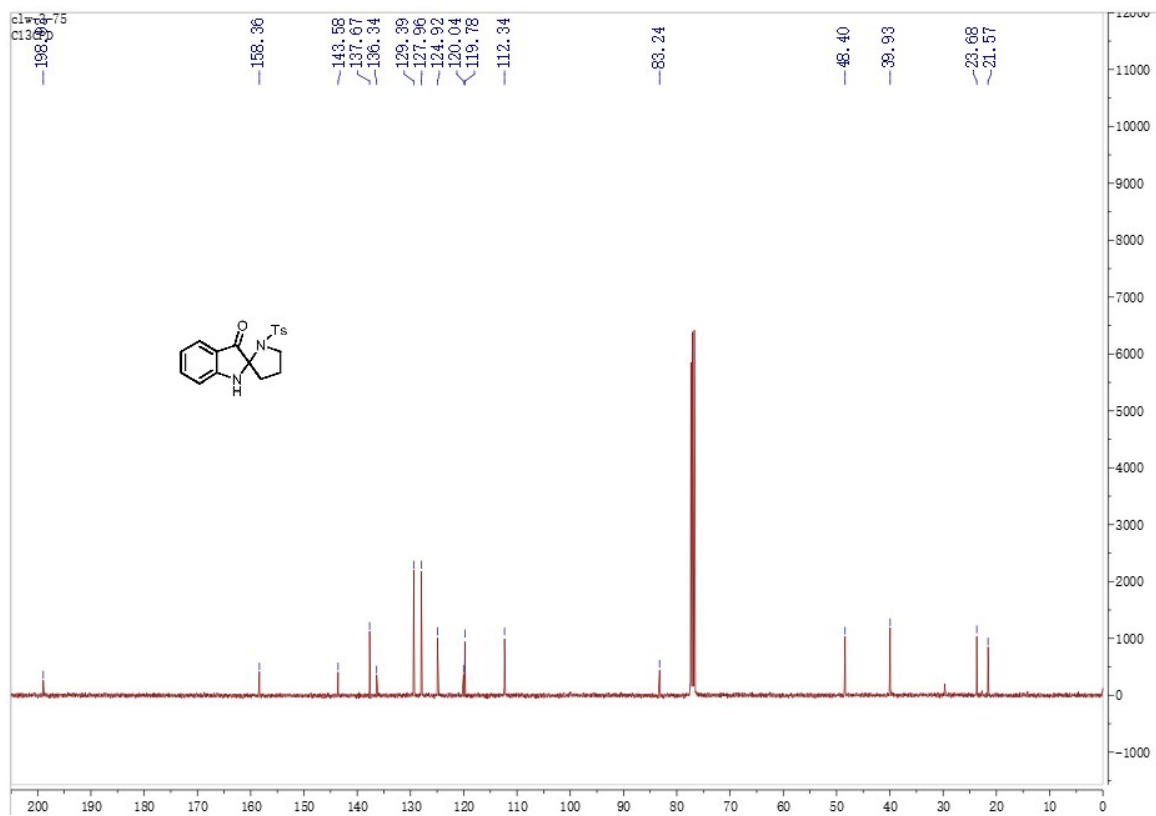

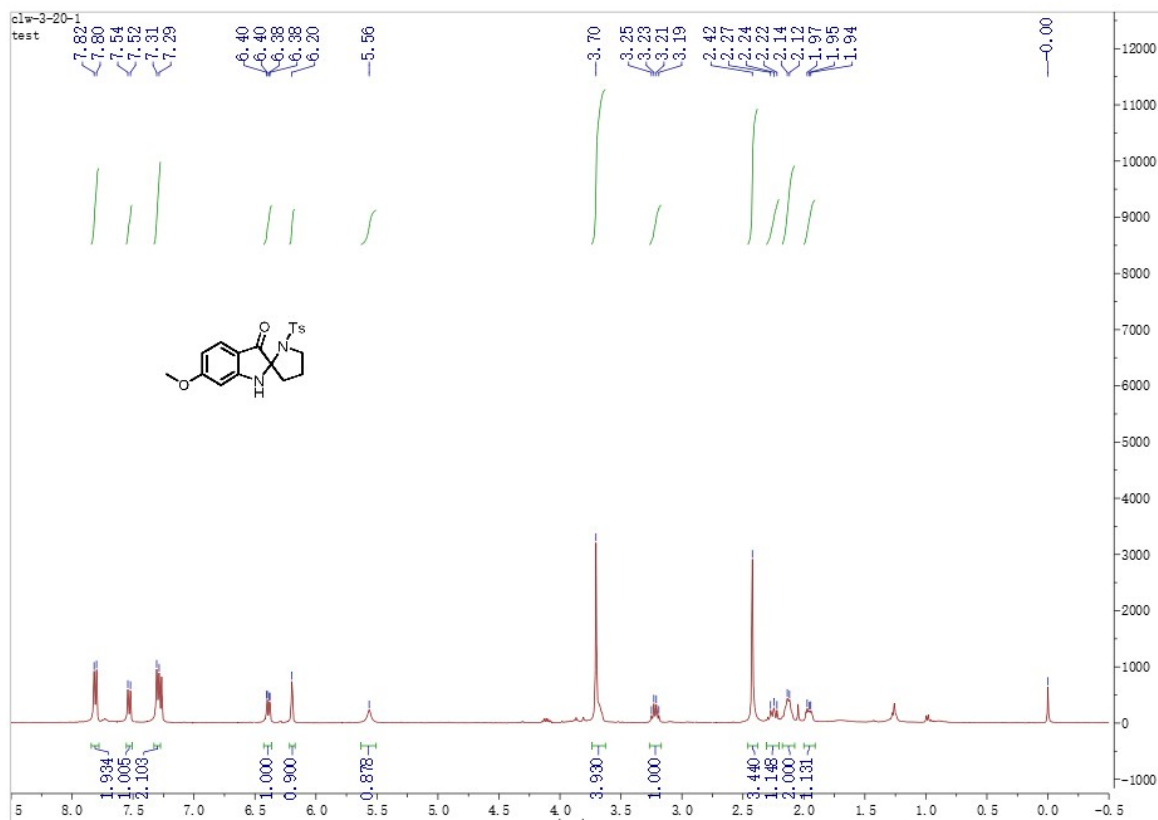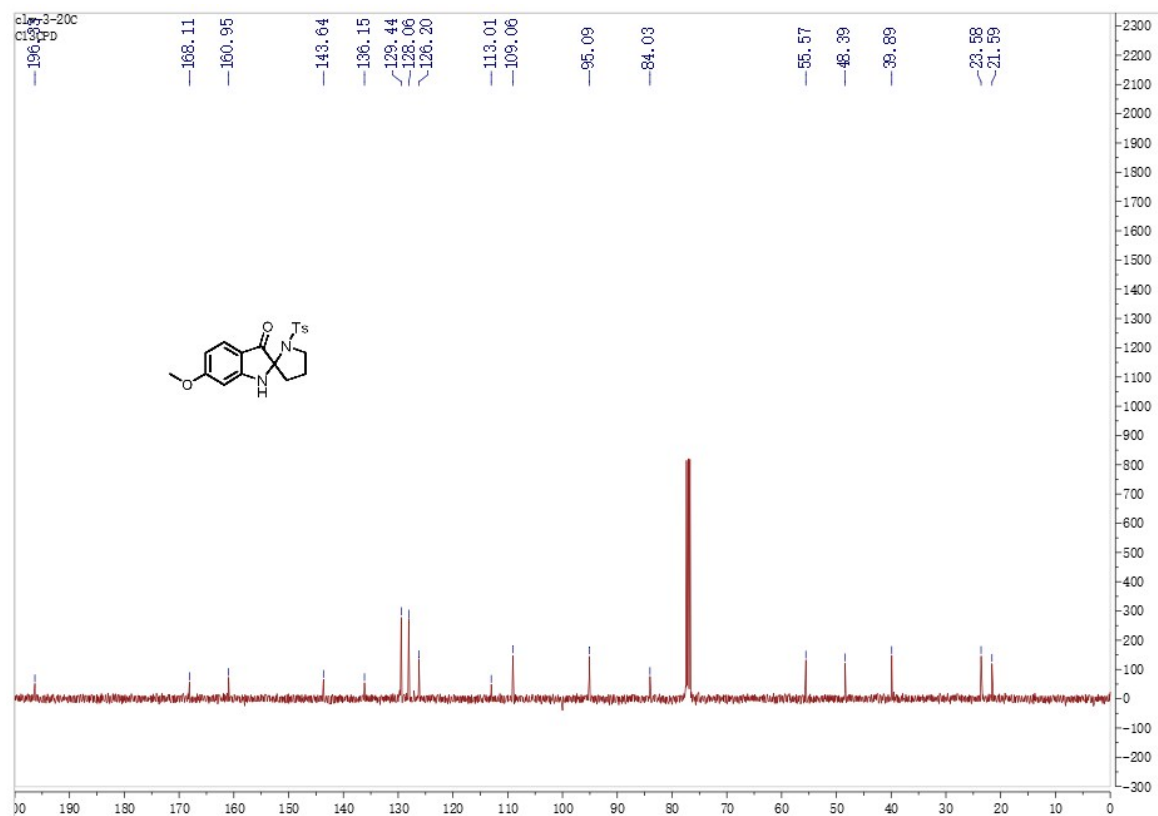



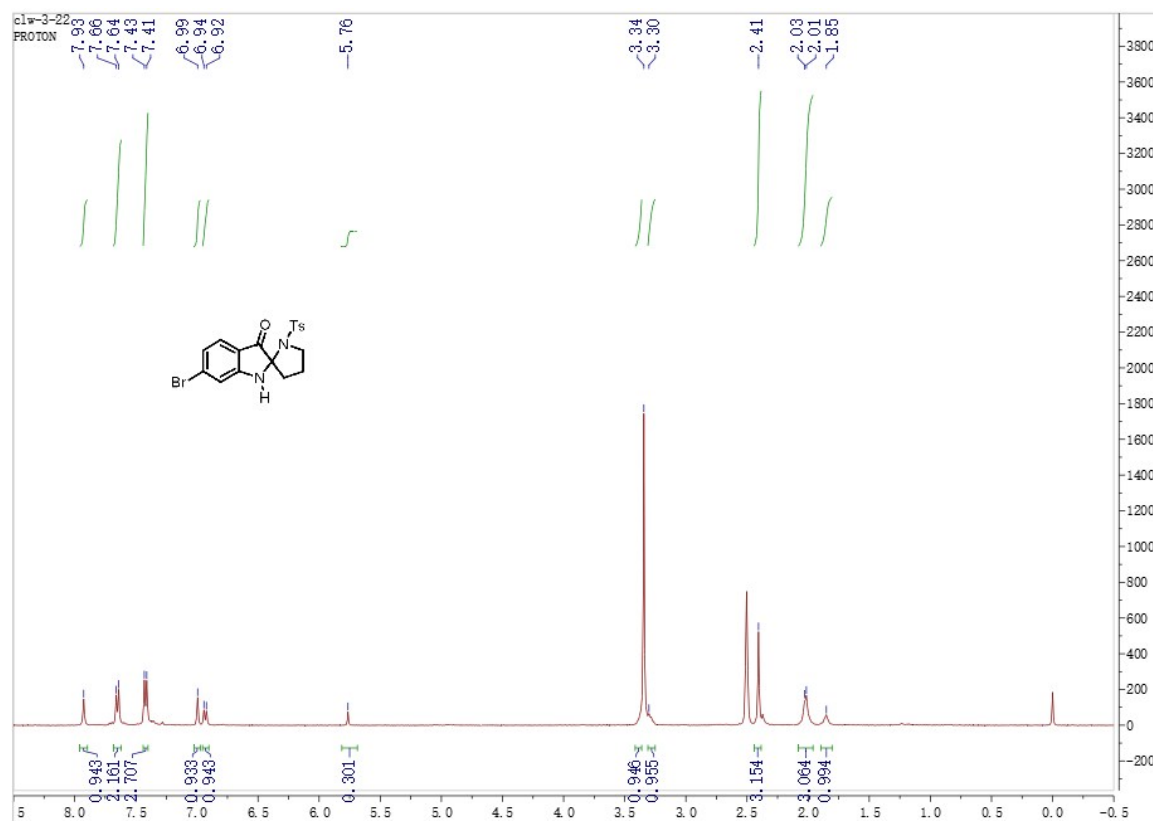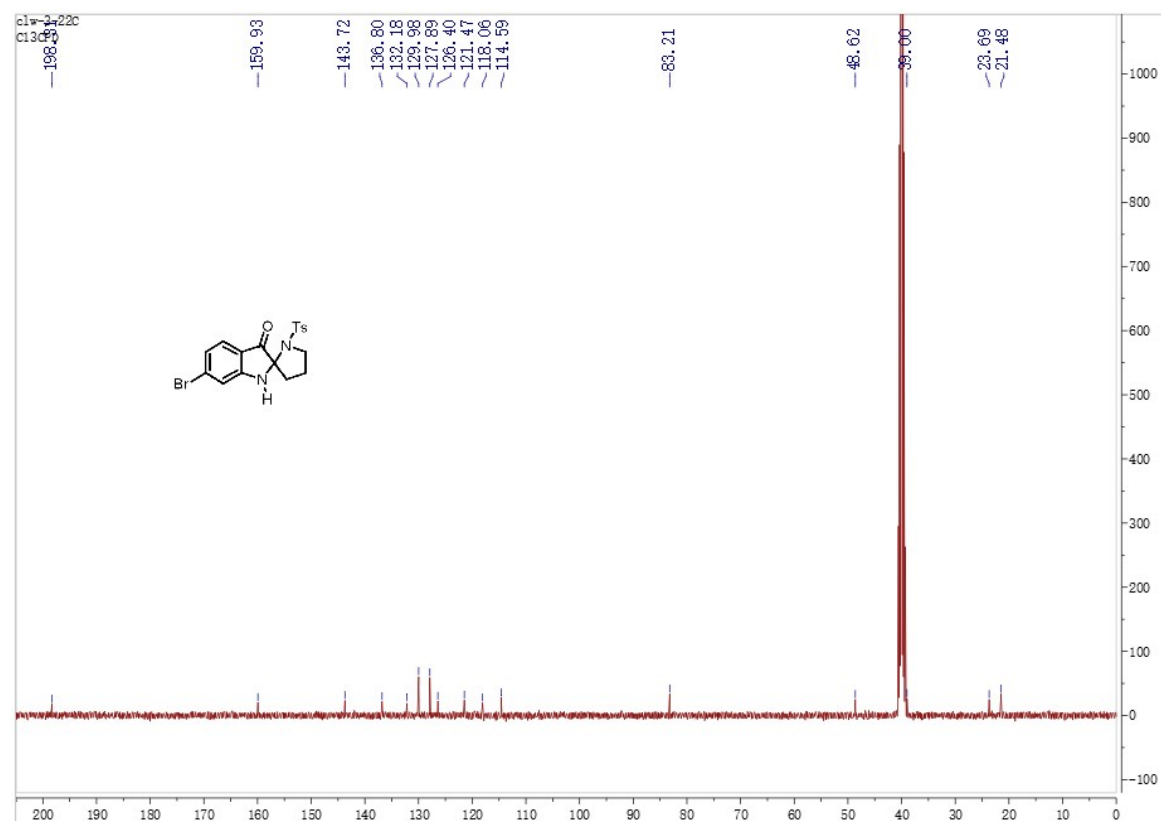

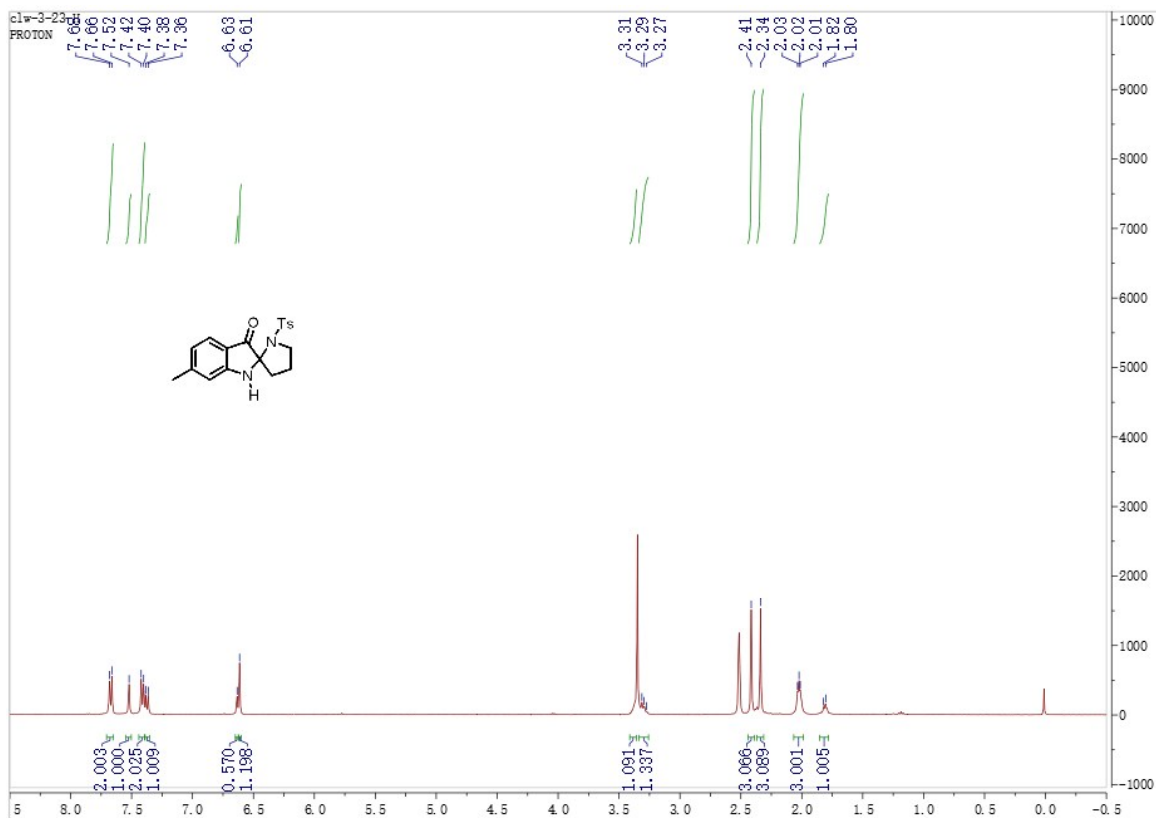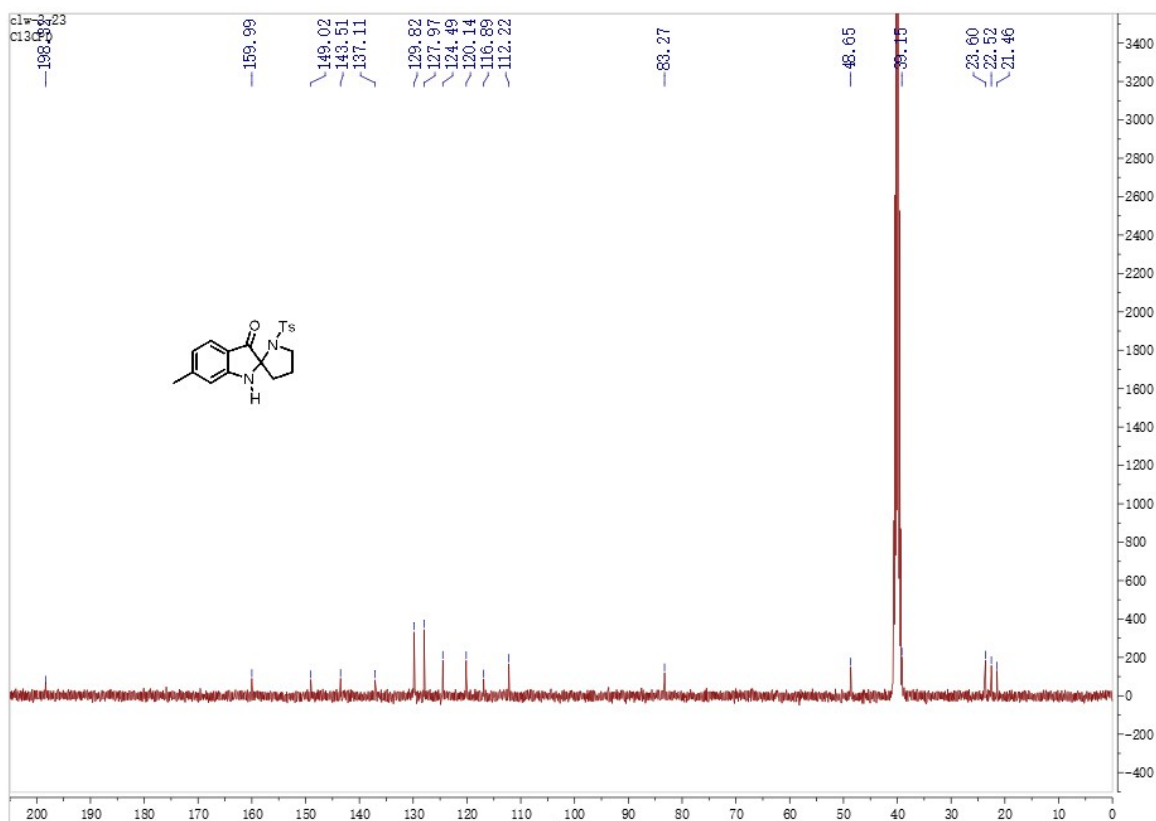

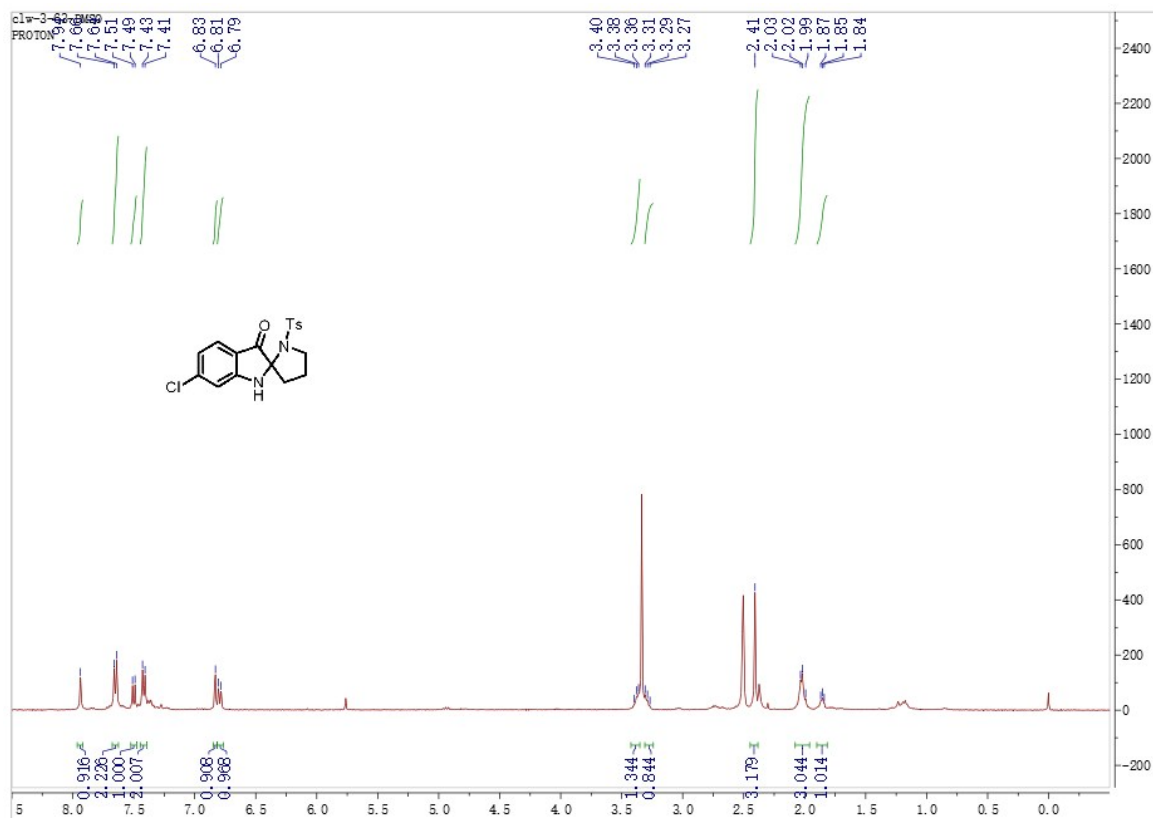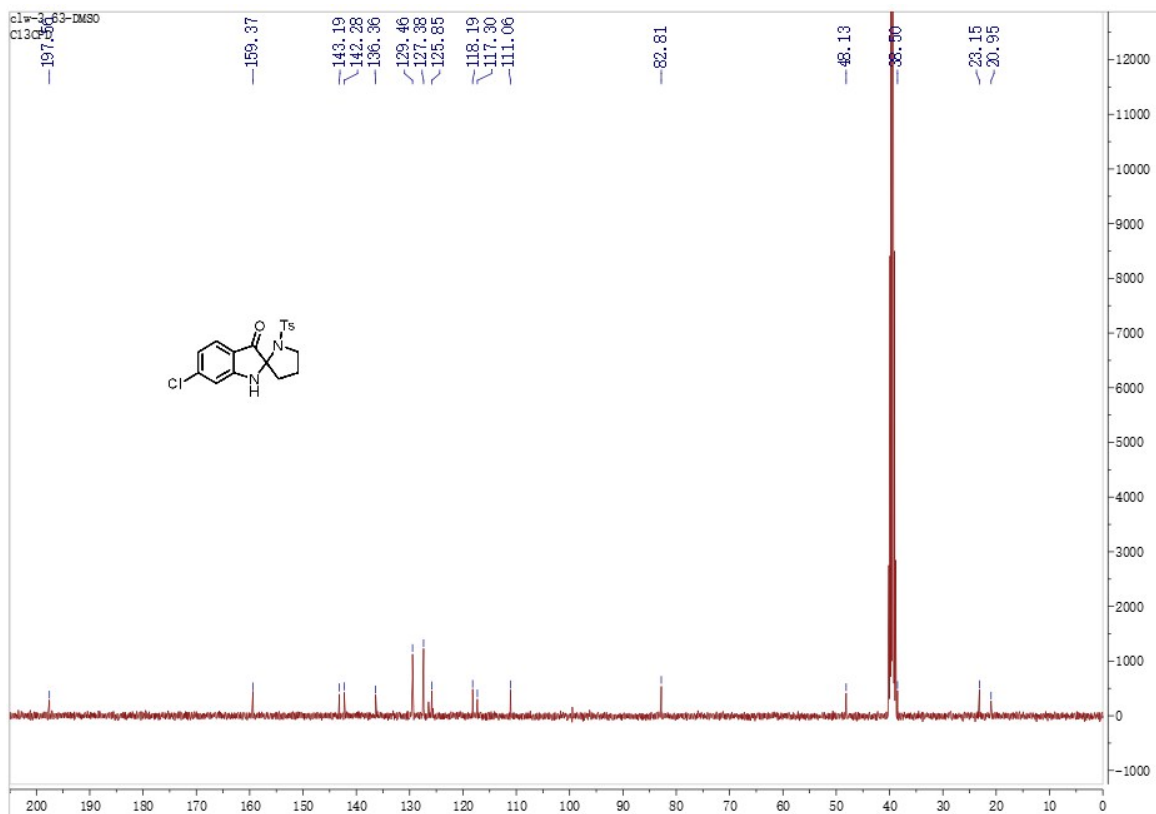

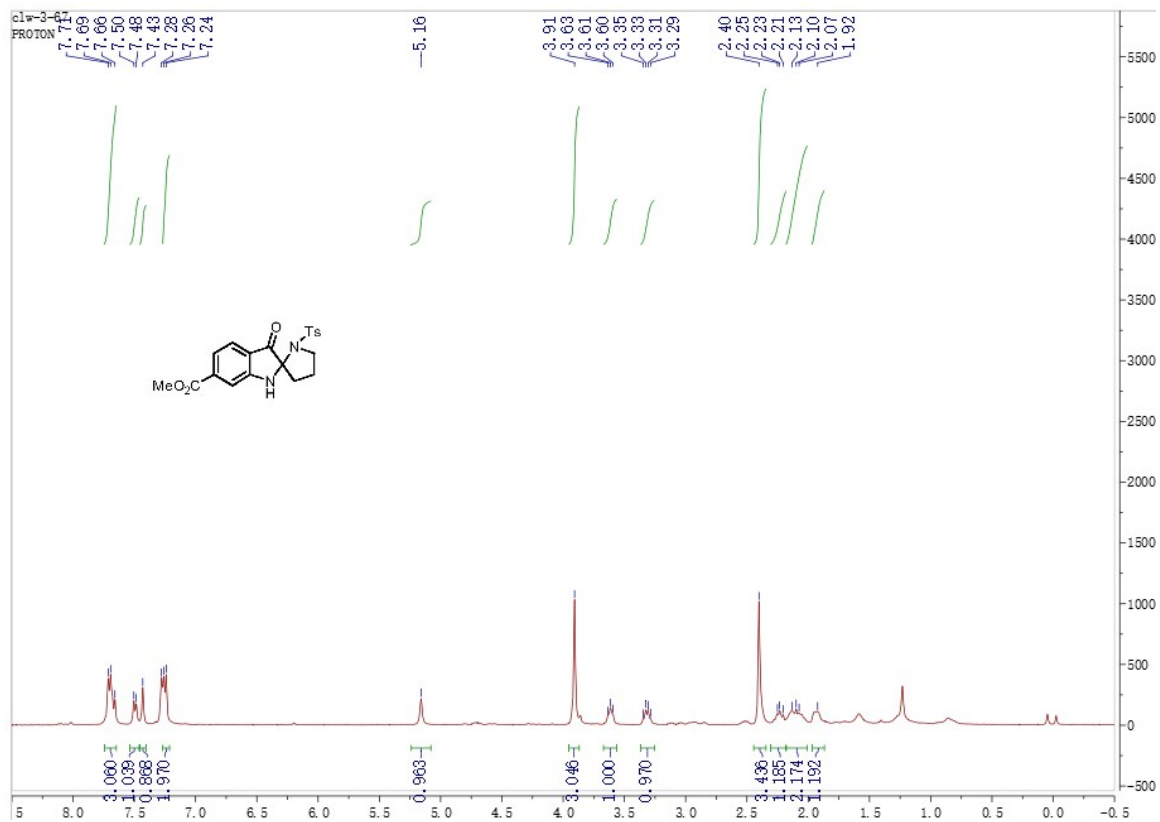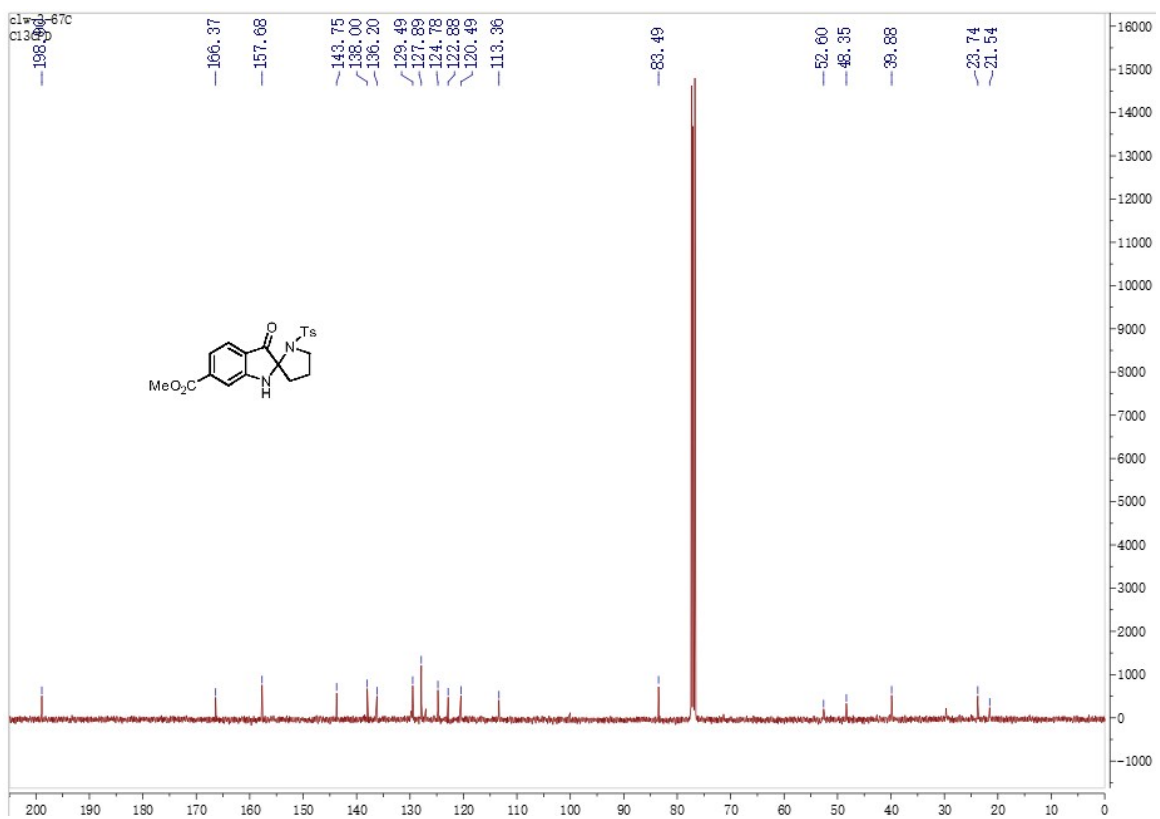

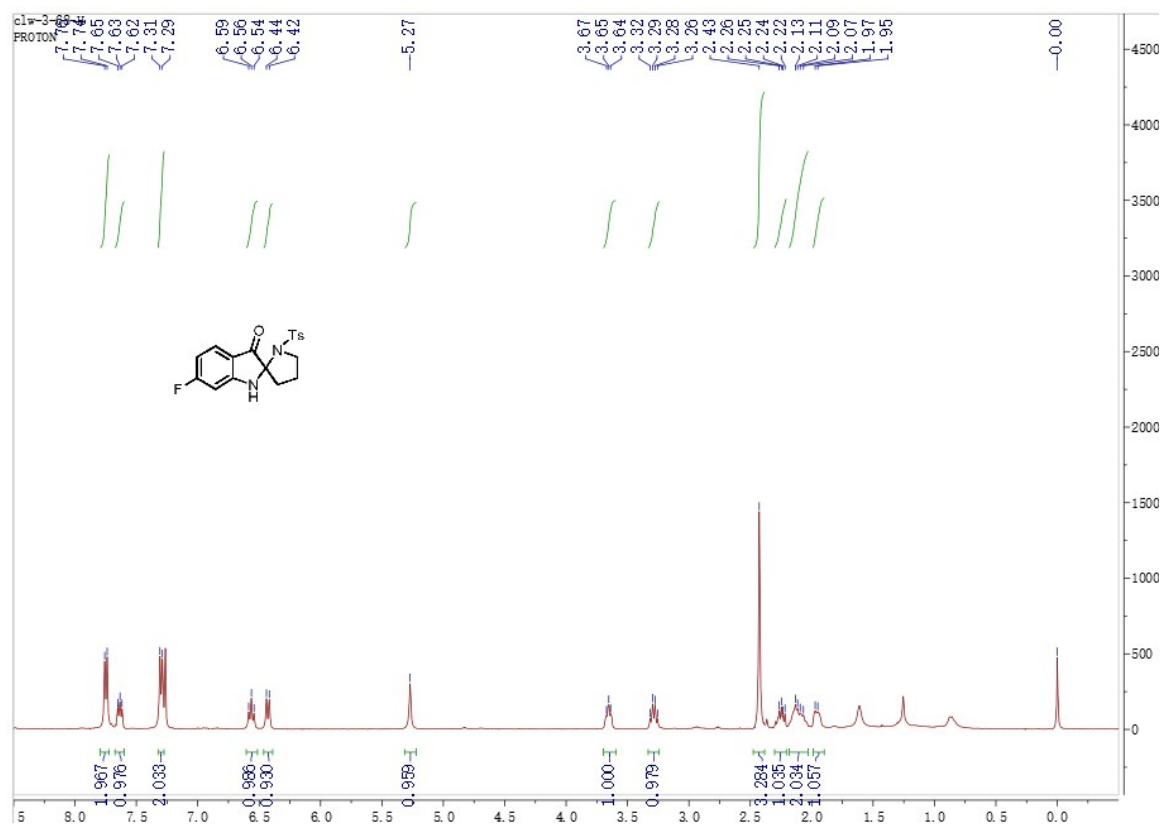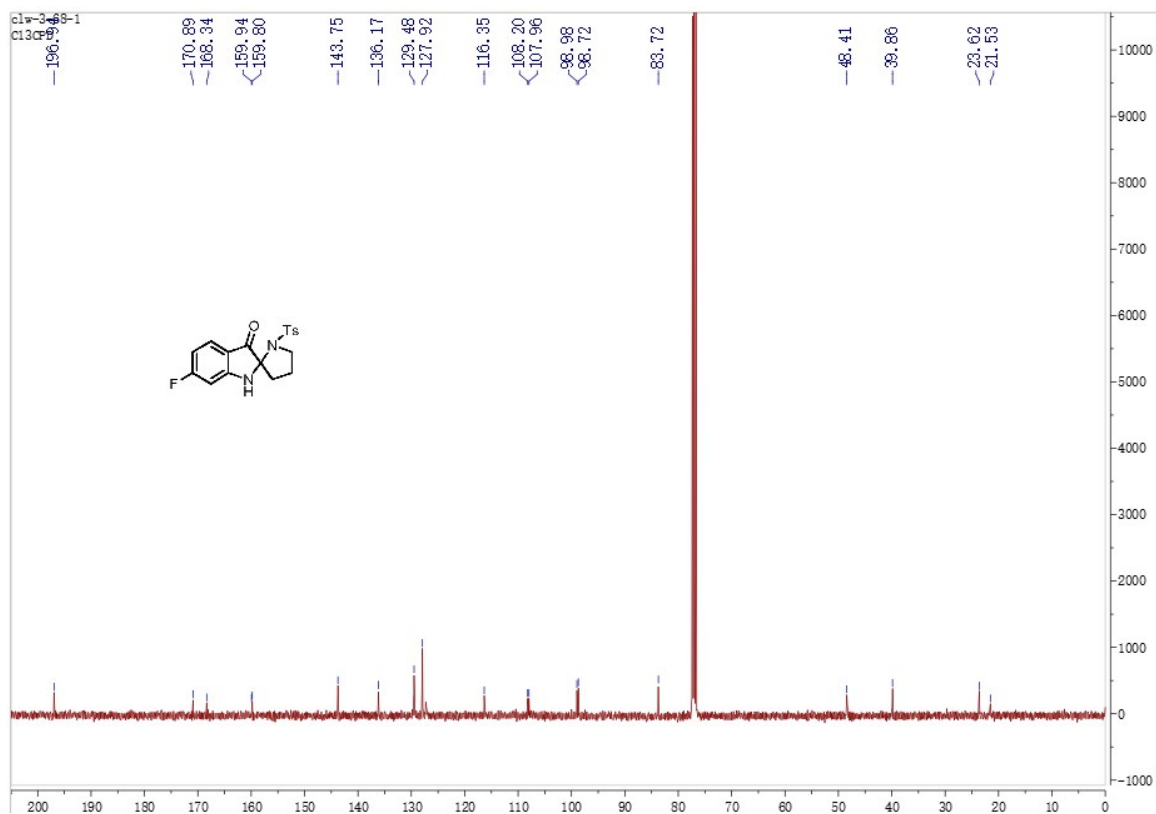

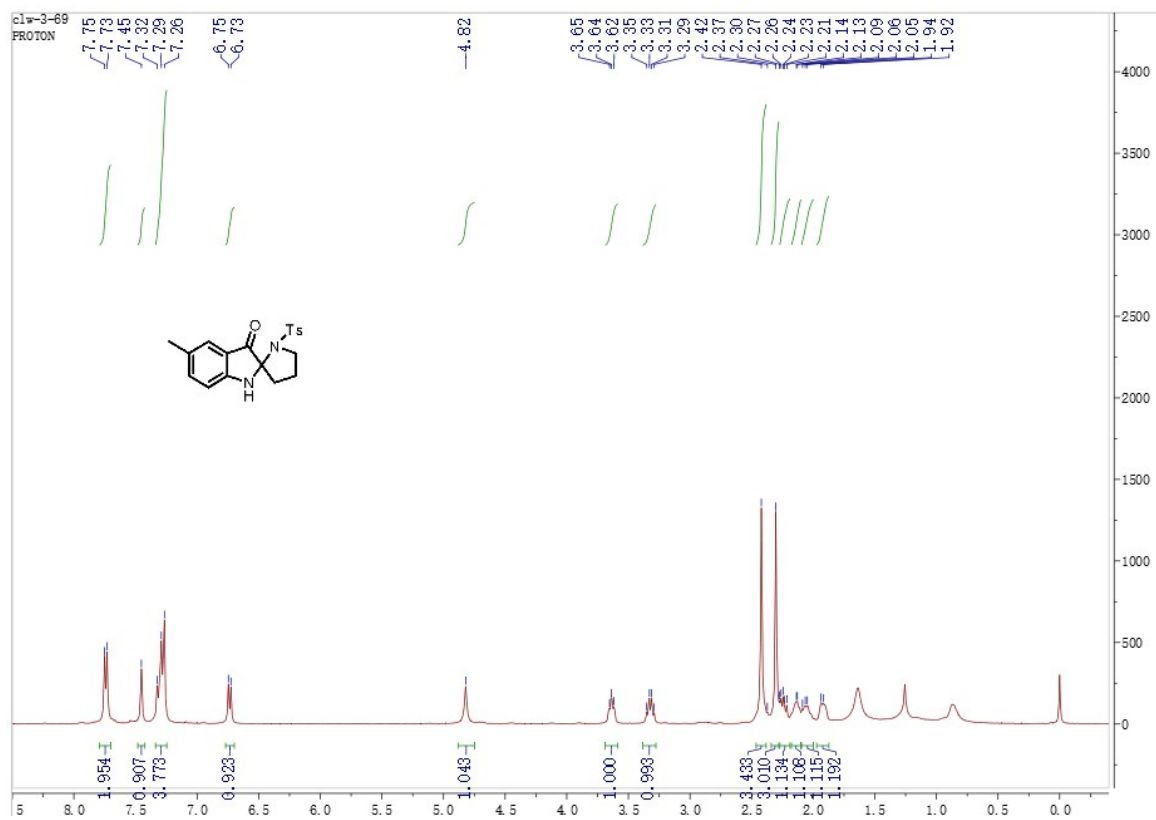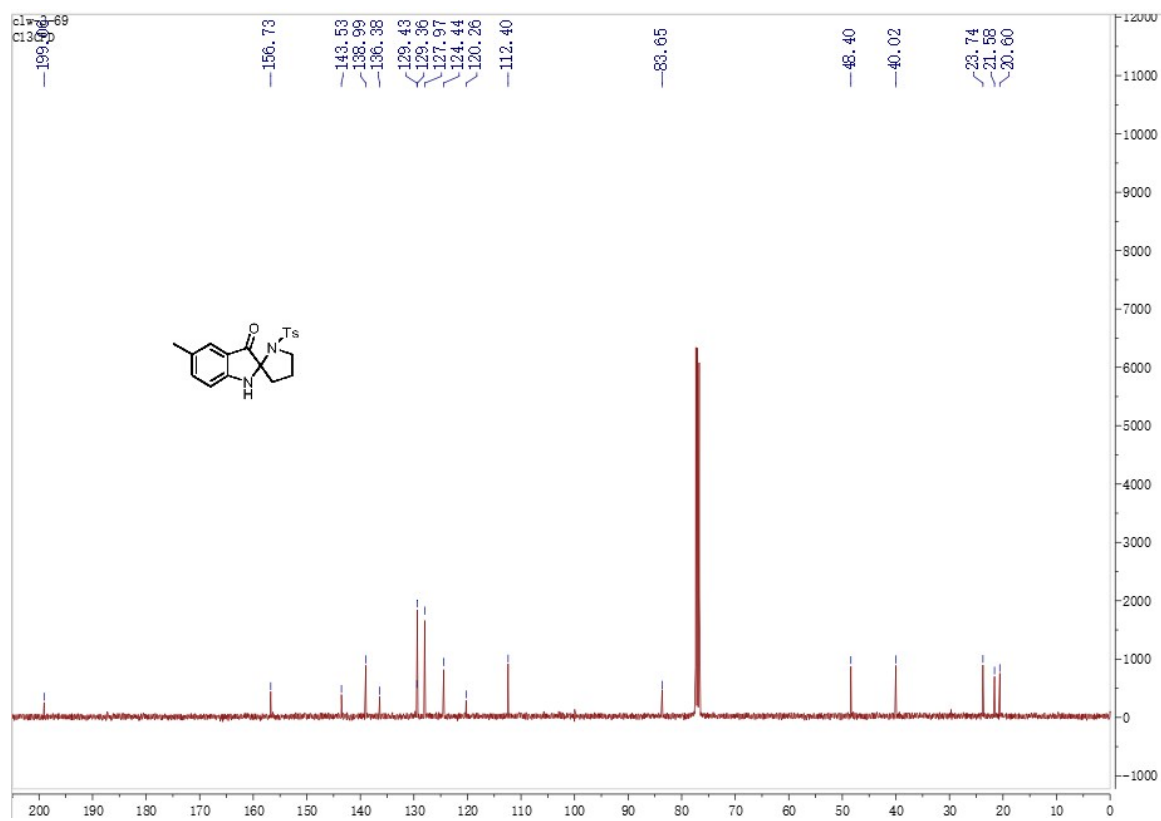

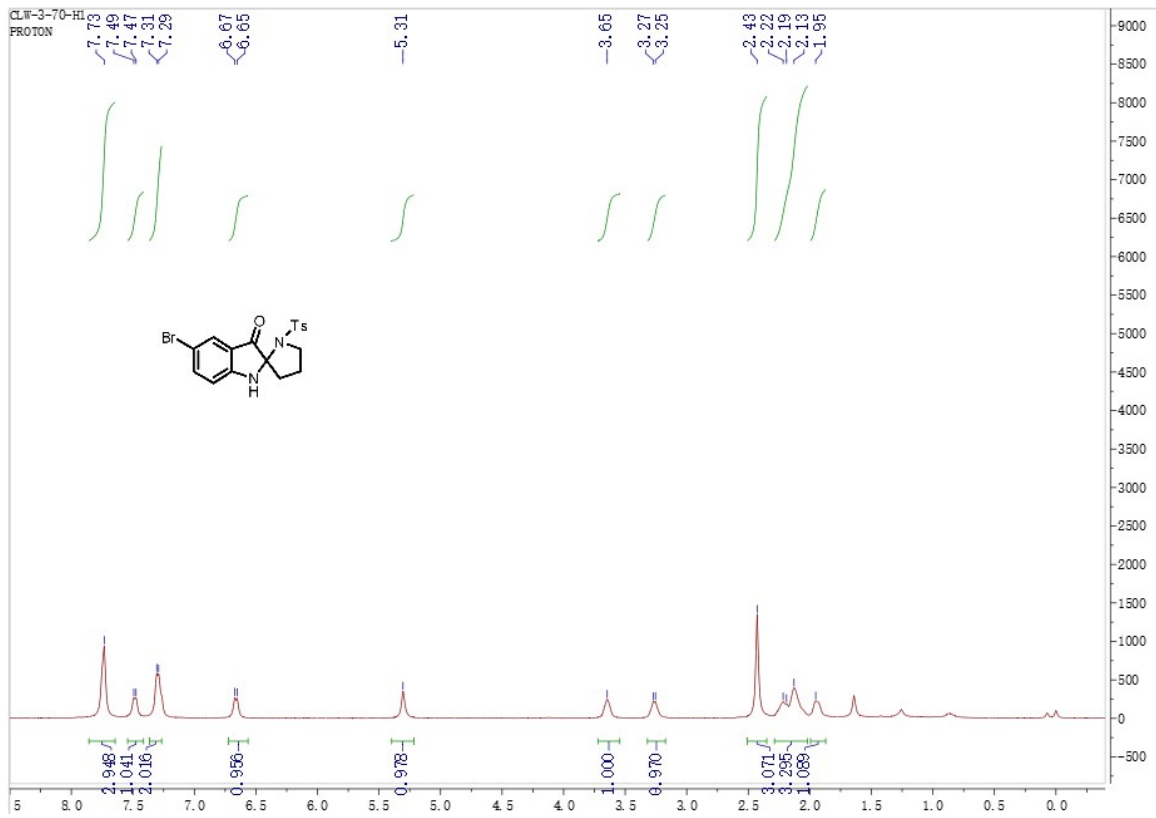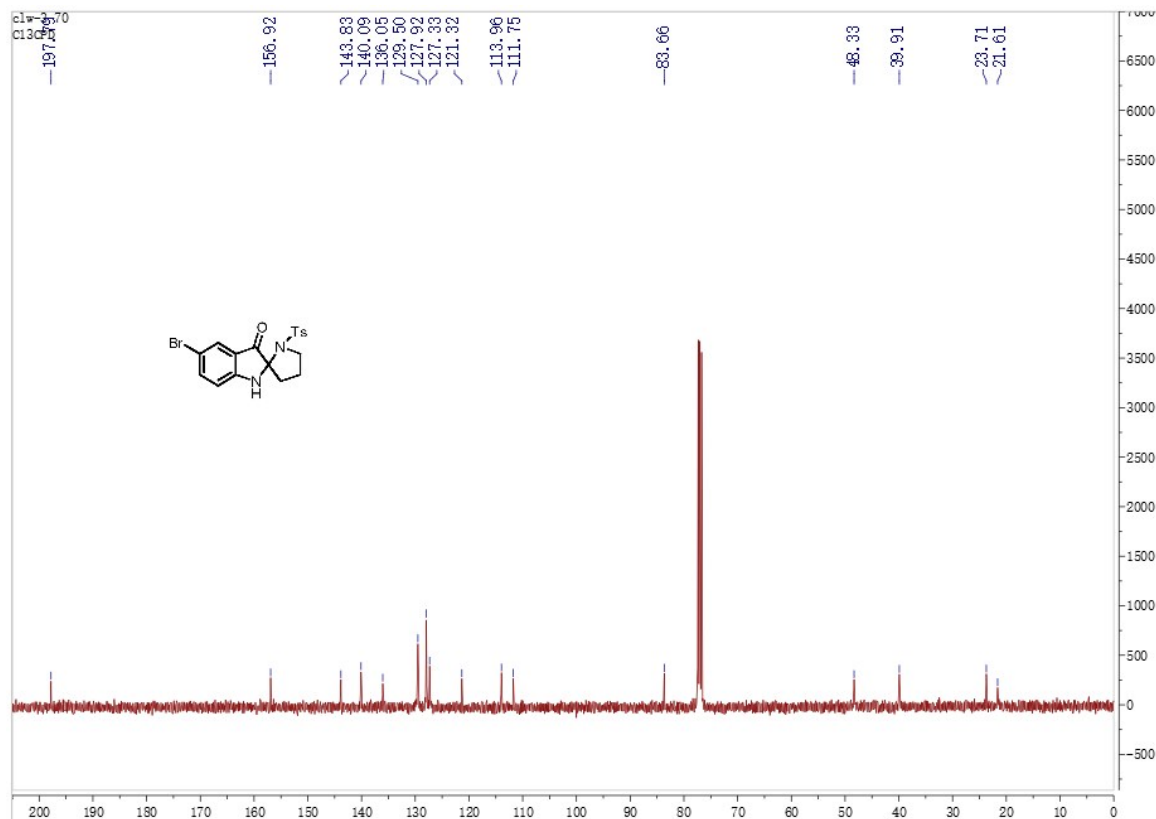

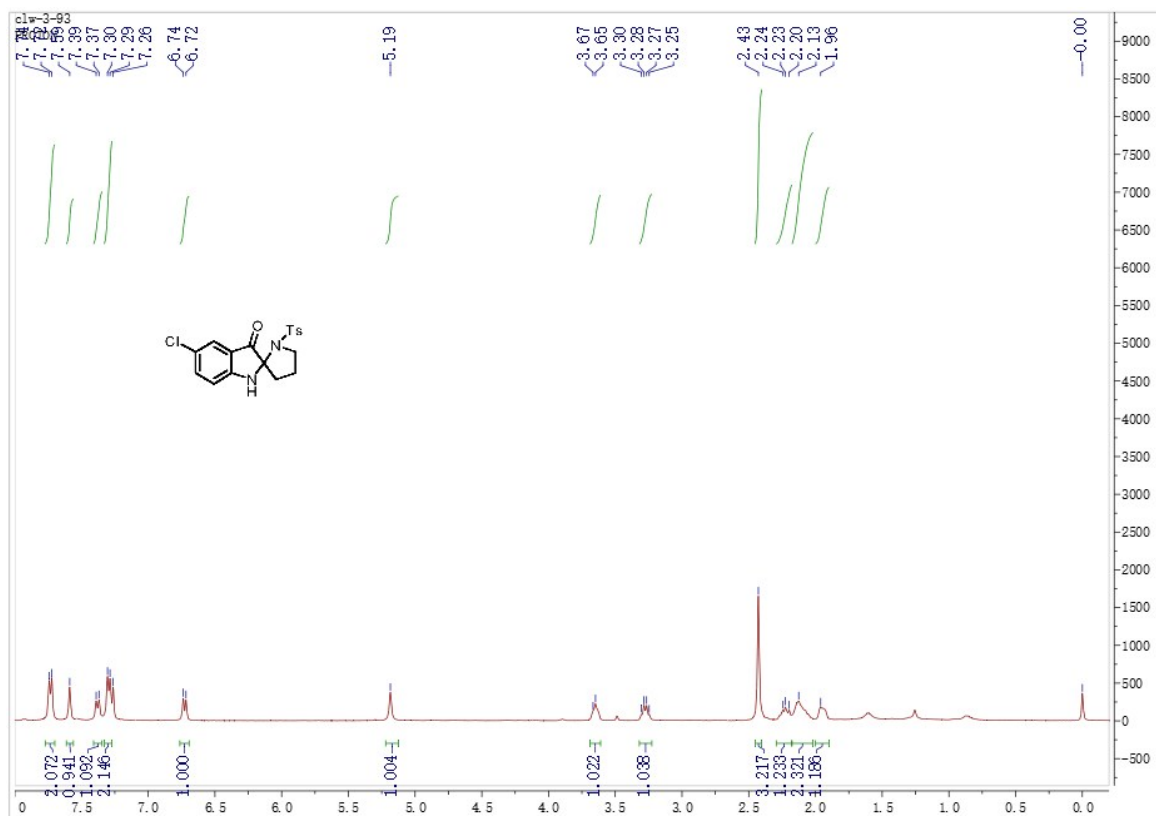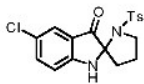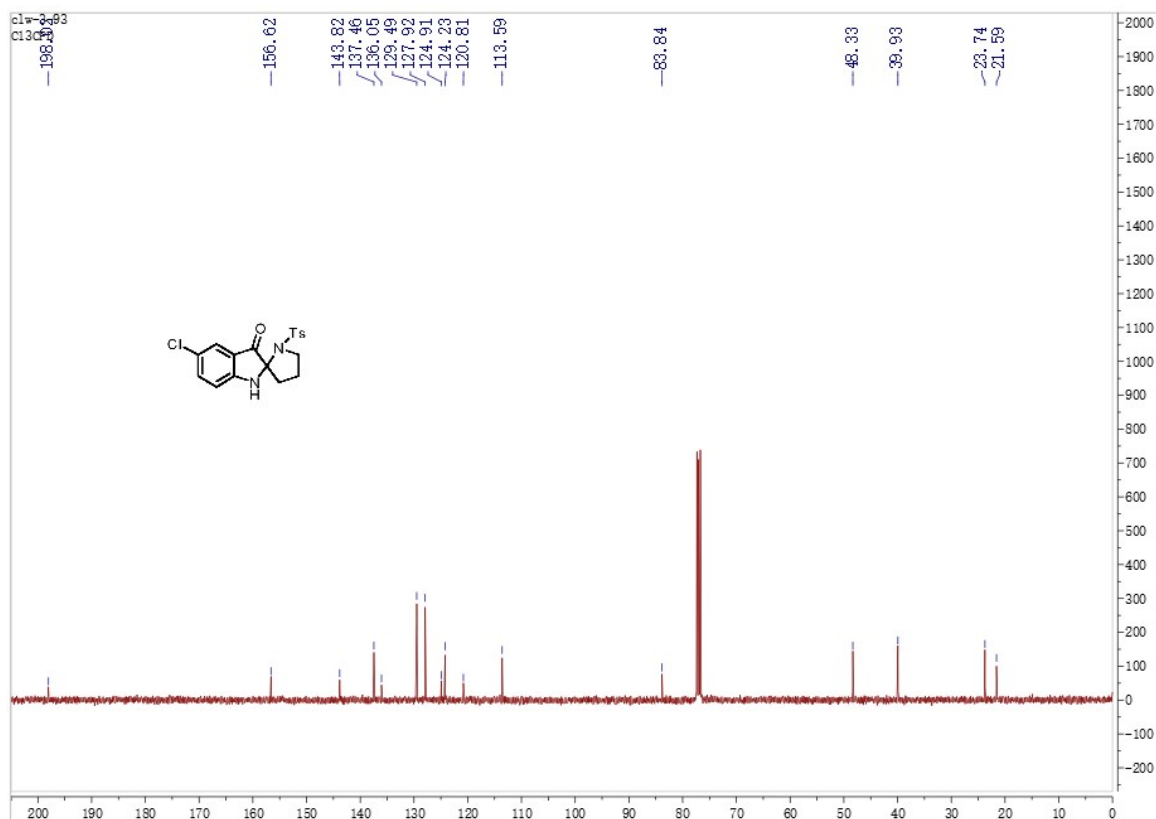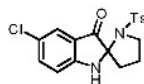



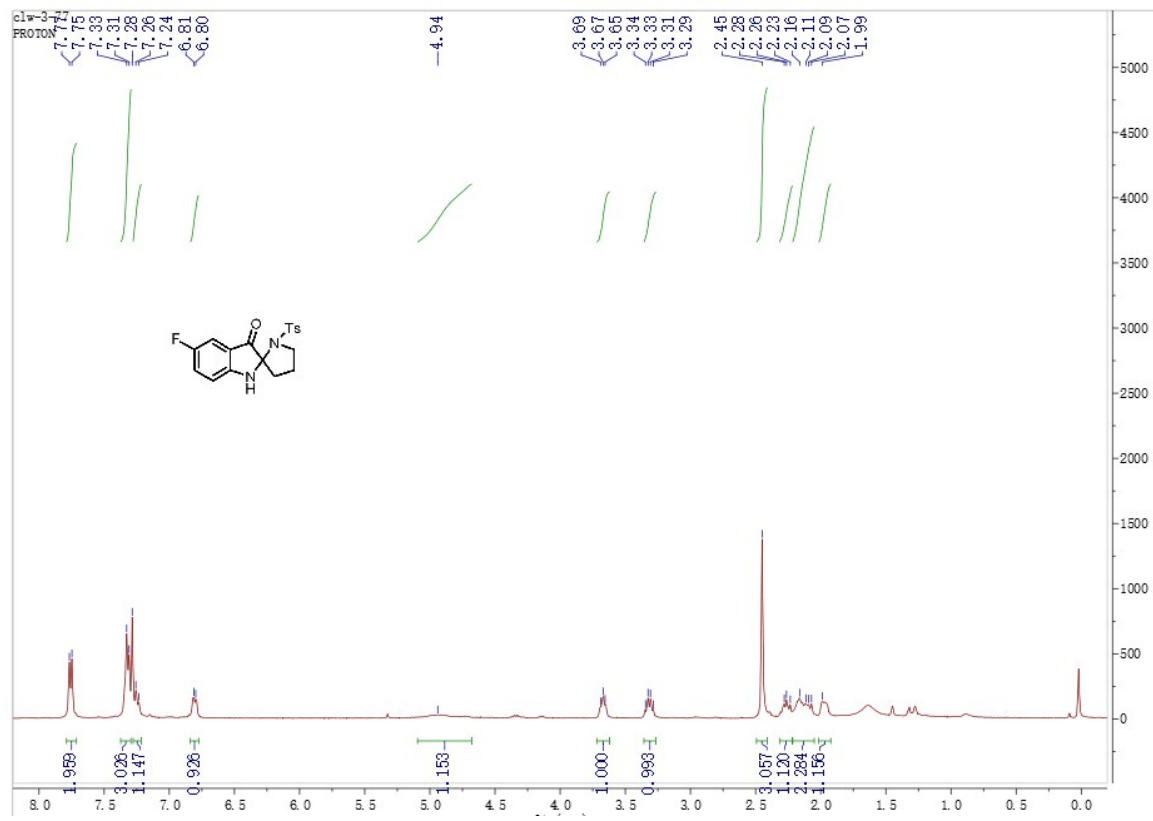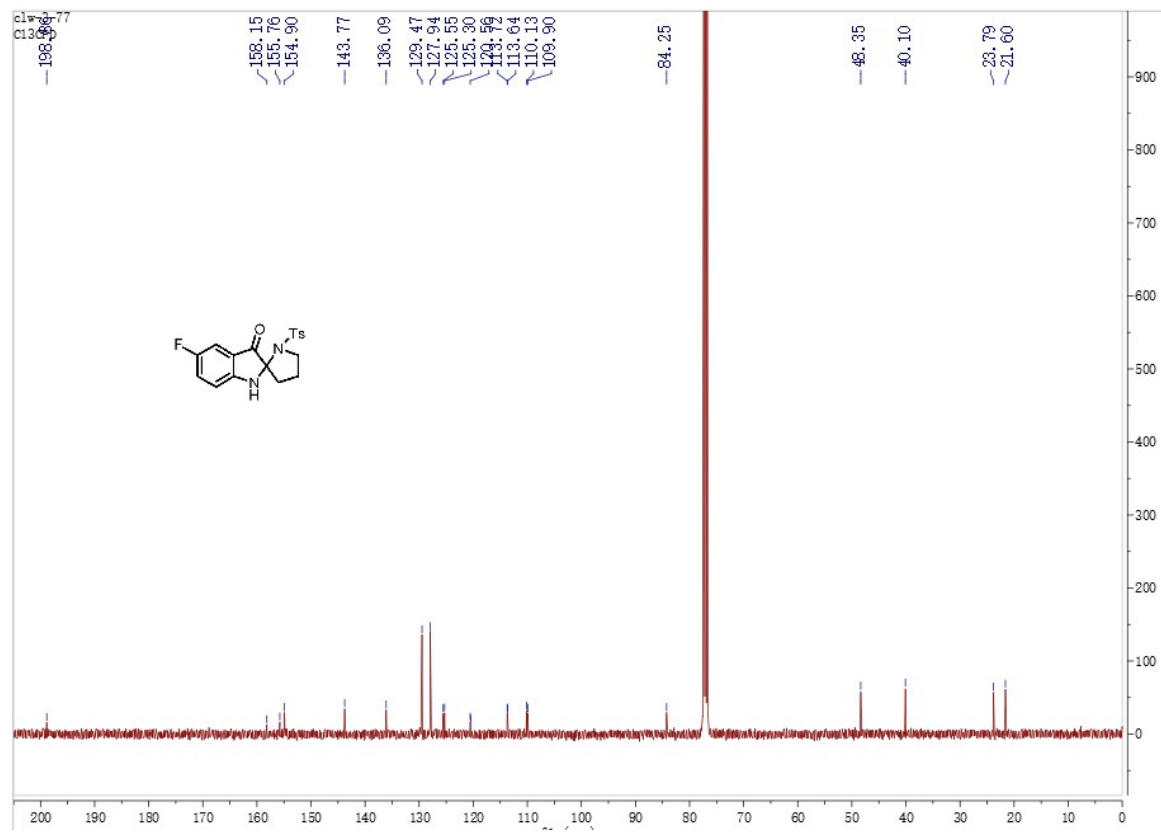

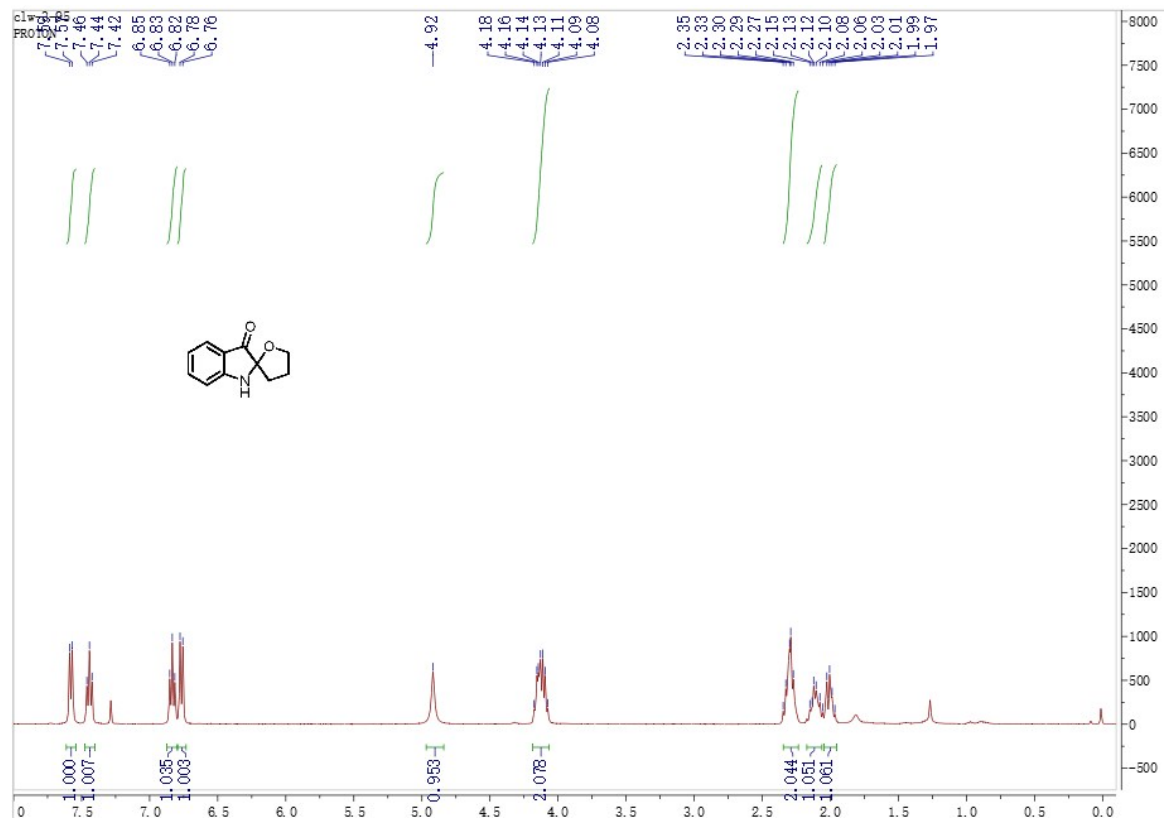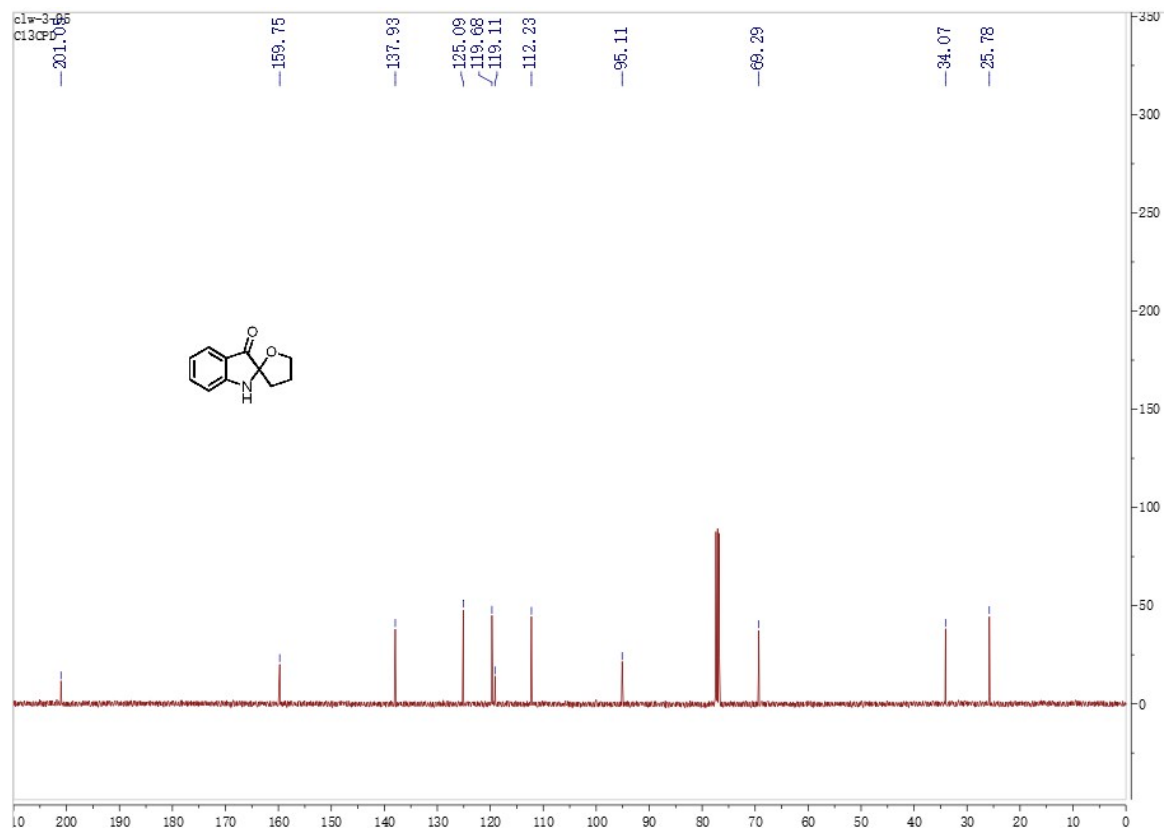

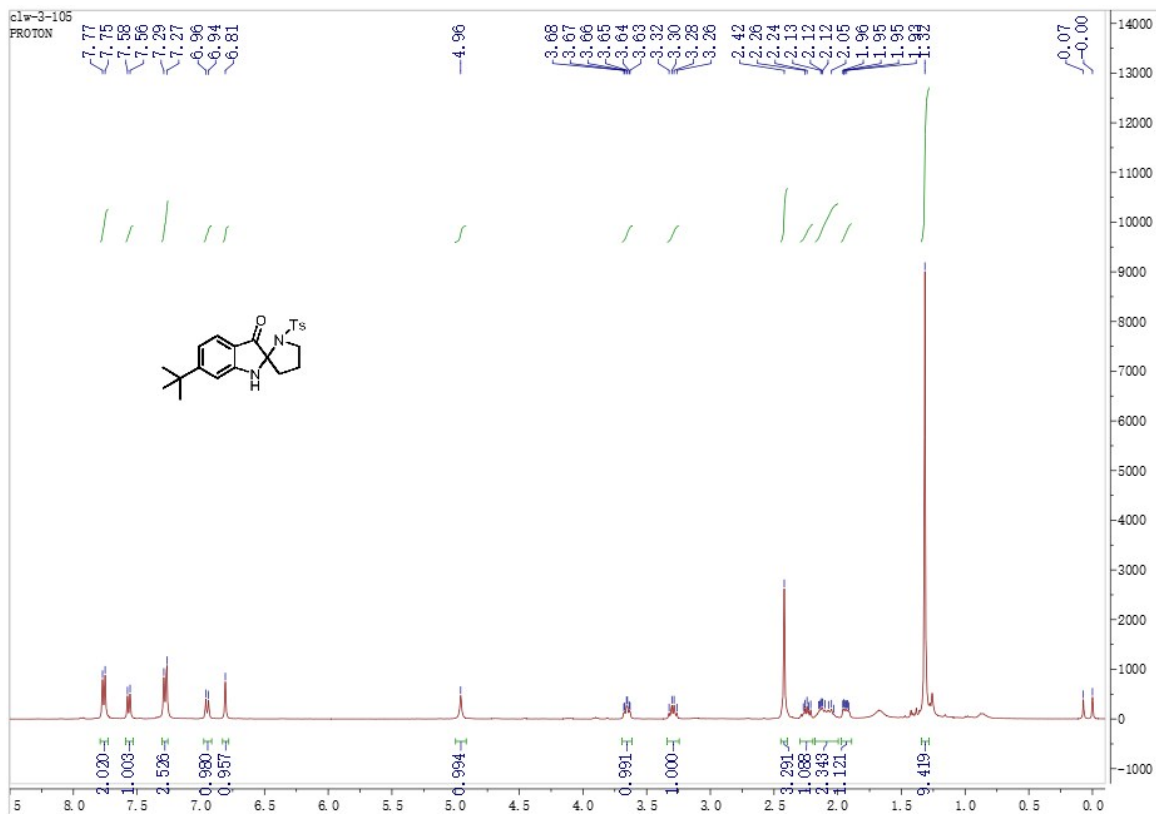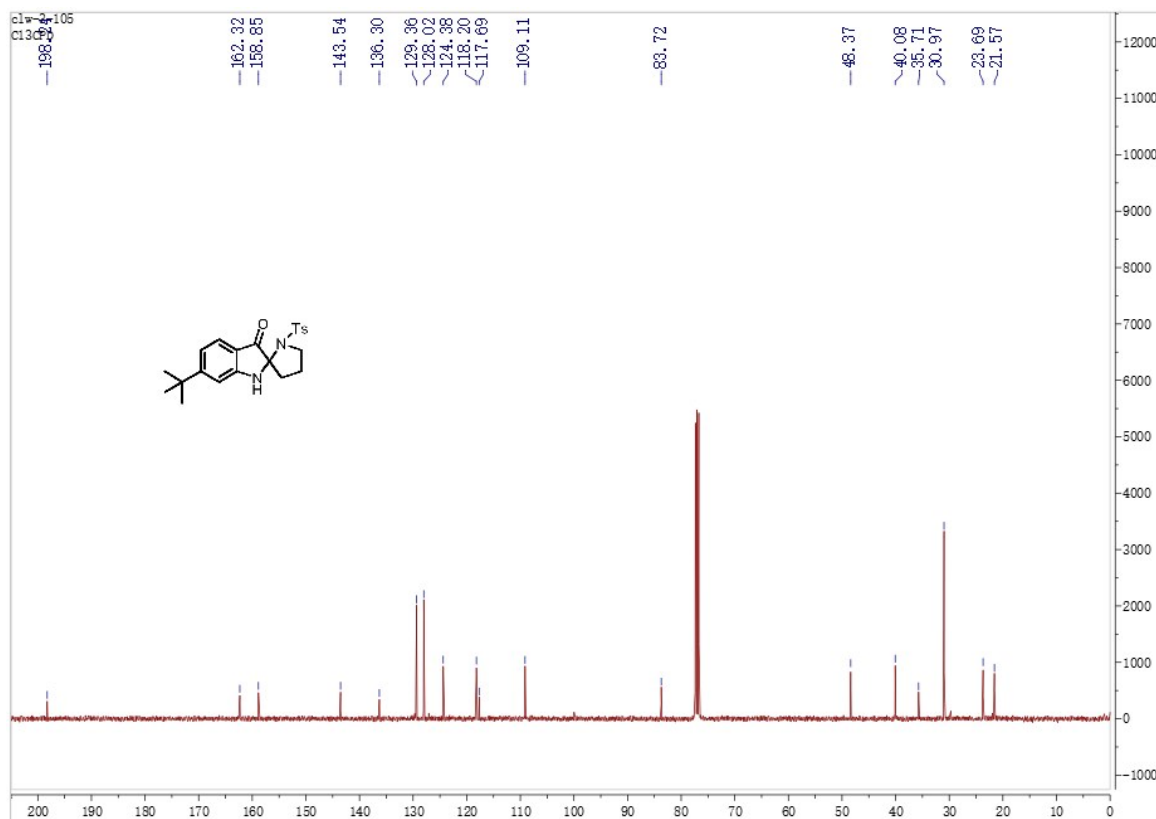

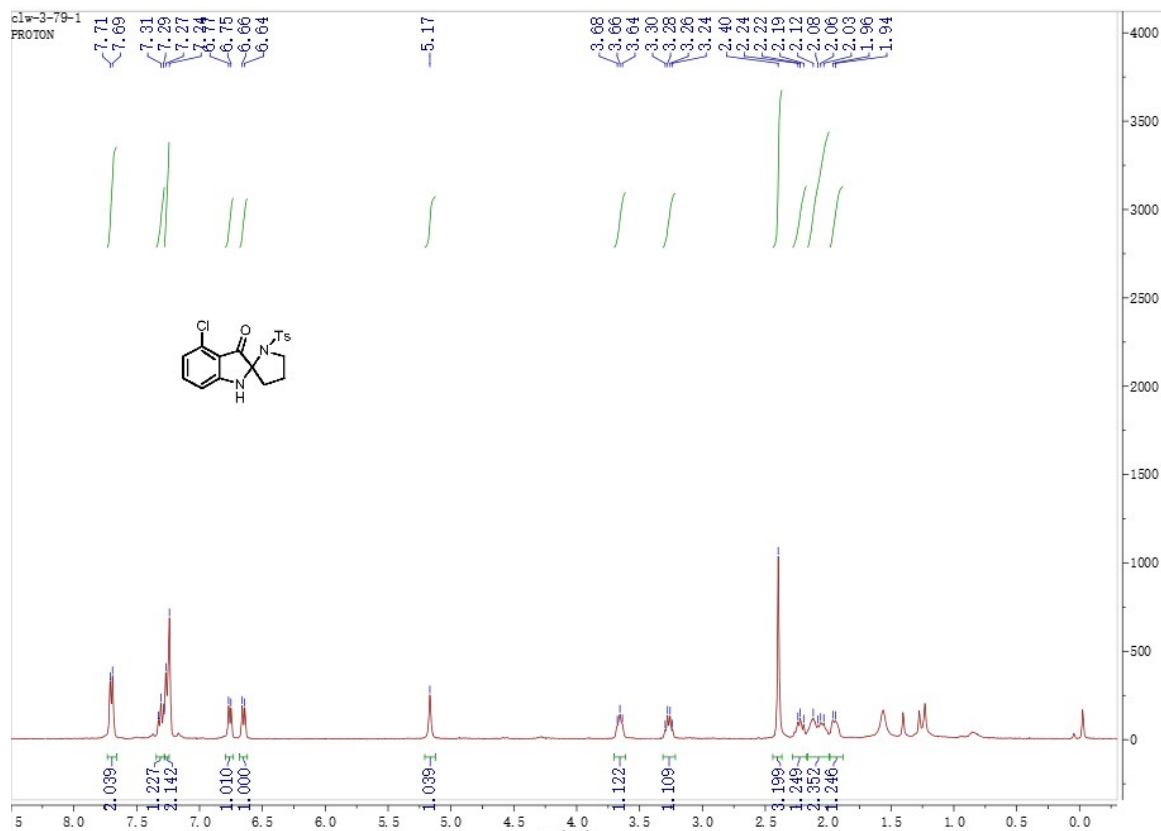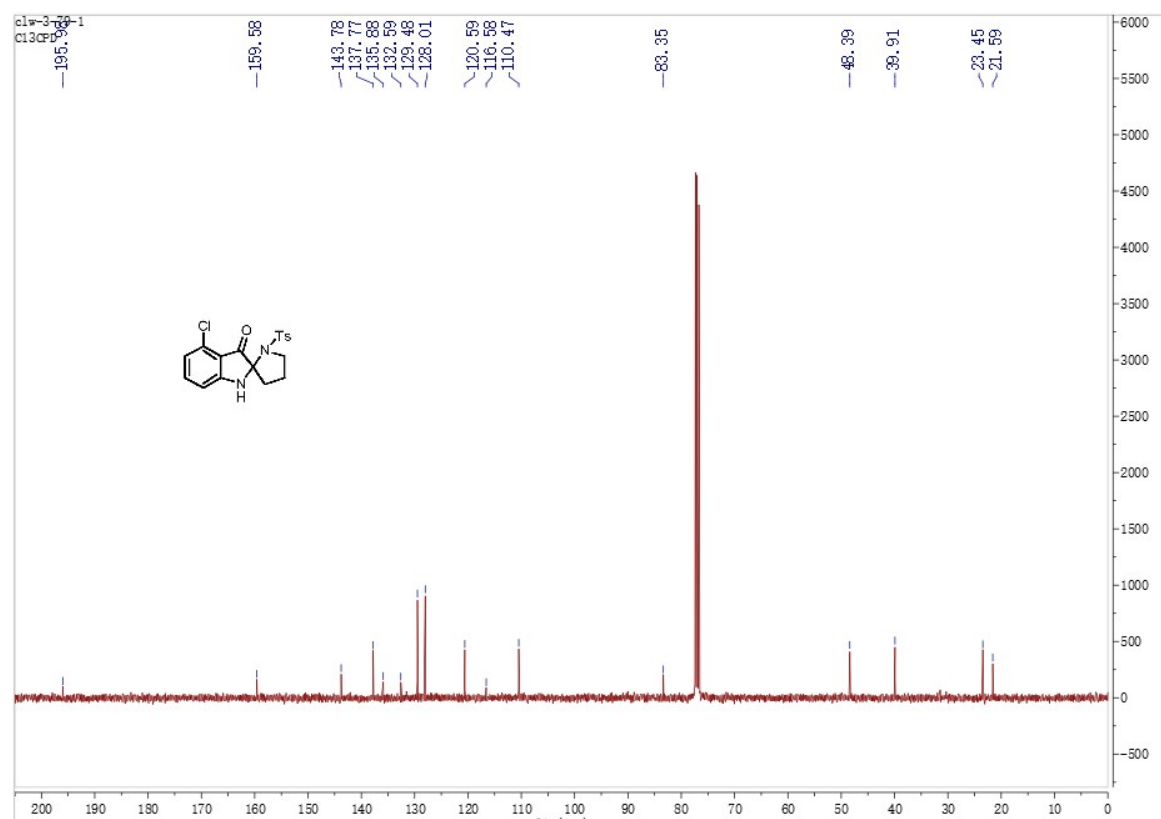

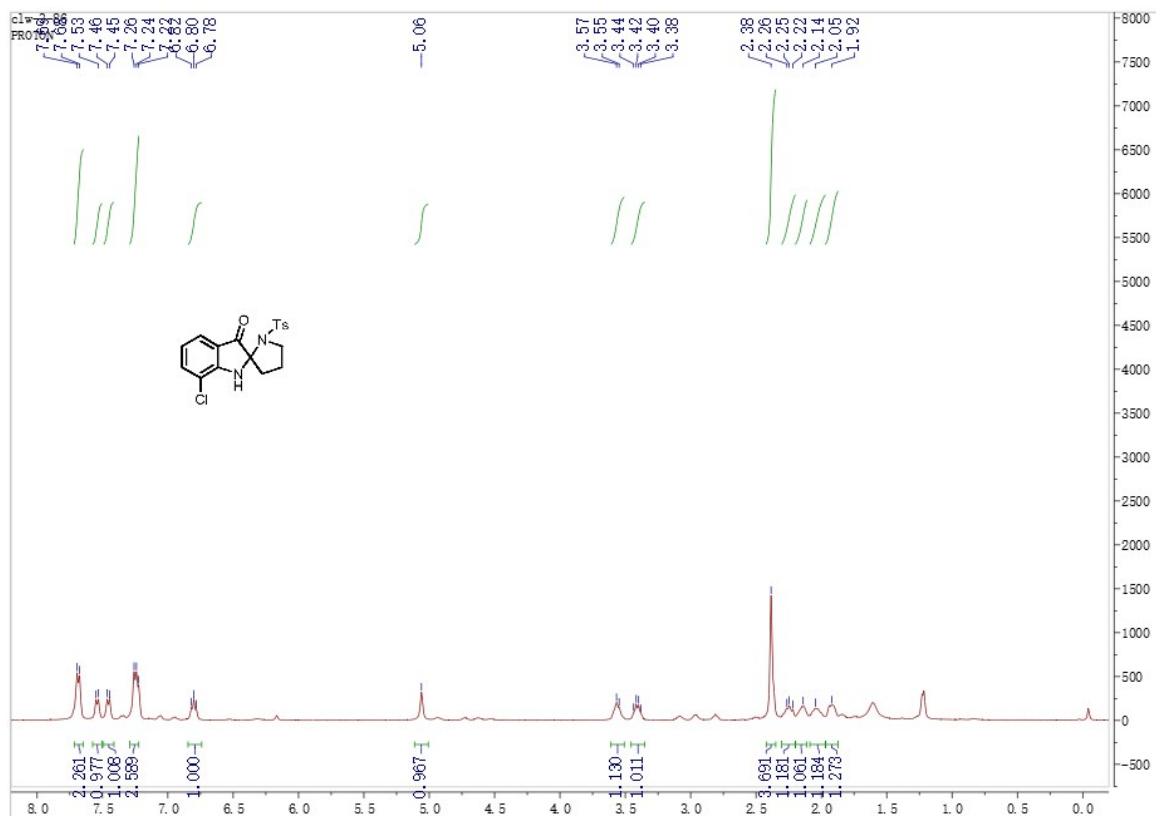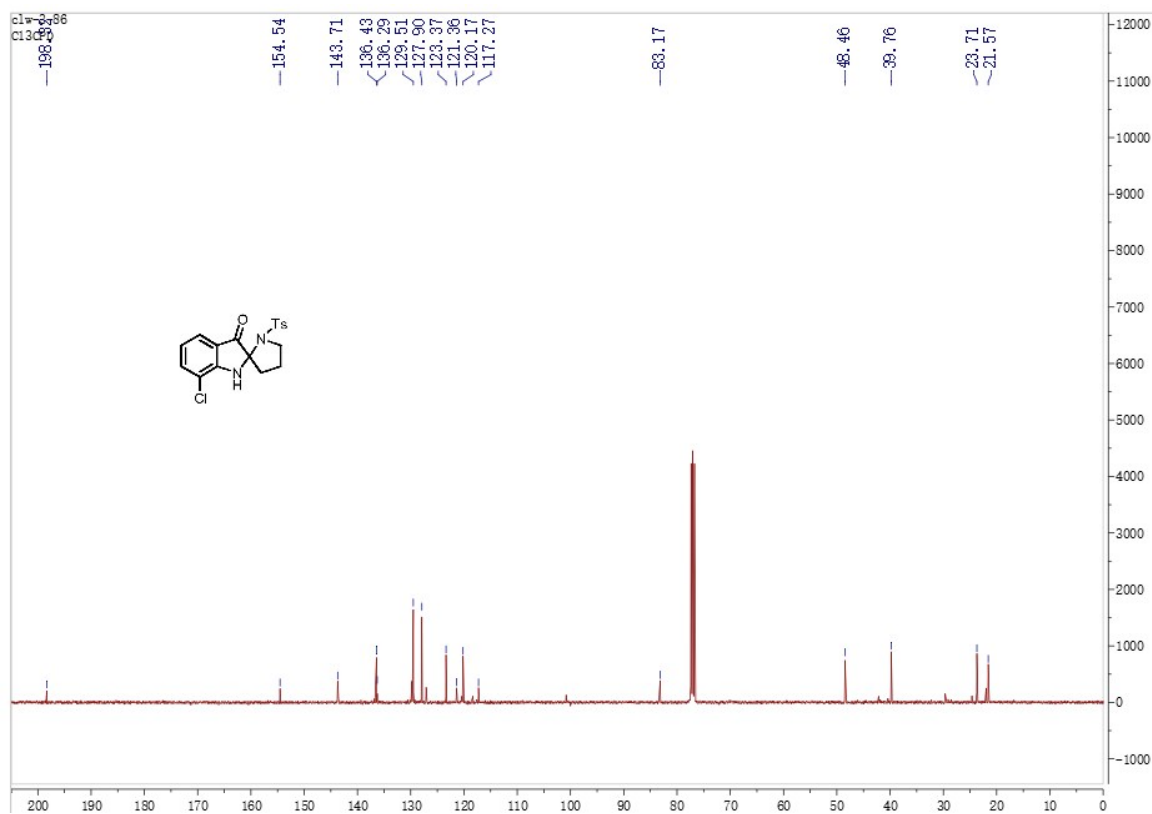

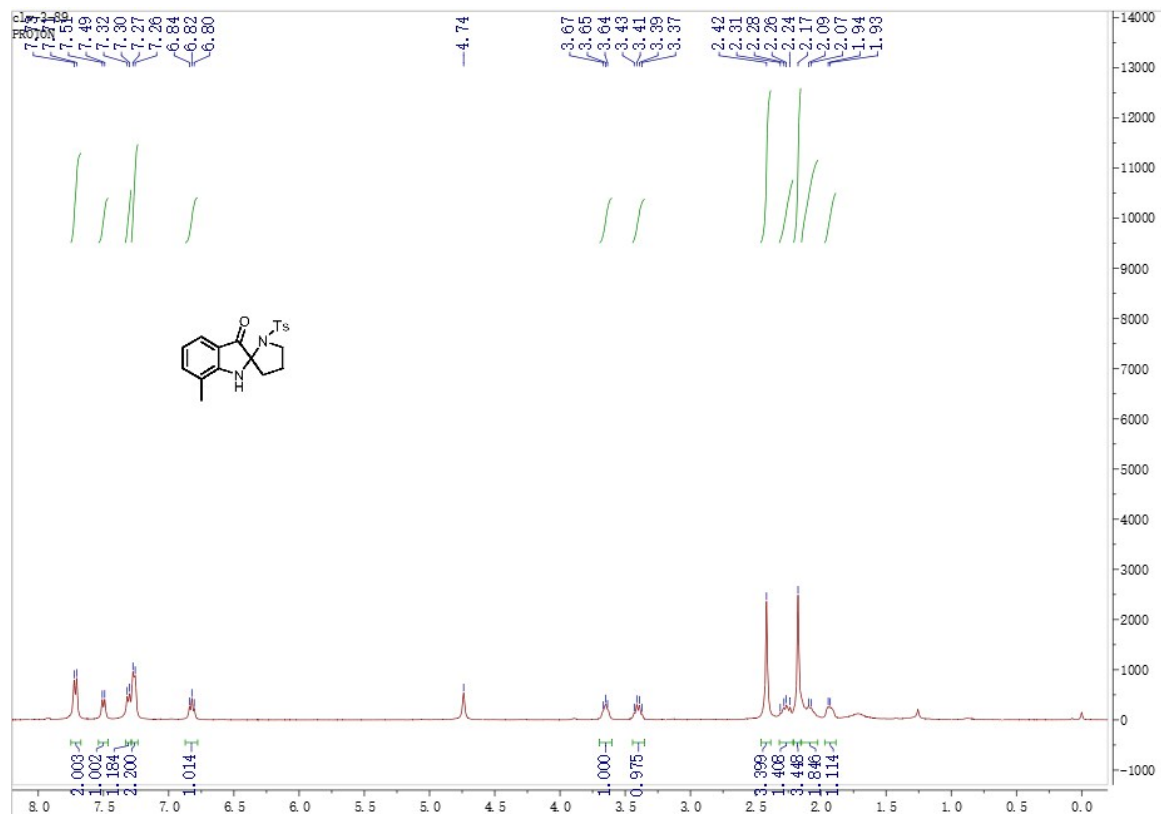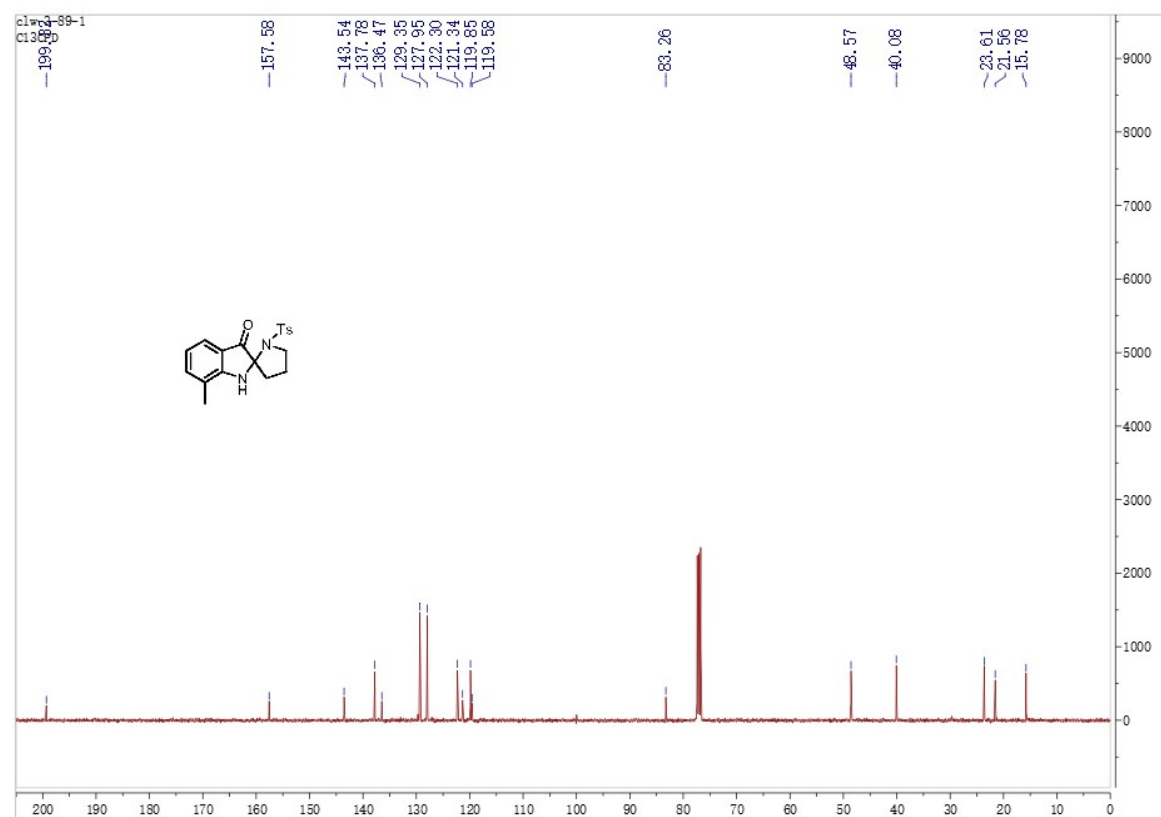

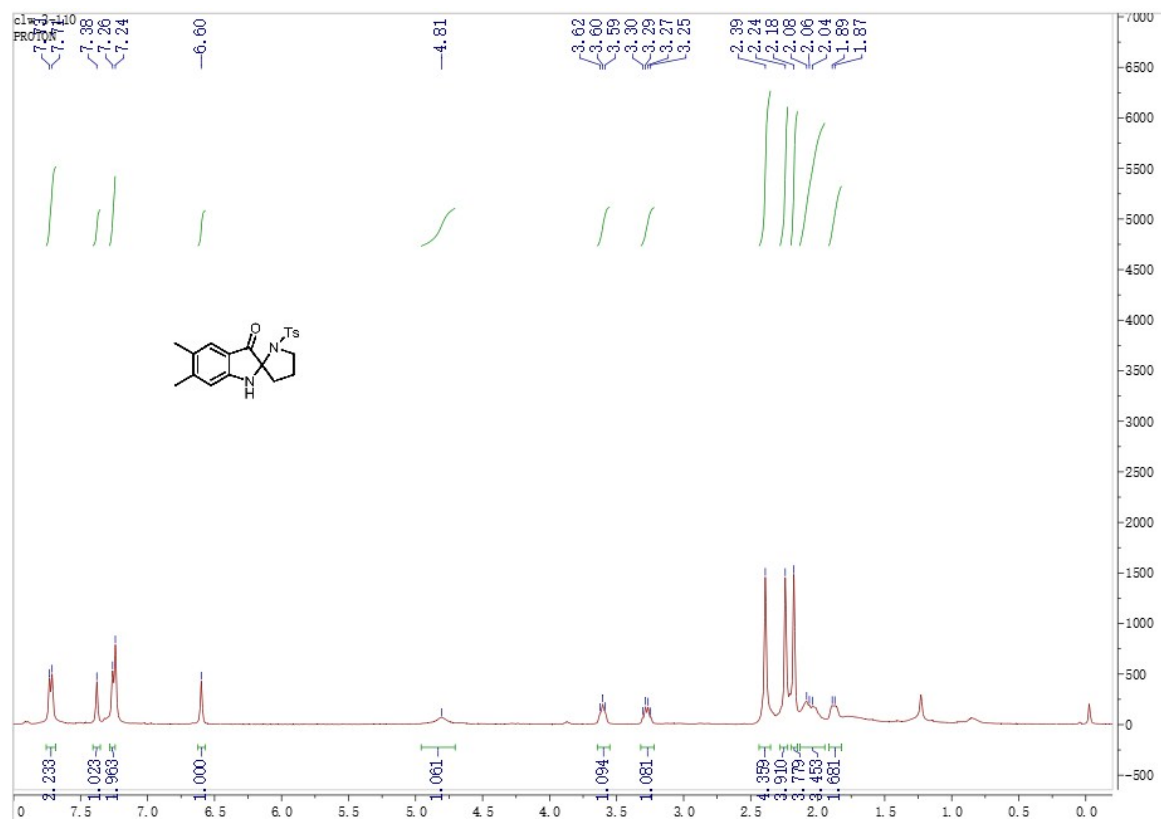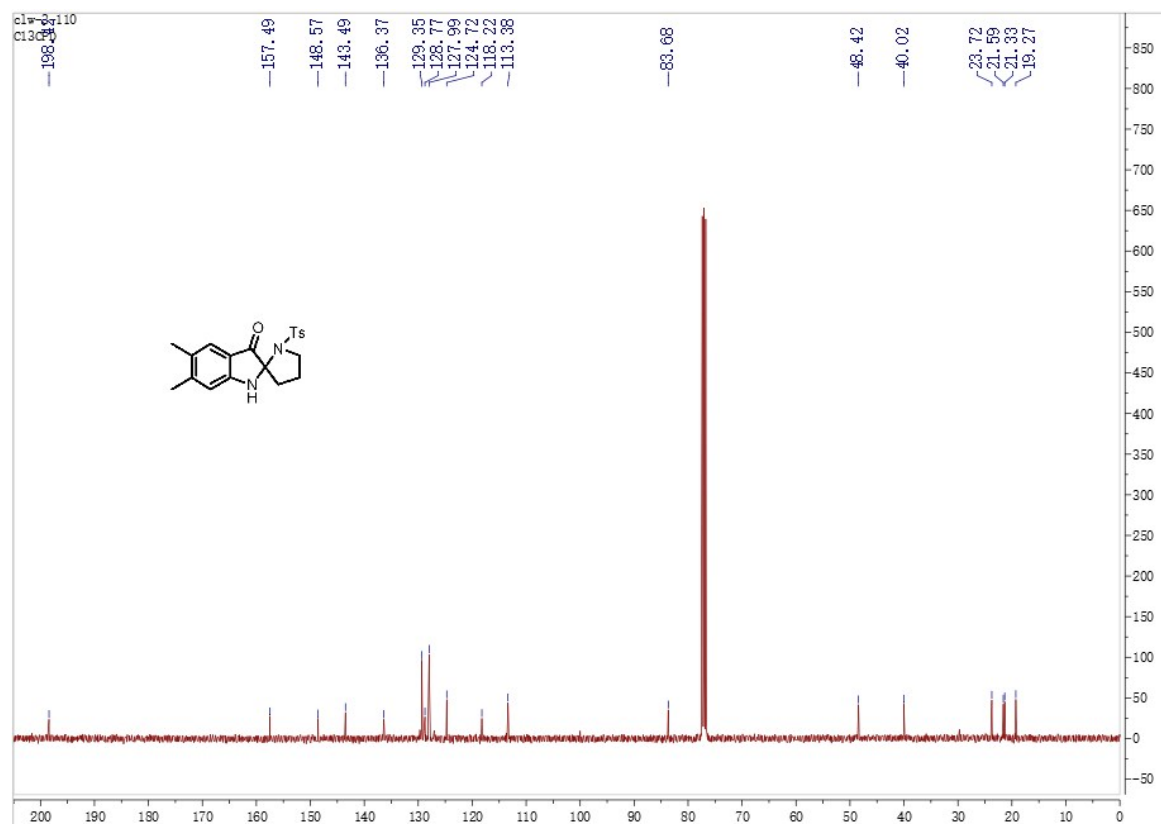

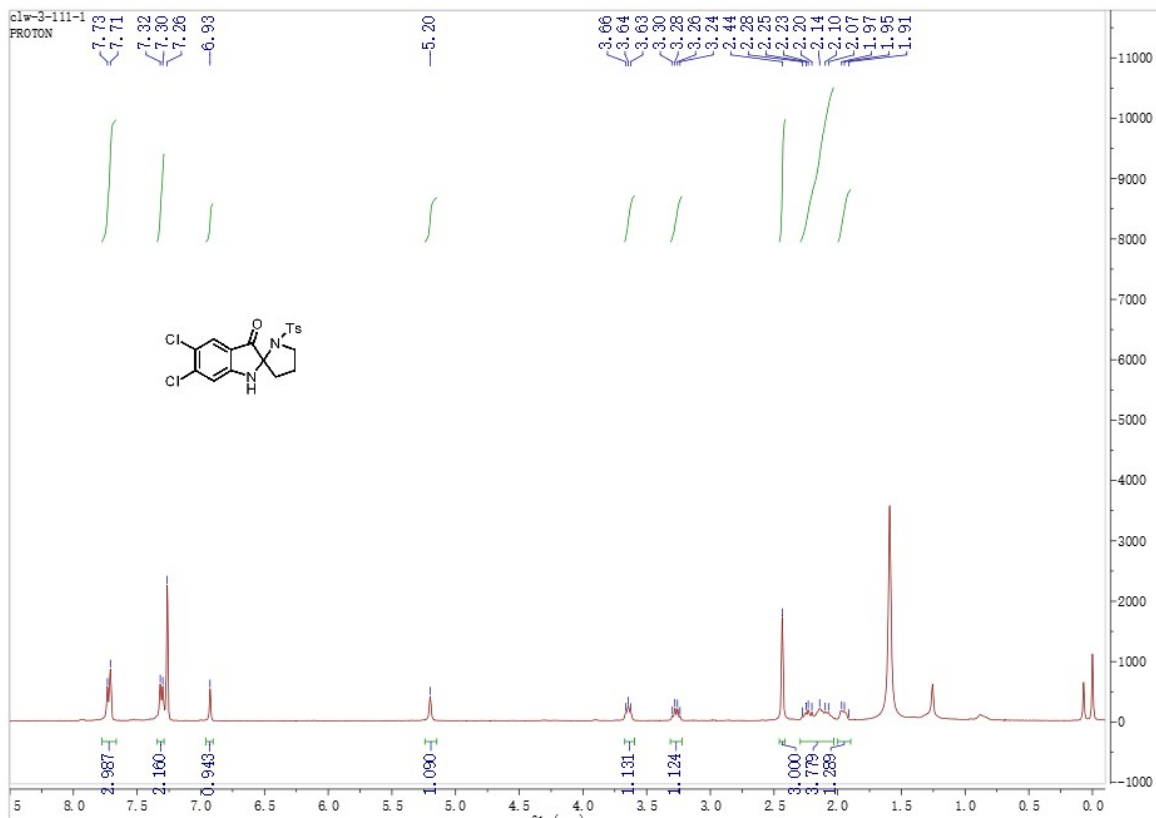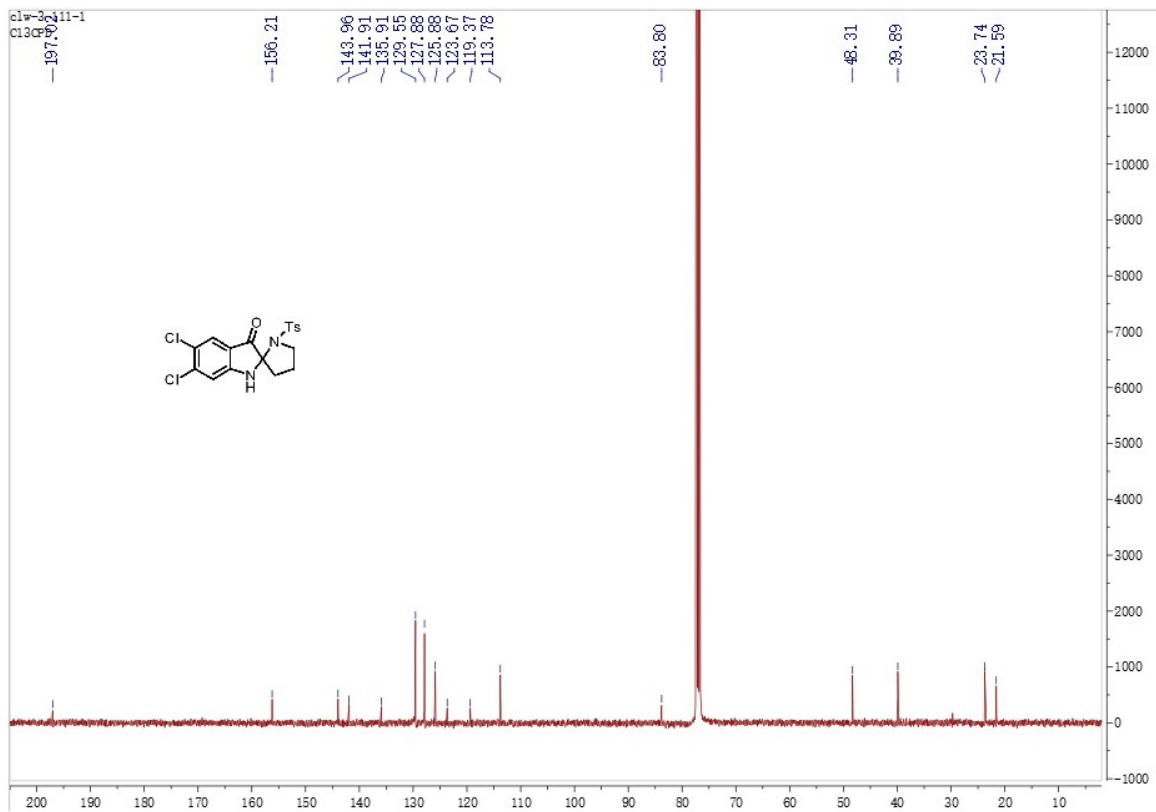



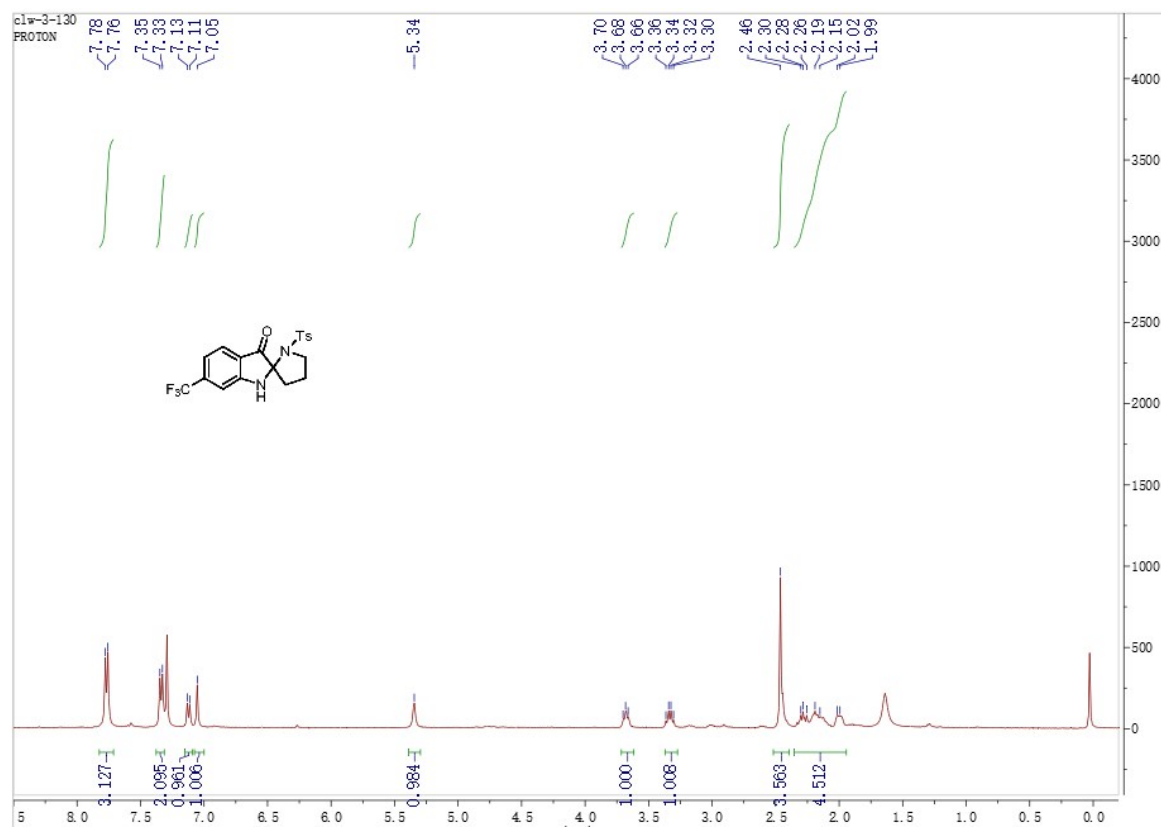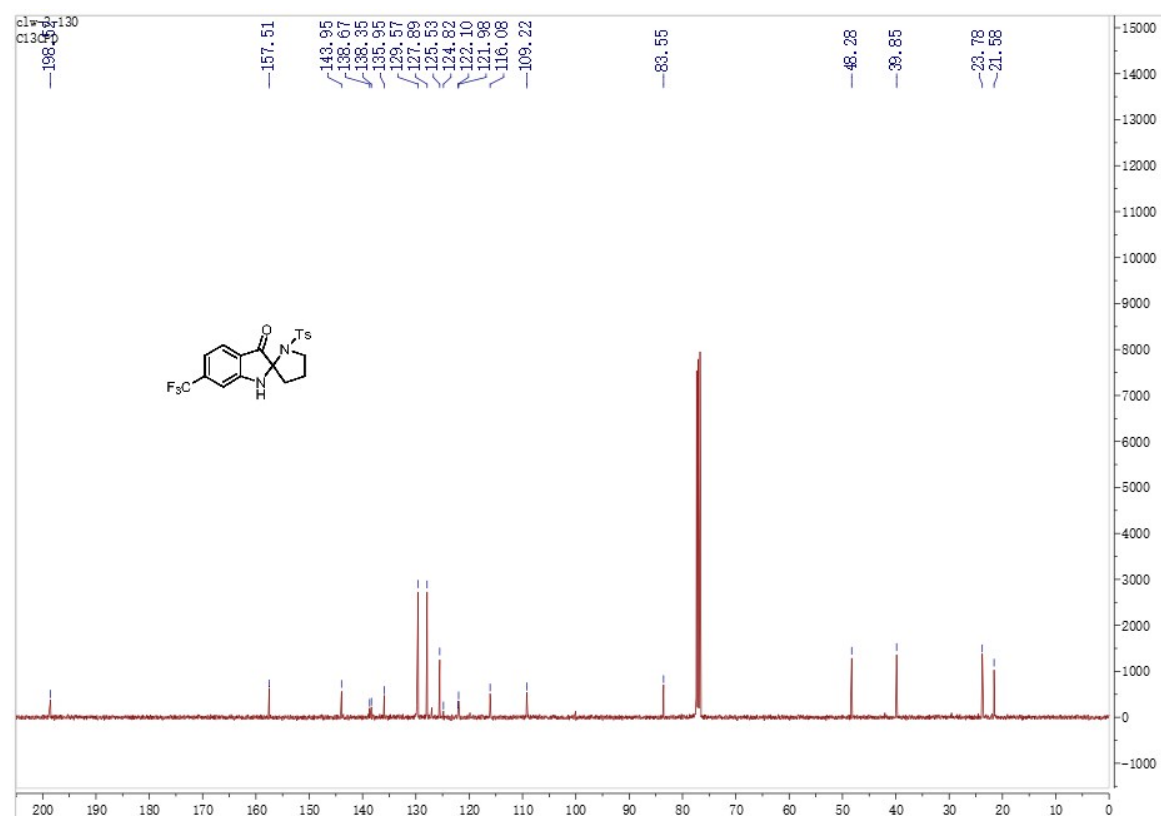

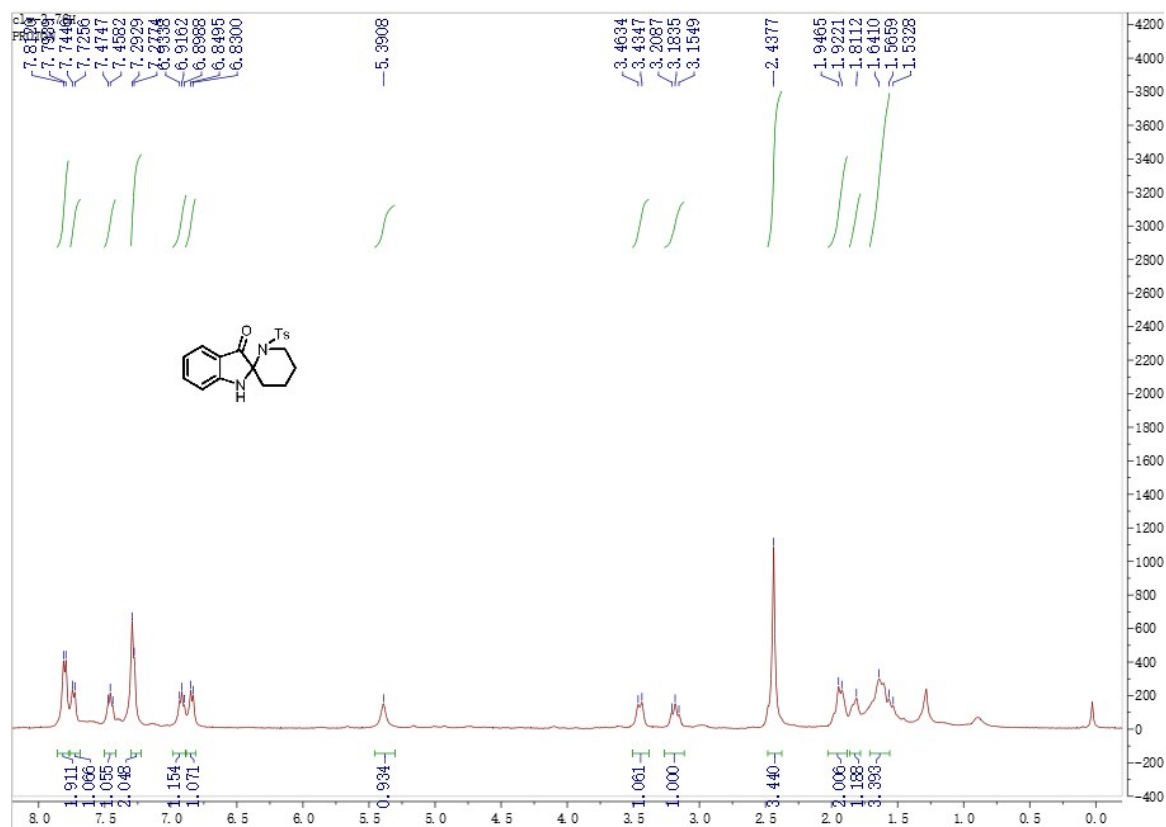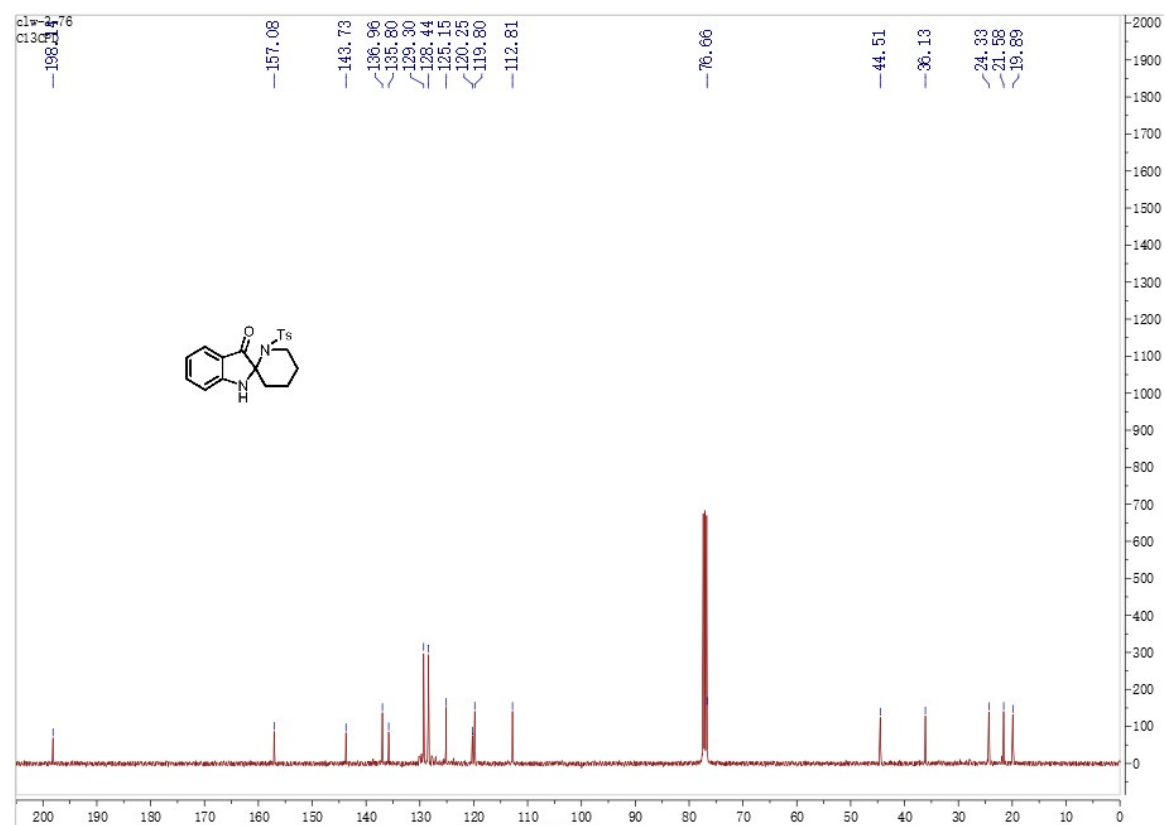

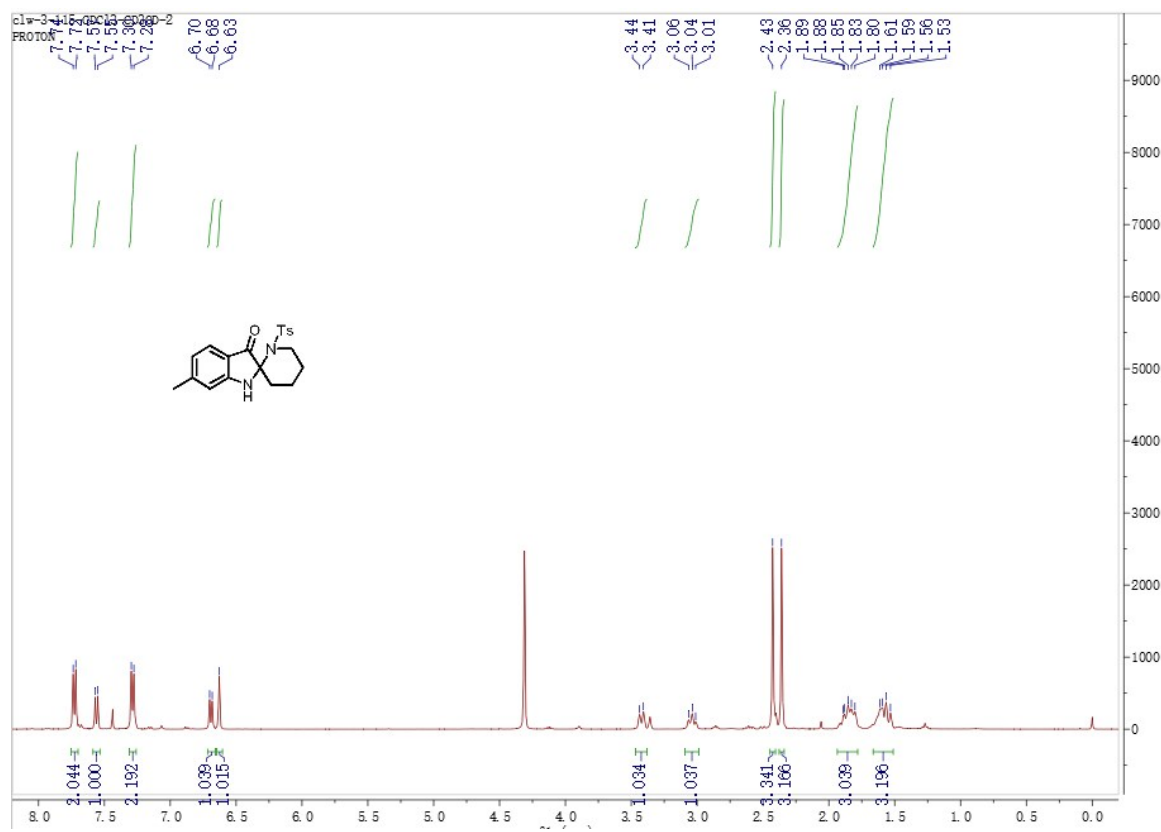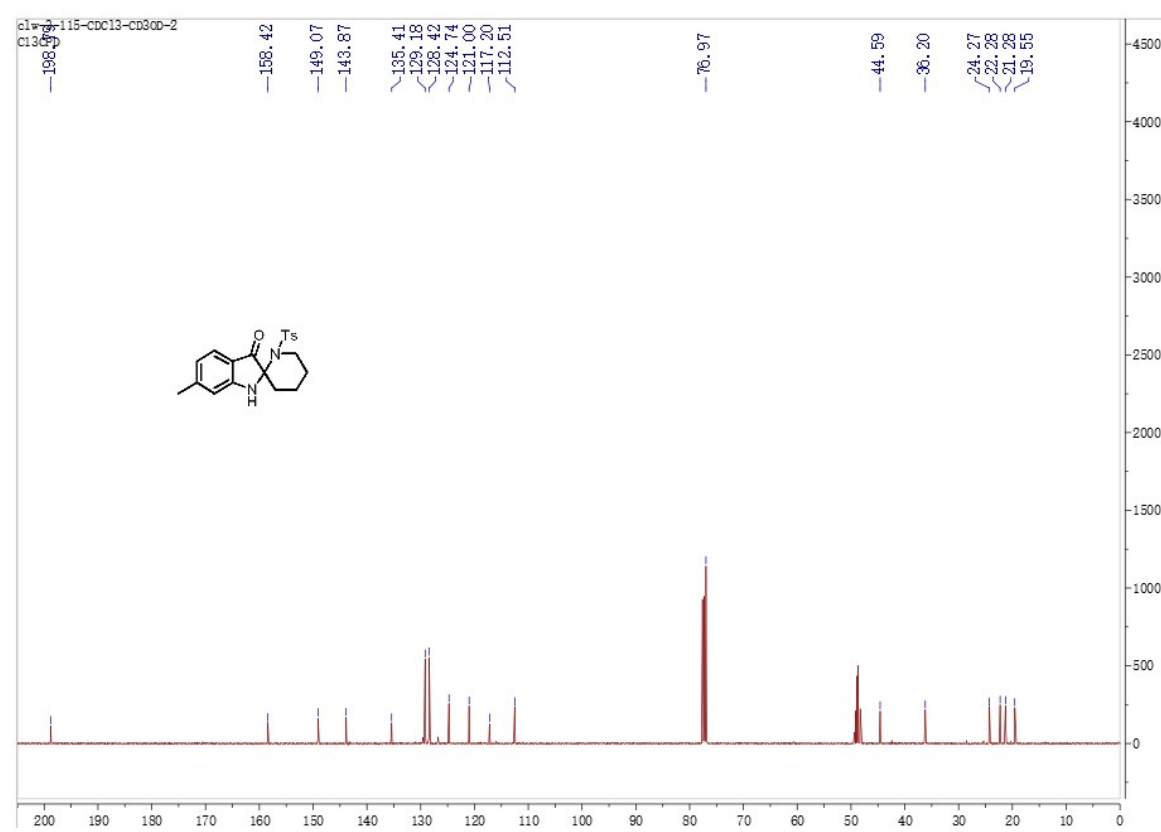

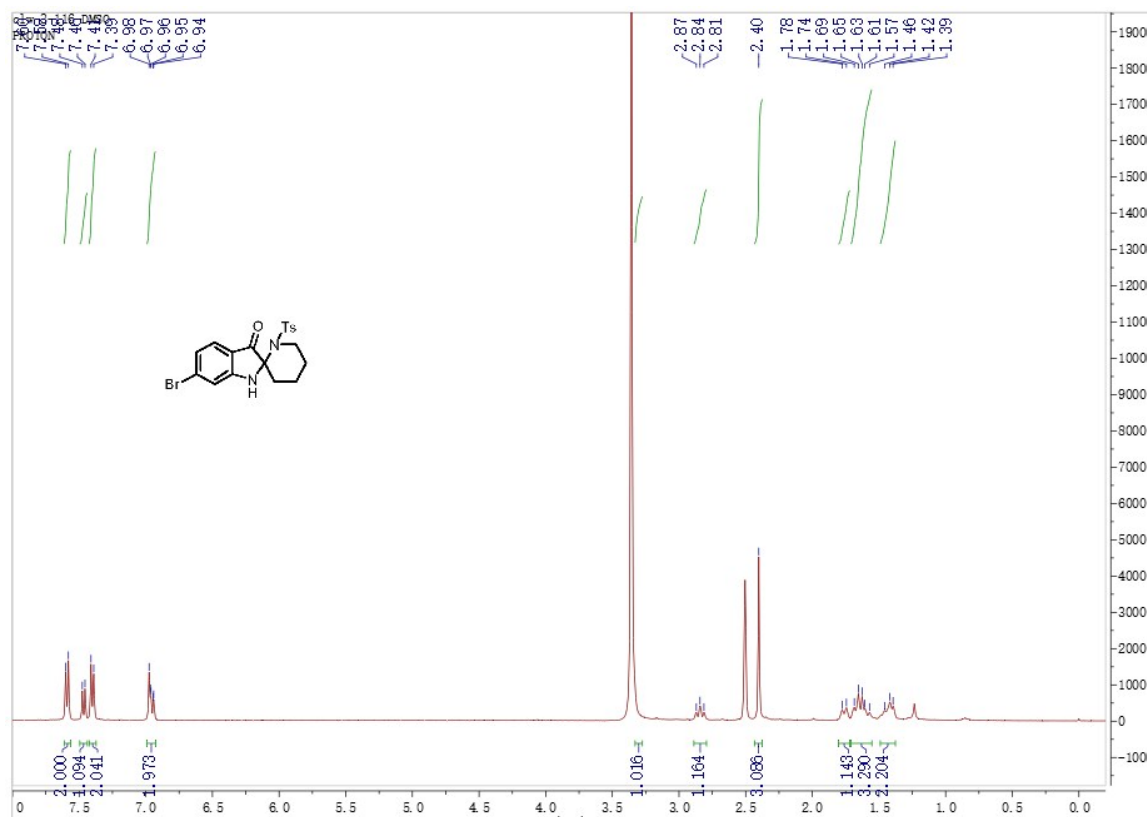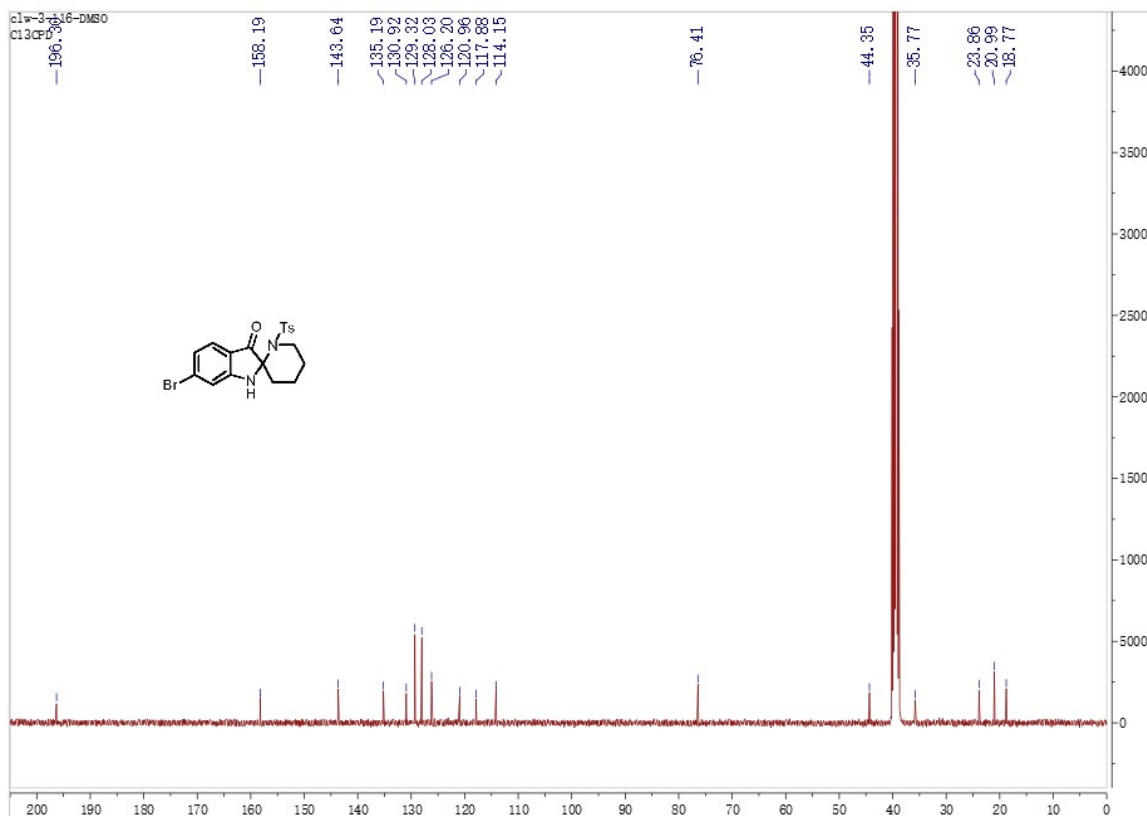

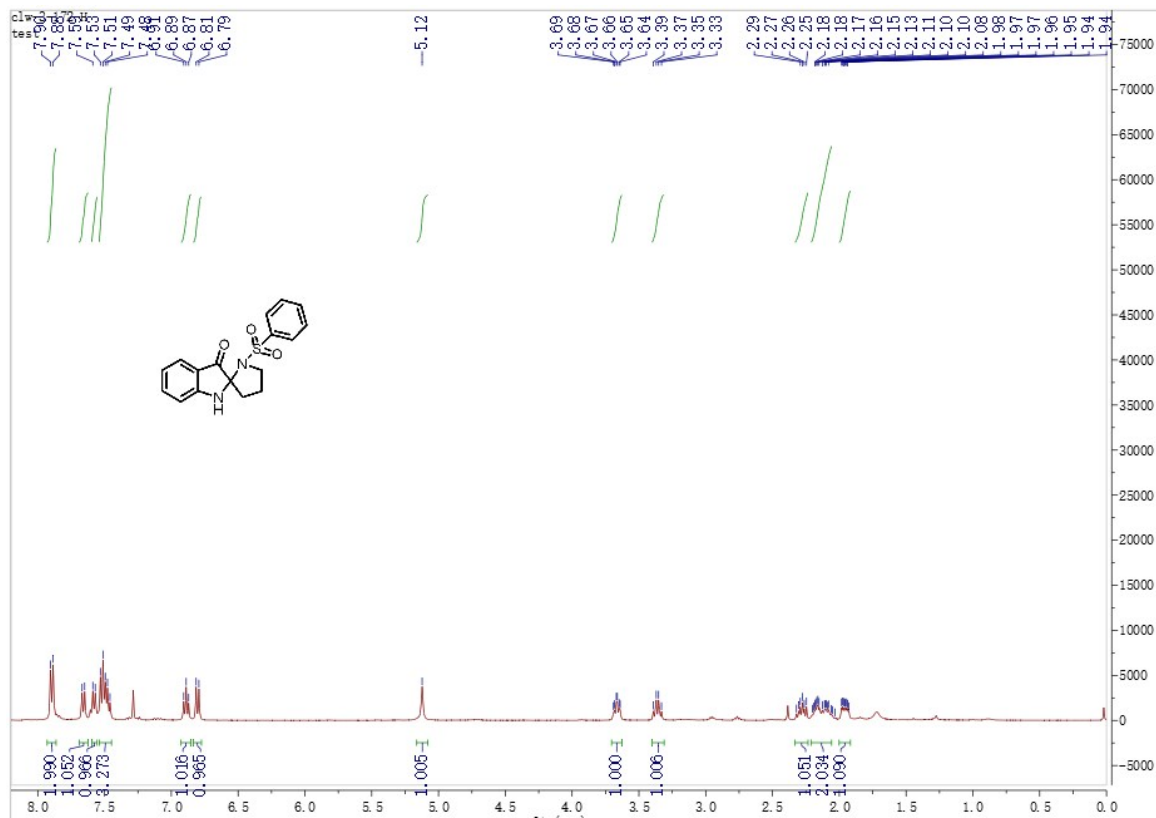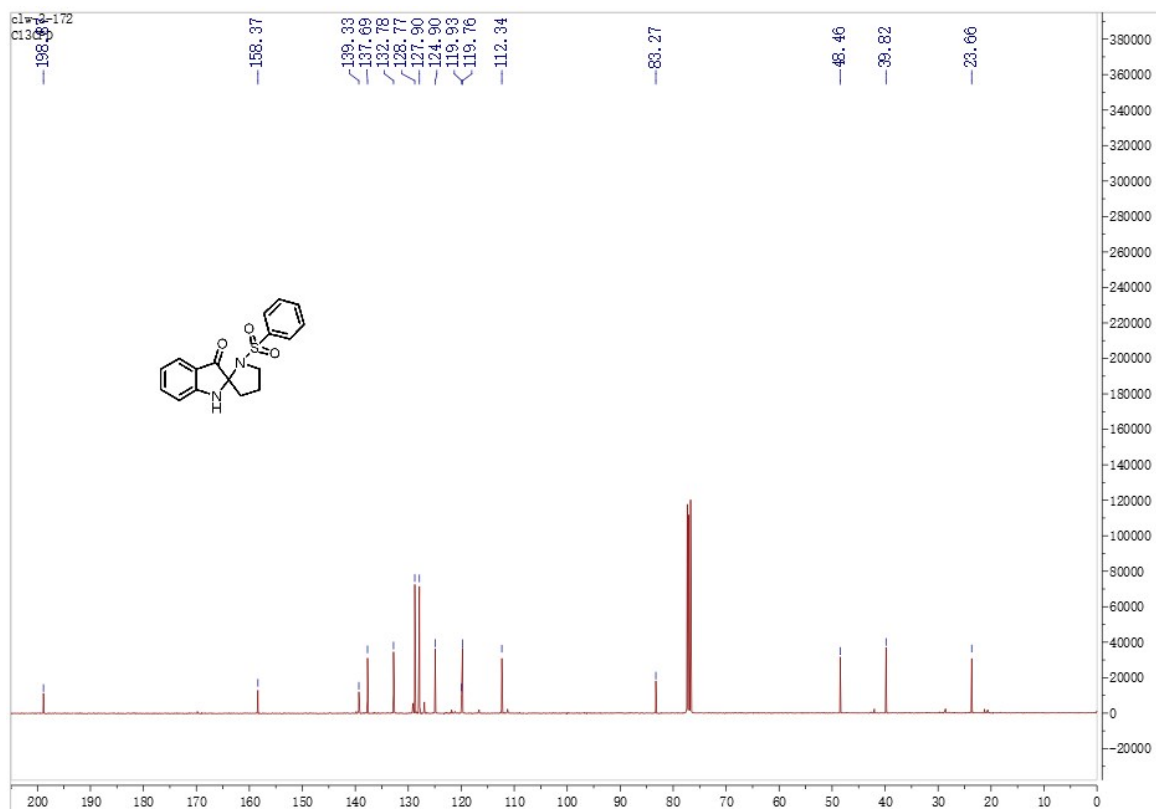

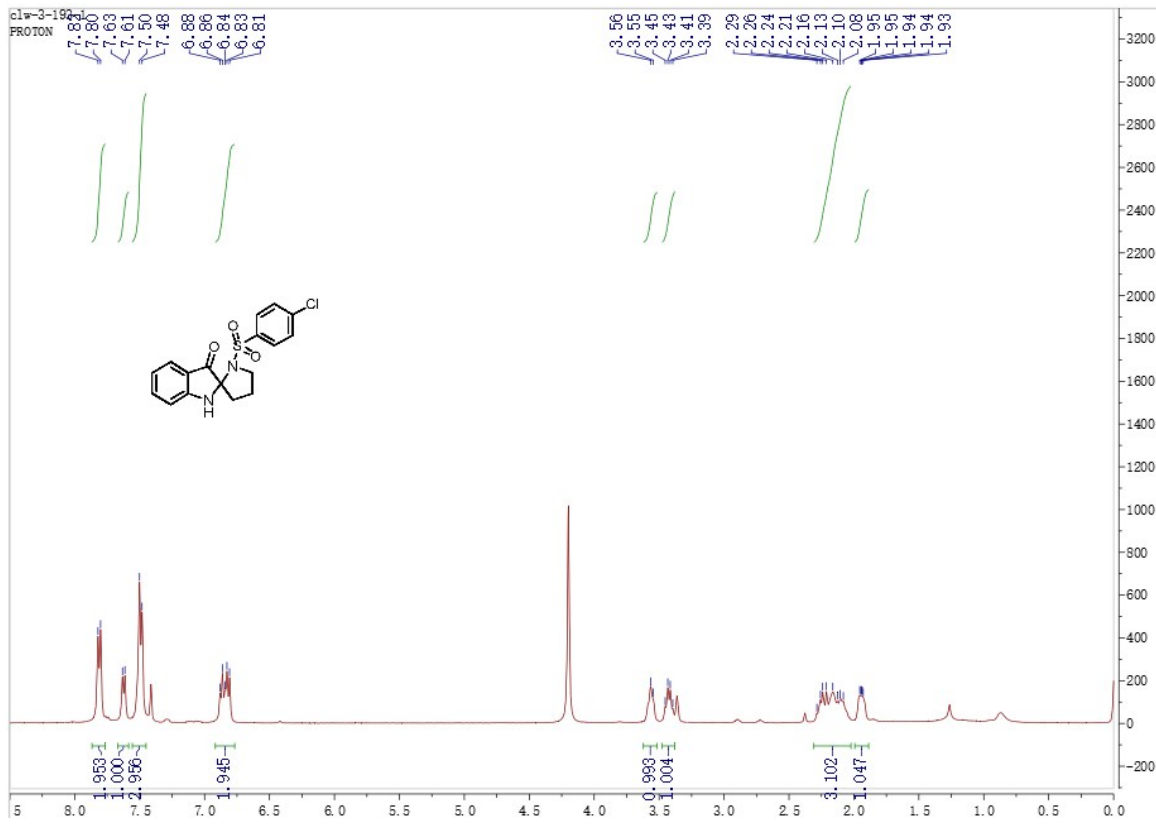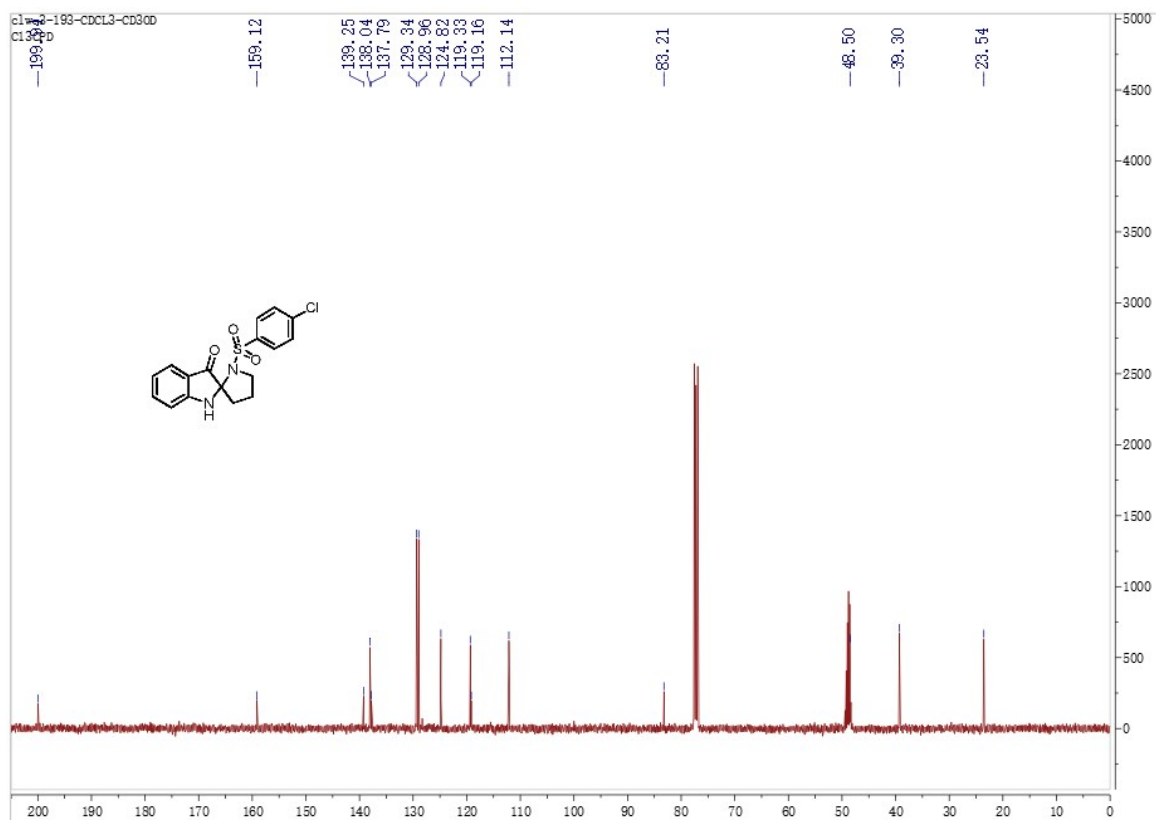

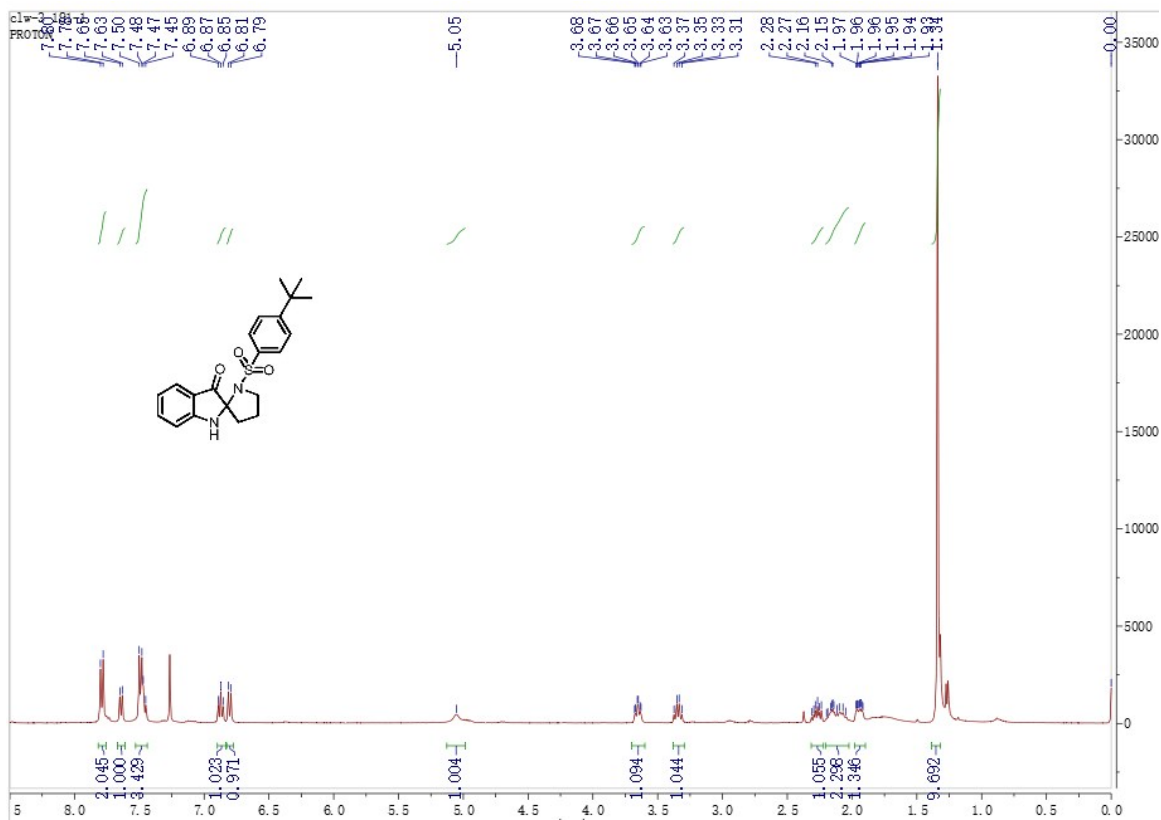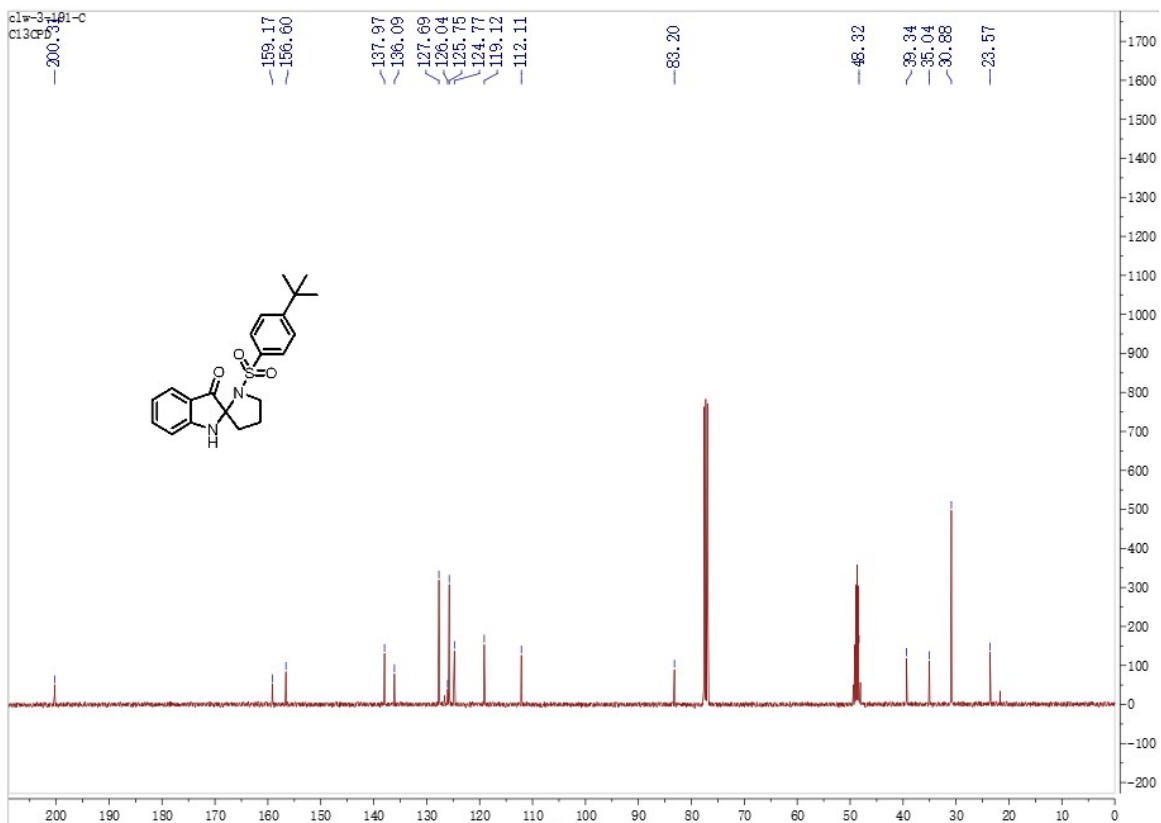

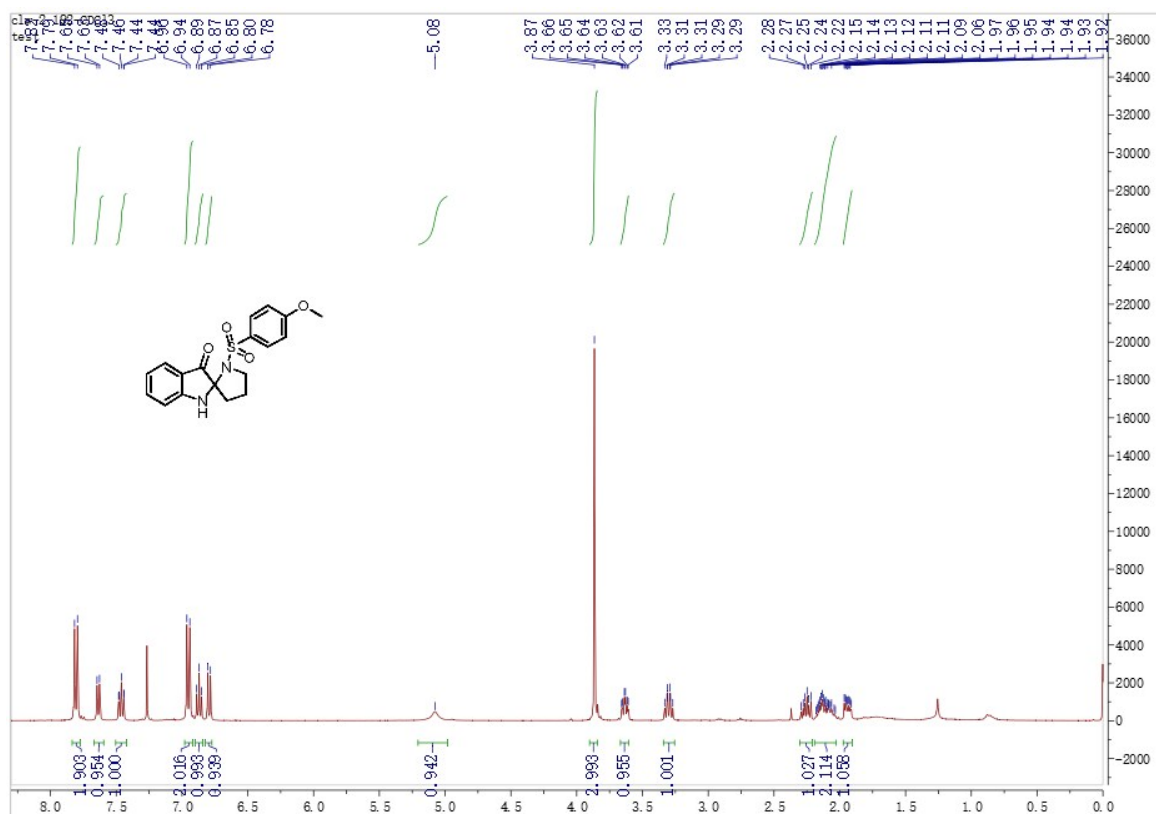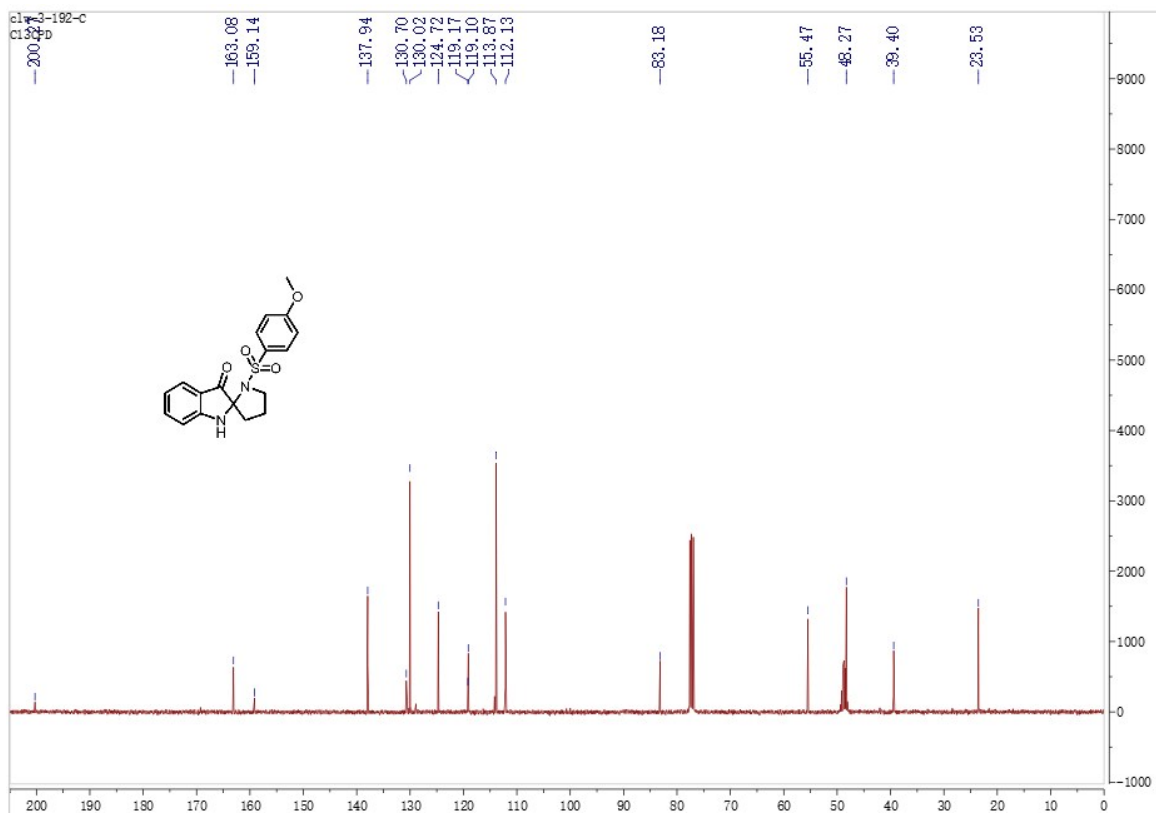



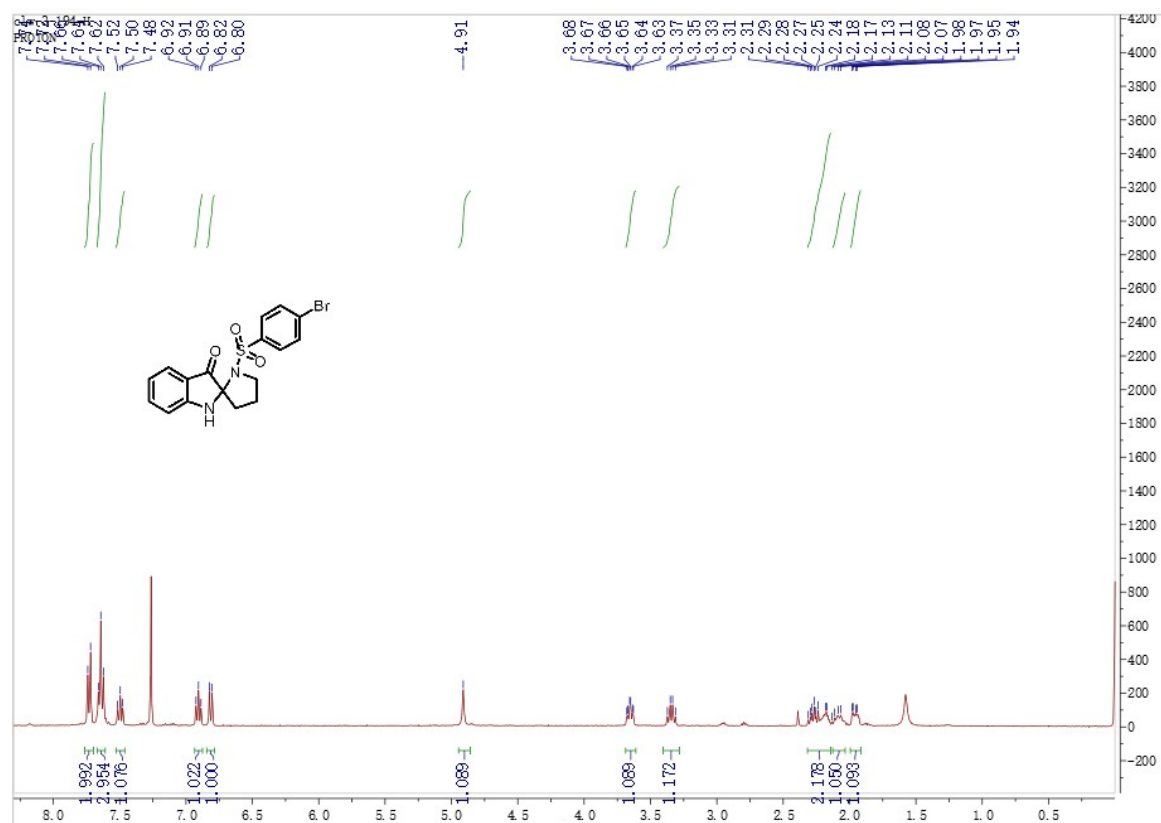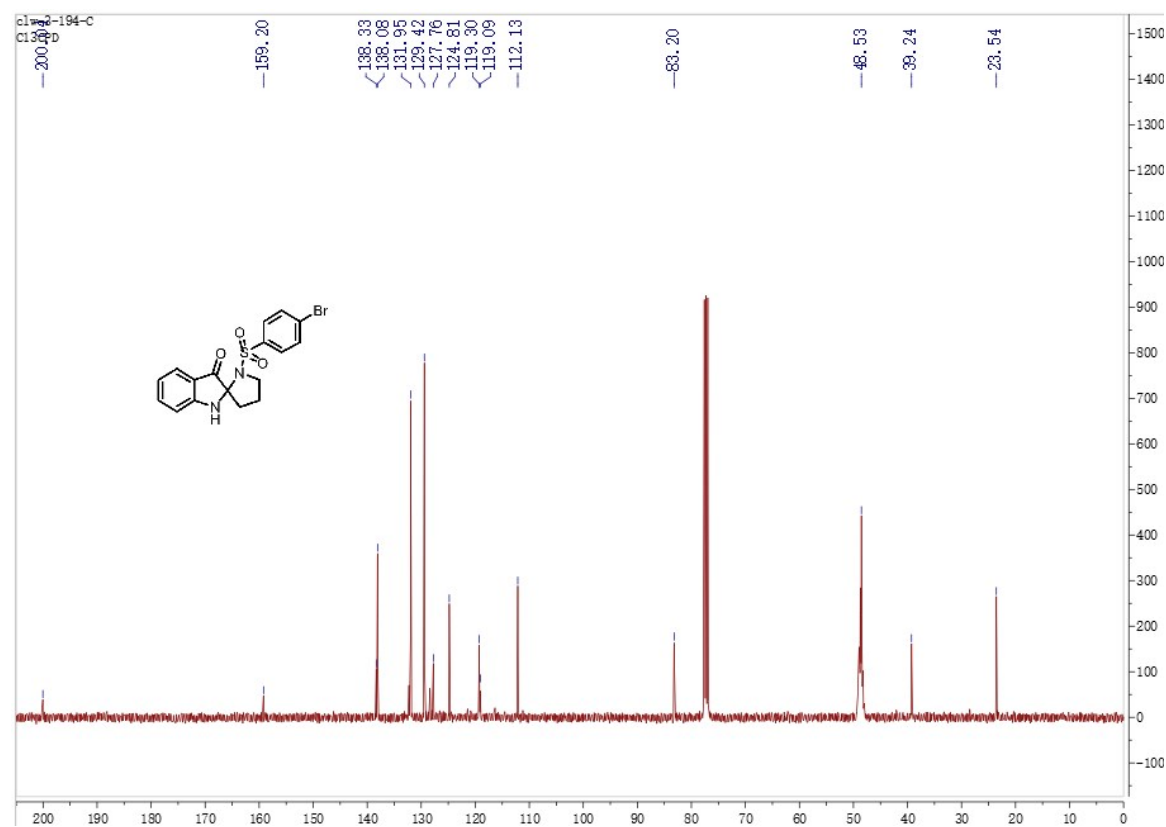

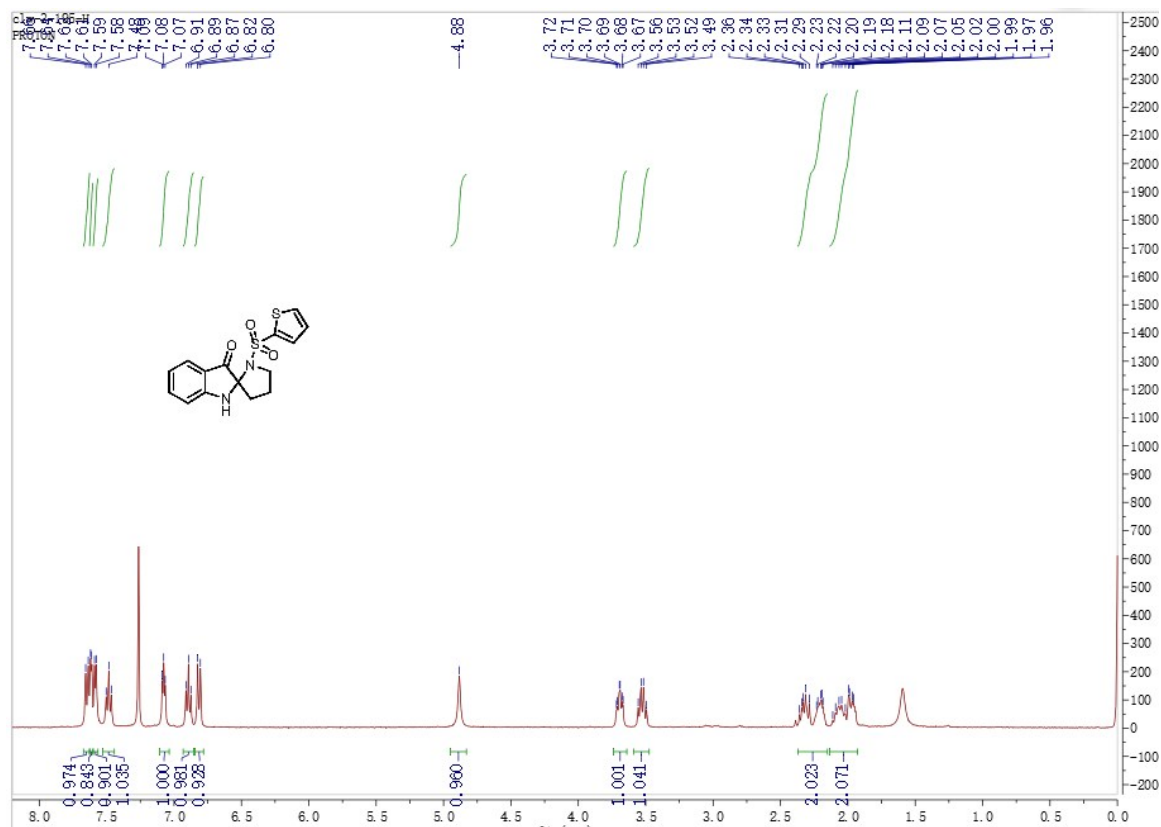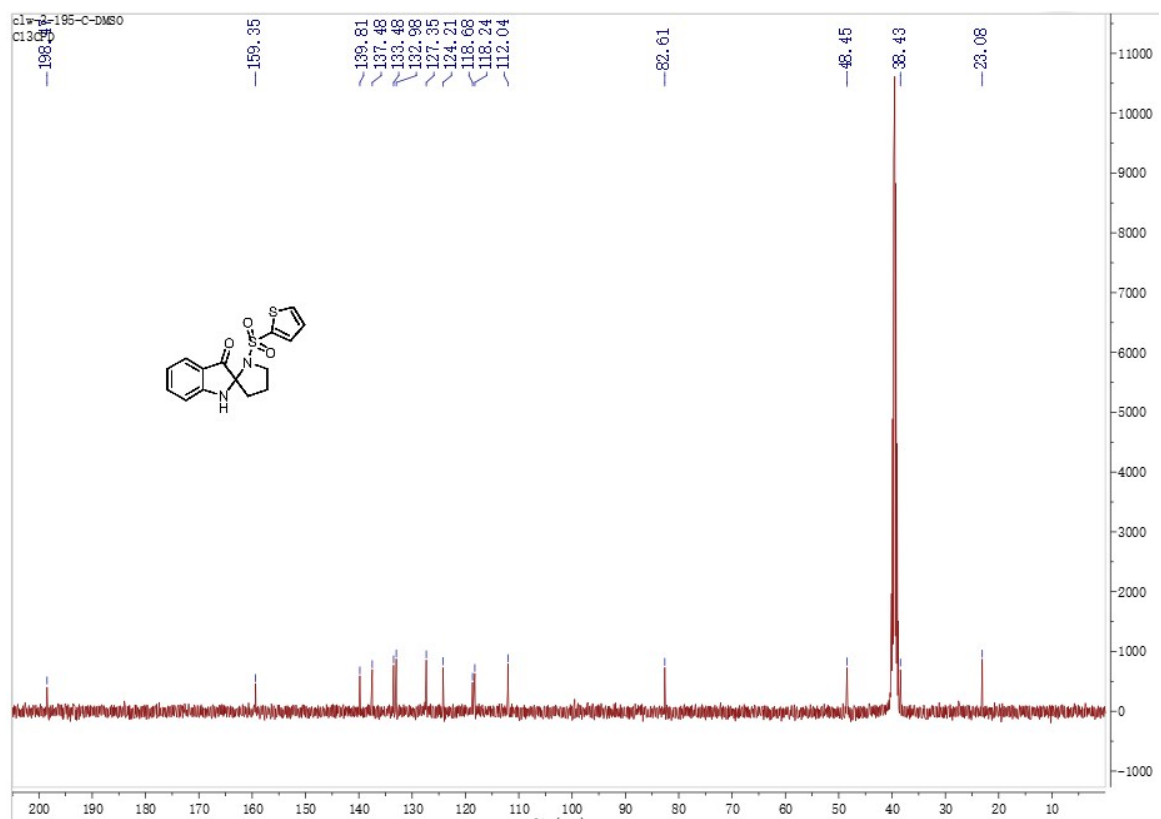

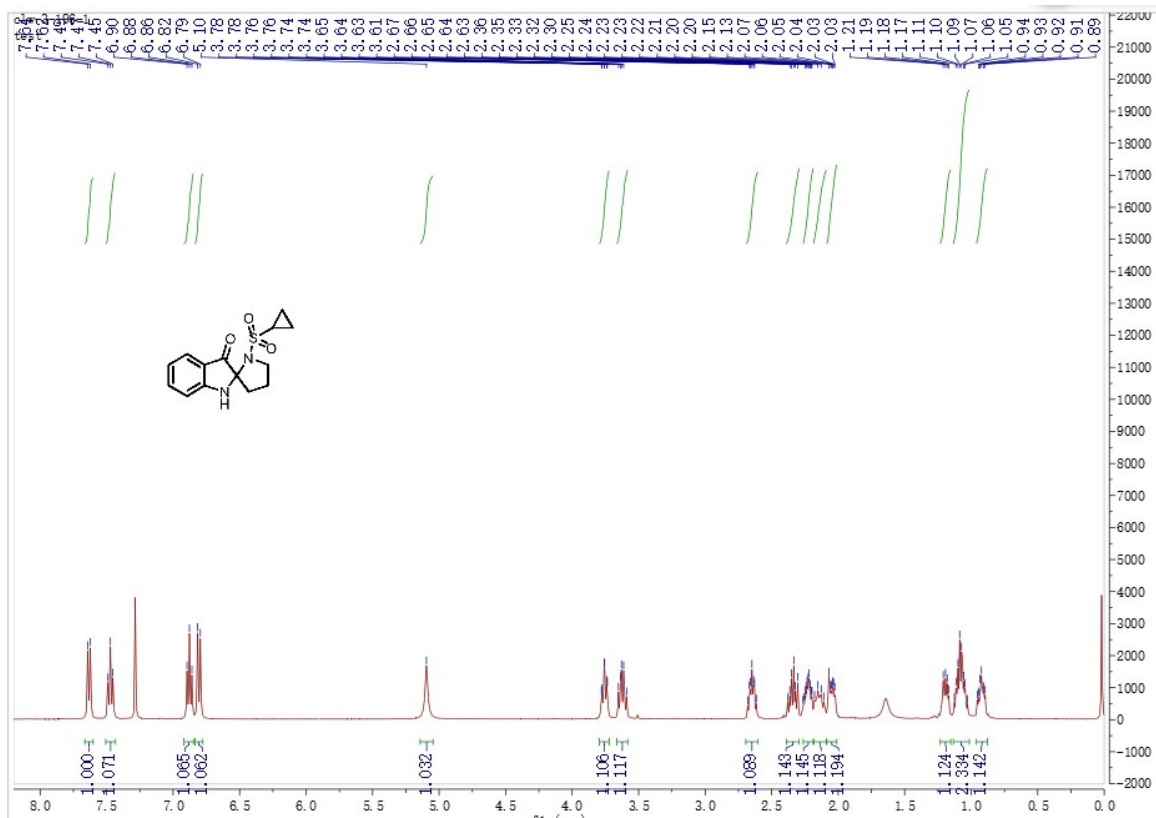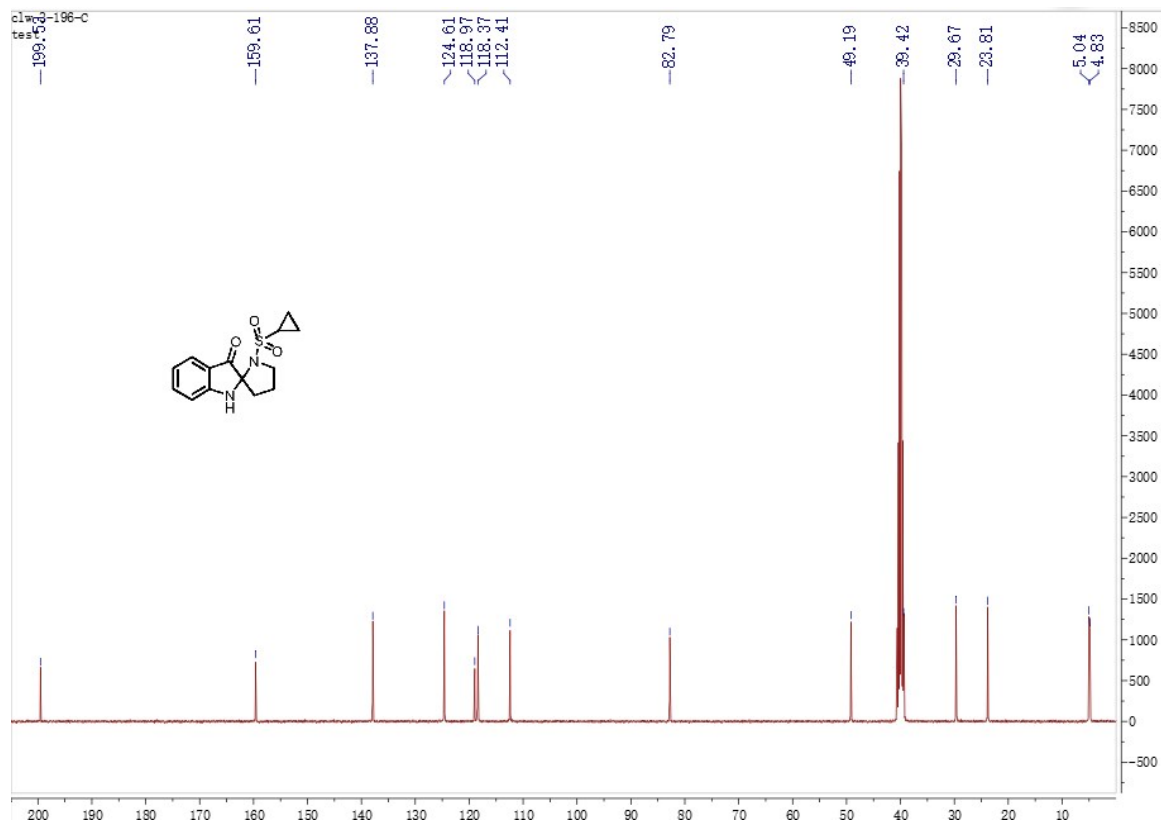

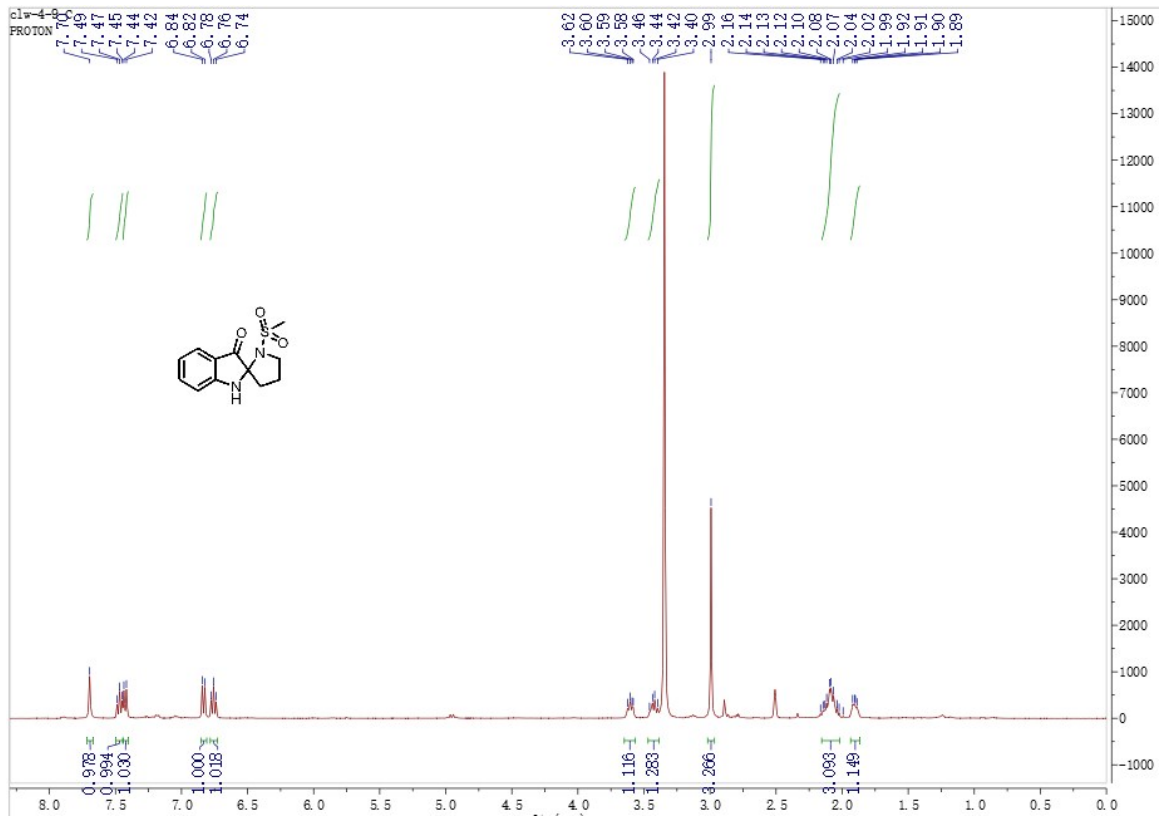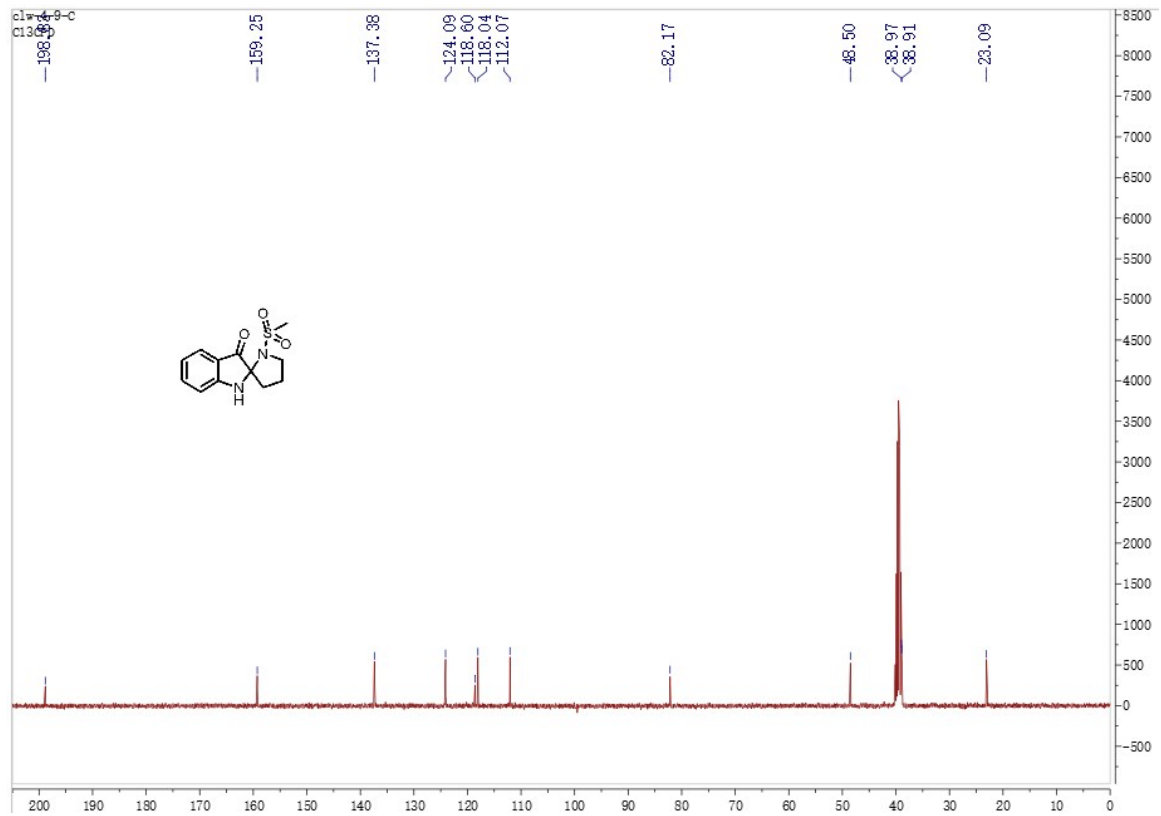

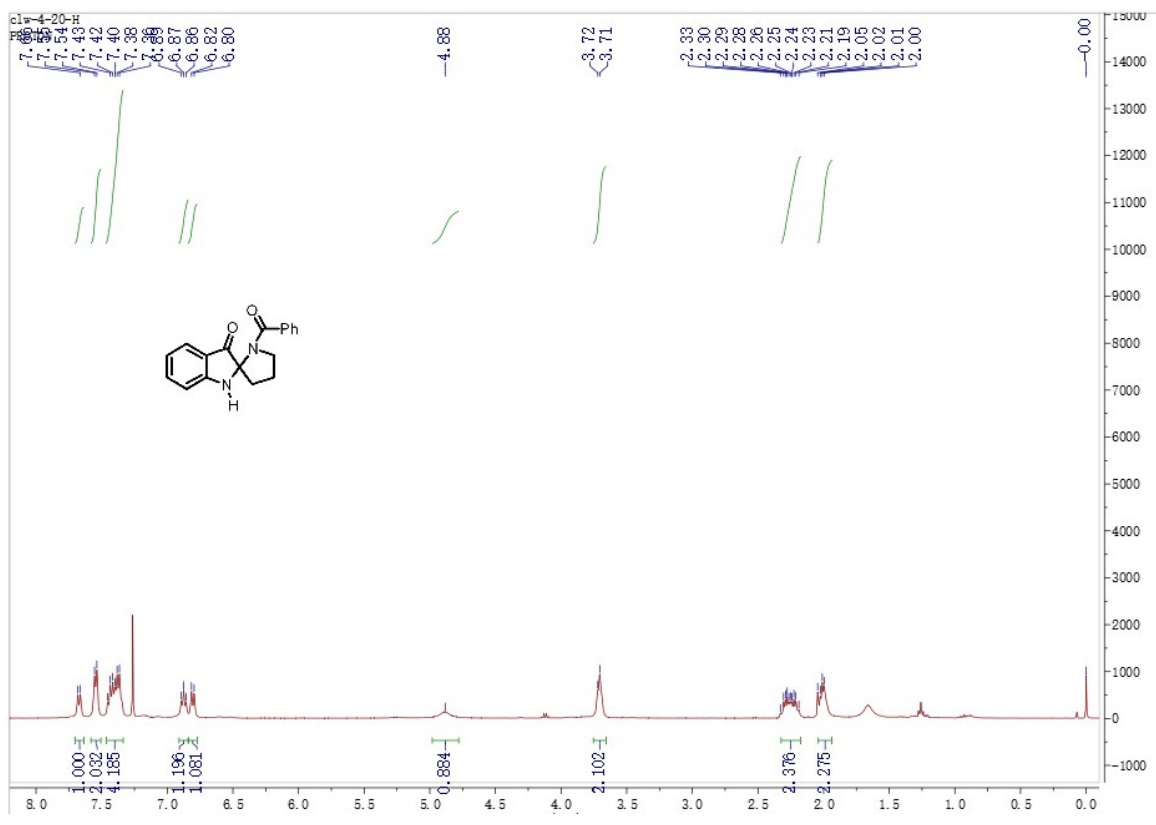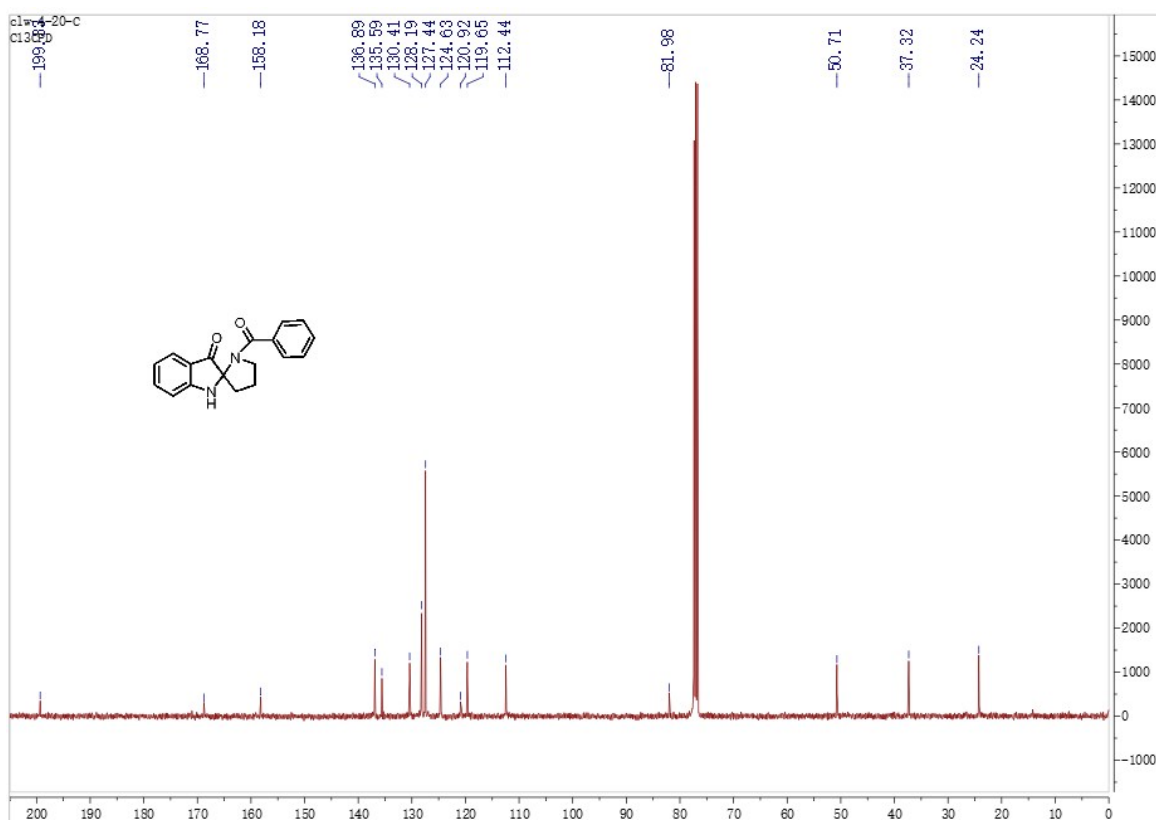

Supplement: c7qo00272f1.pdf [file c7qo00272f1.pdf]
